# Supplementary material for: Comparative micromechanics of bushcricket ears with and without a specialized auditory fovea region in the crista acustica
Source: Proc Biol Sci. 2020 Jun 24;287(1929):20200909. doi: 10.1098/rspb.2020.0909 (PMC7329045; doi:10.1098/rspb.2020.0909)
Supplement: Data for figure 3 [file rspb20200909supp1.xlsx]

## Sheet: Ancylecha fenestrata male
Amplitude Data (m)		Frequency (kHz)
Position on CA (µm)	Index Point	2	2.5	3	3.5	4	4.5	5	5.5	6	6.5	7	7.5	8	8.5	9	9.5	10	10.5	11	11.5	12	12.5	13	13.5	14	14.5	15	15.5	16	16.5	17	17.5	18	18.5	19	19.5	20	30	40	50	60
0	1	8.97671e-10	9.56479e-10	4.85509e-10	1.42712e-09	8.53772e-10	1.62982e-09	9.70799e-10	1.29189e-09	2.16547e-09	3.56366e-09	2.07068e-09	3.72727e-09	7.98562e-09	6.62825e-09	1.01004e-08	9.56264e-09	6.40586e-09	6.78926e-09	4.16912e-09	5.27716e-09	2.17296e-09	5.35554e-09	2.02708e-09	2.48652e-09	2.2135e-09	1.78347e-09	2.73481e-09	8.8792e-10	1.5681e-09	8.25875e-10	5.27131e-10	3.84407e-10	5.39946e-10	6.4335e-10	5.66563e-10	6.67809e-10	4.37263e-10	6.90182e-10	1.41087e-10	6.12212e-11	8.77141e-11
18.486	2	8.5738e-10	9.78059e-10	4.67502e-10	1.34736e-09	8.37805e-10	1.70827e-09	9.63467e-10	1.31139e-09	2.23129e-09	3.62581e-09	2.06088e-09	3.90583e-09	8.09568e-09	6.8575e-09	9.86852e-09	9.56694e-09	6.81127e-09	7.23423e-09	4.26523e-09	5.74172e-09	2.21003e-09	5.76695e-09	1.98991e-09	2.71972e-09	2.23818e-09	1.87948e-09	2.91931e-09	8.65747e-10	1.53373e-09	8.06632e-10	5.68215e-10	3.89973e-10	5.43147e-10	6.52223e-10	5.71859e-10	6.67012e-10	4.36909e-10	7.3276e-10	1.47263e-10	6.34106e-11	8.84559e-11
36.9708	3	8.17535e-10	9.75515e-10	4.74164e-10	1.31086e-09	8.30735e-10	1.71754e-09	9.45922e-10	1.32066e-09	2.2532e-09	3.68522e-09	2.04235e-09	4.02986e-09	8.19709e-09	7.09598e-09	9.95694e-09	9.7087e-09	6.9286e-09	7.53069e-09	4.33684e-09	5.92389e-09	2.30567e-09	6.1398e-09	2.02447e-09	2.79254e-09	2.36629e-09	1.92986e-09	2.95185e-09	8.61689e-10	1.56284e-09	7.79147e-10	5.89736e-10	3.90774e-10	5.54738e-10	6.7657e-10	5.85244e-10	6.61706e-10	4.3494e-10	7.3905e-10	1.54889e-10	6.63953e-11	9.4764e-11
55.4576	4	7.31315e-10	9.68563e-10	4.65388e-10	1.25269e-09	8.10726e-10	1.7114e-09	9.29759e-10	1.31112e-09	2.26653e-09	3.79535e-09	1.99908e-09	4.09669e-09	8.24509e-09	7.26772e-09	9.92006e-09	9.91913e-09	6.98397e-09	7.85518e-09	4.31468e-09	5.88967e-09	2.3741e-09	6.60098e-09	1.97497e-09	2.82286e-09	2.48813e-09	1.99897e-09	2.97461e-09	8.41924e-10	1.58177e-09	7.64339e-10	5.92459e-10	3.85124e-10	5.65337e-10	6.93505e-10	5.95381e-10	6.44829e-10	4.36537e-10	7.33136e-10	1.63227e-10	7.02077e-11	1.07033e-10
73.9436	5	6.85544e-10	9.69782e-10	4.4764e-10	1.21631e-09	7.9395e-10	1.73653e-09	9.14763e-10	1.32848e-09	2.2981e-09	3.84565e-09	2.00075e-09	4.24883e-09	8.40346e-09	7.4238e-09	9.94142e-09	1.0095e-08	7.12986e-09	8.25223e-09	4.28075e-09	5.84362e-09	2.49332e-09	6.96464e-09	1.94419e-09	2.91807e-09	2.67613e-09	2.05383e-09	3.02605e-09	8.61617e-10	1.61166e-09	7.70734e-10	6.0313e-10	3.97038e-10	5.88546e-10	6.99286e-10	6.22131e-10	6.3502e-10	4.52661e-10	7.63424e-10	1.7678e-10	8.14813e-11	1.3215e-10
92.4292	6	6.07542e-10	9.63388e-10	4.19904e-10	1.16088e-09	7.649e-10	1.76542e-09	9.01025e-10	1.34157e-09	2.3562e-09	4.01026e-09	2.03397e-09	4.46624e-09	8.64089e-09	7.71692e-09	1.02406e-08	1.04936e-08	7.504e-09	8.77441e-09	4.29299e-09	5.91353e-09	2.71326e-09	7.67843e-09	1.94759e-09	3.03645e-09	3.00728e-09	2.21017e-09	3.18812e-09	9.06755e-10	1.67439e-09	7.79503e-10	6.40402e-10	4.08236e-10	6.30672e-10	7.25749e-10	6.87751e-10	6.293e-10	4.87258e-10	8.55265e-10	2.16754e-10	1.06871e-10	1.92317e-10
110.914	7	5.43875e-10	9.55279e-10	3.87472e-10	1.14102e-09	7.47545e-10	1.80792e-09	9.02023e-10	1.35217e-09	2.42421e-09	4.17332e-09	2.15332e-09	4.60328e-09	8.73475e-09	7.8408e-09	1.06471e-08	1.09714e-08	7.83377e-09	9.18508e-09	4.37319e-09	5.85175e-09	2.92673e-09	8.26783e-09	1.99673e-09	3.08917e-09	3.42474e-09	2.37466e-09	3.37876e-09	9.88667e-10	1.79521e-09	8.27327e-10	6.86718e-10	4.2958e-10	7.00407e-10	7.59697e-10	7.72047e-10	6.27288e-10	5.59525e-10	1.01951e-09	2.76888e-10	1.45438e-10	3.01179e-10
129.399	8	5.05623e-10	9.60103e-10	3.46367e-10	1.14421e-09	7.44509e-10	1.85808e-09	9.11584e-10	1.37273e-09	2.53082e-09	4.29592e-09	2.3689e-09	4.69109e-09	8.8107e-09	7.98237e-09	1.11561e-08	1.16555e-08	8.30052e-09	9.44025e-09	4.57856e-09	6.00538e-09	3.12128e-09	8.73951e-09	2.13626e-09	3.14974e-09	3.78436e-09	2.59421e-09	3.69688e-09	1.12883e-09	1.99299e-09	9.07046e-10	7.60744e-10	4.56921e-10	7.99152e-10	8.13064e-10	9.02498e-10	6.56525e-10	6.53541e-10	1.27786e-09	3.61782e-10	2.08734e-10	4.40958e-10
147.885	9	5.18183e-10	9.73492e-10	3.17742e-10	1.20128e-09	7.47103e-10	1.91614e-09	9.25072e-10	1.38474e-09	2.67609e-09	4.35261e-09	2.66701e-09	4.79656e-09	8.92286e-09	8.15991e-09	1.17142e-08	1.22227e-08	8.94157e-09	9.64609e-09	4.99243e-09	6.3476e-09	3.34517e-09	9.2238e-09	2.41179e-09	3.17821e-09	4.08361e-09	2.86266e-09	4.11312e-09	1.31193e-09	2.23499e-09	1.01164e-09	8.78494e-10	4.95677e-10	9.20296e-10	8.89345e-10	1.06718e-09	7.29055e-10	7.68704e-10	1.64807e-09	4.71658e-10	2.90669e-10	5.9151e-10
166.372	10	5.27185e-10	9.81535e-10	3.04102e-10	1.26266e-09	7.52503e-10	1.94291e-09	9.28223e-10	1.38515e-09	2.81384e-09	4.39986e-09	2.96866e-09	4.81212e-09	8.87419e-09	8.38927e-09	1.20788e-08	1.29094e-08	9.54797e-09	9.85929e-09	5.53069e-09	6.76166e-09	3.57156e-09	9.67464e-09	2.75378e-09	3.21746e-09	4.33023e-09	3.13734e-09	4.59267e-09	1.48711e-09	2.58577e-09	1.12046e-09	1.01619e-09	5.34215e-10	1.06577e-09	9.97614e-10	1.25221e-09	8.29734e-10	9.07948e-10	2.08594e-09	6.0481e-10	3.78917e-10	7.23285e-10
184.857	11	5.41807e-10	1.00069e-09	2.91328e-10	1.31981e-09	7.48244e-10	1.95526e-09	9.13265e-10	1.40124e-09	2.92564e-09	4.36698e-09	3.21174e-09	4.95093e-09	8.90027e-09	8.80083e-09	1.21859e-08	1.36804e-08	1.02165e-08	1.01777e-08	6.09373e-09	7.29112e-09	3.79439e-09	1.01756e-08	3.09782e-09	3.44106e-09	4.48757e-09	3.42488e-09	5.12092e-09	1.64977e-09	2.96521e-09	1.24506e-09	1.16403e-09	5.87737e-10	1.22701e-09	1.14451e-09	1.46605e-09	1.0014e-09	1.05419e-09	2.62082e-09	7.46138e-10	4.63687e-10	7.88298e-10
203.344	12	5.53037e-10	1.01481e-09	2.89437e-10	1.36865e-09	7.40835e-10	1.91343e-09	9.0155e-10	1.41549e-09	3.00178e-09	4.35782e-09	3.40024e-09	5.13045e-09	9.08869e-09	9.34549e-09	1.25351e-08	1.44023e-08	1.09097e-08	1.09134e-08	6.61996e-09	7.76872e-09	4.12119e-09	1.08721e-08	3.5125e-09	3.90171e-09	4.7234e-09	3.66879e-09	5.74049e-09	1.81567e-09	3.37317e-09	1.36139e-09	1.30167e-09	6.62278e-10	1.39215e-09	1.31774e-09	1.70355e-09	1.22079e-09	1.20754e-09	3.30353e-09	8.86468e-10	5.25712e-10	7.72238e-10
221.83	13	5.55863e-10	1.02284e-09	2.91635e-10	1.39706e-09	7.18295e-10	1.85302e-09	8.79593e-10	1.42757e-09	3.02416e-09	4.45207e-09	3.53051e-09	5.31082e-09	9.299e-09	9.92055e-09	1.28387e-08	1.51246e-08	1.15872e-08	1.17033e-08	7.06031e-09	8.27001e-09	4.43962e-09	1.14785e-08	3.86516e-09	4.54153e-09	5.05287e-09	3.87319e-09	6.36639e-09	1.96806e-09	3.77598e-09	1.50591e-09	1.43284e-09	7.40077e-10	1.60246e-09	1.51261e-09	1.93456e-09	1.51899e-09	1.38704e-09	4.11022e-09	1.01523e-09	5.41524e-10	6.89194e-10
240.314	14	5.47523e-10	1.03808e-09	2.92079e-10	1.41008e-09	6.96053e-10	1.78348e-09	8.52789e-10	1.46688e-09	3.00436e-09	4.5724e-09	3.61421e-09	5.48862e-09	9.45066e-09	1.05215e-08	1.34841e-08	1.60444e-08	1.20944e-08	1.25335e-08	7.50432e-09	8.92153e-09	4.80418e-09	1.2013e-08	4.21031e-09	5.36981e-09	5.50275e-09	4.11631e-09	6.93269e-09	2.17276e-09	4.13795e-09	1.69933e-09	1.57326e-09	8.37323e-10	1.8534e-09	1.72771e-09	2.20485e-09	1.79487e-09	1.59572e-09	5.03628e-09	1.09791e-09	5.13248e-10	5.60265e-10
258.801	15	5.26338e-10	1.05683e-09	2.9384e-10	1.40835e-09	6.68656e-10	1.7024e-09	8.44349e-10	1.47638e-09	2.97854e-09	4.74359e-09	3.67468e-09	5.55129e-09	9.61631e-09	1.11246e-08	1.44255e-08	1.70807e-08	1.24963e-08	1.34526e-08	7.95061e-09	9.71981e-09	5.20344e-09	1.26798e-08	4.54306e-09	6.23703e-09	6.00031e-09	4.43313e-09	7.51792e-09	2.42637e-09	4.42933e-09	1.92225e-09	1.74089e-09	9.36471e-10	2.15703e-09	1.99179e-09	2.50758e-09	2.08478e-09	1.83957e-09	6.09333e-09	1.11822e-09	4.45773e-10	4.16011e-10
277.287	16	4.95866e-10	1.06806e-09	3.01469e-10	1.39487e-09	6.39165e-10	1.63301e-09	8.30049e-10	1.47471e-09	2.94724e-09	4.95146e-09	3.72543e-09	5.54449e-09	9.76773e-09	1.16658e-08	1.51844e-08	1.80621e-08	1.28231e-08	1.44172e-08	8.48457e-09	1.06347e-08	5.58016e-09	1.34961e-08	4.87363e-09	6.9905e-09	6.61436e-09	4.85962e-09	8.16072e-09	2.72057e-09	4.7033e-09	2.21561e-09	1.96996e-09	1.03146e-09	2.50906e-09	2.2403e-09	2.84001e-09	2.37451e-09	2.12193e-09	7.07861e-09	1.06915e-09	3.50511e-10	2.99192e-10
295.773	17	4.68166e-10	1.0708e-09	3.05209e-10	1.35663e-09	6.0586e-10	1.56581e-09	7.93627e-10	1.46458e-09	2.91666e-09	5.09518e-09	3.74247e-09	5.51933e-09	9.74004e-09	1.21406e-08	1.59071e-08	1.90365e-08	1.30111e-08	1.52873e-08	9.09708e-09	1.16213e-08	5.87344e-09	1.43784e-08	5.2056e-09	7.58891e-09	7.2097e-09	5.42477e-09	8.70722e-09	3.06494e-09	5.02786e-09	2.55335e-09	2.28703e-09	1.13709e-09	2.87342e-09	2.52709e-09	3.24676e-09	2.69631e-09	2.47882e-09	7.82273e-09	9.54077e-10	2.55431e-10	2.11496e-10
314.258	18	4.34895e-10	1.06067e-09	2.99928e-10	1.31241e-09	5.78881e-10	1.51562e-09	7.80262e-10	1.43814e-09	2.87382e-09	5.12674e-09	3.72442e-09	5.49335e-09	9.8665e-09	1.24817e-08	1.64877e-08	1.98057e-08	1.32738e-08	1.63944e-08	9.70457e-09	1.23048e-08	6.11238e-09	1.55492e-08	5.50013e-09	8.10226e-09	7.80166e-09	6.12724e-09	9.37364e-09	3.40642e-09	5.30773e-09	2.91082e-09	2.63575e-09	1.2826e-09	3.31037e-09	2.91603e-09	3.71959e-09	3.104e-09	2.89603e-09	8.14212e-09	7.89932e-10	1.75383e-10	1.53282e-10
332.743	19	4.12535e-10	1.0242e-09	2.91819e-10	1.25721e-09	5.58983e-10	1.4608e-09	7.62117e-10	1.4081e-09	2.81929e-09	5.13288e-09	3.72524e-09	5.51791e-09	1.01094e-08	1.26796e-08	1.69431e-08	2.03252e-08	1.36802e-08	1.74768e-08	1.02802e-08	1.28539e-08	6.32543e-09	1.66794e-08	5.81563e-09	8.53436e-09	8.49484e-09	6.95633e-09	1.03081e-08	3.78614e-09	6.05236e-09	3.31962e-09	3.02383e-09	1.45659e-09	3.80561e-09	3.31992e-09	4.34489e-09	3.6971e-09	3.37685e-09	7.94868e-09	6.18476e-10	1.18544e-10	1.22302e-10
351.229	20	3.98716e-10	9.73719e-10	2.78204e-10	1.19677e-09	5.37216e-10	1.41301e-09	7.40169e-10	1.39655e-09	2.74528e-09	5.0895e-09	3.70061e-09	5.61836e-09	1.03748e-08	1.28143e-08	1.75303e-08	2.08987e-08	1.42088e-08	1.81897e-08	1.08845e-08	1.33311e-08	6.58128e-09	1.7589e-08	6.13924e-09	9.06351e-09	9.29168e-09	7.8976e-09	1.14101e-08	4.23578e-09	7.10561e-09	3.87373e-09	3.48714e-09	1.69545e-09	4.32971e-09	3.74303e-09	5.11077e-09	4.36327e-09	3.91902e-09	7.23824e-09	4.63223e-10	8.54672e-11	1.0552e-10
369.716	21	3.86335e-10	9.09076e-10	2.60398e-10	1.13912e-09	5.29915e-10	1.39501e-09	7.46952e-10	1.38778e-09	2.68496e-09	5.05934e-09	3.70678e-09	5.67381e-09	1.06712e-08	1.2989e-08	1.82721e-08	2.15906e-08	1.49001e-08	1.89532e-08	1.14687e-08	1.37761e-08	7.04048e-09	1.83269e-08	6.49602e-09	9.73978e-09	1.02625e-08	9.0188e-09	1.28845e-08	4.783e-09	8.7788e-09	4.49572e-09	4.03456e-09	2.01167e-09	4.92962e-09	4.27625e-09	5.92709e-09	5.02291e-09	4.47629e-09	6.13631e-09	3.38977e-10	6.91474e-11	9.57165e-11
388.201	22	3.76982e-10	8.41022e-10	2.50563e-10	1.09334e-09	5.18846e-10	1.37799e-09	7.47023e-10	1.37469e-09	2.64357e-09	5.0818e-09	3.73773e-09	5.75366e-09	1.10743e-08	1.33212e-08	1.89883e-08	2.24369e-08	1.56791e-08	1.95286e-08	1.20669e-08	1.4416e-08	7.69597e-09	1.89525e-08	6.97544e-09	1.05227e-08	1.14638e-08	1.04688e-08	1.48827e-08	5.37291e-09	1.07238e-08	5.26816e-09	4.73116e-09	2.38241e-09	5.60351e-09	4.82226e-09	6.82969e-09	5.64627e-09	4.9807e-09	4.90635e-09	2.53413e-10	6.09848e-11	8.83645e-11
406.687	23	3.71848e-10	7.82016e-10	2.45392e-10	1.04903e-09	5.05662e-10	1.35288e-09	7.36002e-10	1.36394e-09	2.62818e-09	5.16522e-09	3.77926e-09	5.81531e-09	1.13707e-08	1.37498e-08	1.98236e-08	2.33618e-08	1.64391e-08	2.00756e-08	1.27149e-08	1.54029e-08	8.41611e-09	1.96861e-08	7.79031e-09	1.14216e-08	1.28731e-08	1.21693e-08	1.67424e-08	6.14506e-09	1.26994e-08	6.15153e-09	5.51186e-09	2.7008e-09	6.18396e-09	5.22583e-09	7.64293e-09	6.0435e-09	5.36562e-09	3.72764e-09	1.96729e-10	5.66258e-11	8.11088e-11
425.173	24	3.70347e-10	7.34315e-10	2.44067e-10	1.00989e-09	5.01255e-10	1.34307e-09	7.2965e-10	1.34074e-09	2.6257e-09	5.29239e-09	3.85224e-09	5.82395e-09	1.15355e-08	1.4233e-08	2.03556e-08	2.4306e-08	1.72209e-08	2.08639e-08	1.33335e-08	1.64488e-08	9.28205e-09	2.07234e-08	8.80281e-09	1.27978e-08	1.46373e-08	1.41427e-08	1.86161e-08	7.03222e-09	1.42954e-08	6.92168e-09	6.2944e-09	2.98889e-09	6.69253e-09	5.67967e-09	8.24269e-09	6.20771e-09	5.57252e-09	2.73612e-09	1.62028e-10	5.18614e-11	7.34392e-11
443.659	25	3.65435e-10	7.04359e-10	2.5034e-10	9.94475e-10	5.08334e-10	1.3218e-09	7.17753e-10	1.31459e-09	2.6132e-09	5.38057e-09	3.94039e-09	5.89651e-09	1.17808e-08	1.47119e-08	2.06323e-08	2.52786e-08	1.79962e-08	2.17979e-08	1.3889e-08	1.76632e-08	1.01397e-08	2.2435e-08	1.00964e-08	1.46043e-08	1.69349e-08	1.63078e-08	2.04411e-08	7.85363e-09	1.56638e-08	7.55127e-09	6.91277e-09	3.182e-09	7.09255e-09	5.98748e-09	8.63522e-09	6.15571e-09	5.51726e-09	2.01854e-09	1.4044e-10	4.69844e-11	6.65669e-11
462.145	26	3.59387e-10	6.94132e-10	2.59766e-10	9.80012e-10	5.17213e-10	1.27339e-09	6.93236e-10	1.27904e-09	2.57583e-09	5.41164e-09	4.02343e-09	5.99393e-09	1.19438e-08	1.48982e-08	2.08853e-08	2.61999e-08	1.85472e-08	2.29585e-08	1.43274e-08	1.87203e-08	1.09356e-08	2.48379e-08	1.15621e-08	1.68172e-08	1.96526e-08	1.84791e-08	2.16232e-08	8.59747e-09	1.66305e-08	7.98603e-09	7.26663e-09	3.25518e-09	7.26211e-09	6.02434e-09	8.73657e-09	5.91972e-09	5.22649e-09	1.58796e-09	1.25096e-10	4.41746e-11	5.99634e-11
480.631	27	3.52311e-10	6.93291e-10	2.71699e-10	9.84219e-10	5.3408e-10	1.24686e-09	6.74523e-10	1.25083e-09	2.50388e-09	5.33835e-09	4.10904e-09	6.04136e-09	1.21661e-08	1.49877e-08	2.09303e-08	2.70703e-08	1.90066e-08	2.40377e-08	1.46661e-08	1.97096e-08	1.1967e-08	2.77212e-08	1.30596e-08	1.95153e-08	2.26419e-08	2.05845e-08	2.26378e-08	9.19684e-09	1.72163e-08	8.15593e-09	7.31364e-09	3.25635e-09	7.23568e-09	5.89442e-09	8.49237e-09	5.4587e-09	4.70972e-09	1.28331e-09	1.15717e-10	4.10859e-11	5.44768e-11
499.117	28	3.42145e-10	6.94447e-10	2.88431e-10	9.99681e-10	5.53274e-10	1.22096e-09	6.54208e-10	1.21933e-09	2.40545e-09	5.20048e-09	4.14521e-09	6.12032e-09	1.23345e-08	1.49459e-08	2.10649e-08	2.78964e-08	1.94622e-08	2.51153e-08	1.50188e-08	2.08651e-08	1.32924e-08	3.15393e-08	1.45459e-08	2.25298e-08	2.57129e-08	2.2508e-08	2.31643e-08	9.42941e-09	1.74779e-08	8.08157e-09	7.07059e-09	3.19307e-09	7.06904e-09	5.56212e-09	7.9946e-09	4.89011e-09	4.05885e-09	1.136e-09	1.09186e-10	3.97866e-11	5.17301e-11
517.602	29	3.29127e-10	6.98535e-10	3.06091e-10	1.01023e-09	5.69966e-10	1.1887e-09	6.35928e-10	1.19732e-09	2.28852e-09	5.01869e-09	4.12317e-09	6.15006e-09	1.25801e-08	1.50406e-08	2.15182e-08	2.87254e-08	1.97632e-08	2.62004e-08	1.5405e-08	2.23879e-08	1.49037e-08	3.57957e-08	1.60827e-08	2.56678e-08	2.84086e-08	2.43296e-08	2.34808e-08	9.35293e-09	1.70252e-08	7.85376e-09	6.60455e-09	3.02199e-09	6.77304e-09	4.96448e-09	7.27315e-09	4.22989e-09	3.3754e-09	1.0743e-09	1.04079e-10	3.96734e-11	4.97865e-11
536.088	30	3.19753e-10	6.98854e-10	3.22595e-10	1.01278e-09	5.92729e-10	1.17166e-09	6.23381e-10	1.18343e-09	2.19618e-09	4.89224e-09	4.13753e-09	6.12402e-09	1.28367e-08	1.52392e-08	2.20386e-08	2.93002e-08	2.00839e-08	2.73713e-08	1.59441e-08	2.45629e-08	1.69627e-08	4.00673e-08	1.76078e-08	2.84914e-08	3.01176e-08	2.58733e-08	2.37406e-08	9.10268e-09	1.60295e-08	7.37765e-09	5.98029e-09	2.73262e-09	6.28582e-09	4.27266e-09	6.36202e-09	3.54311e-09	2.72758e-09	1.00881e-09	9.89667e-11	3.9407e-11	4.85178e-11
554.573	31	3.11379e-10	6.95919e-10	3.35795e-10	1.01329e-09	6.21861e-10	1.14348e-09	6.1423e-10	1.18307e-09	2.11807e-09	4.80781e-09	4.11125e-09	6.10749e-09	1.30461e-08	1.561e-08	2.27679e-08	3.00455e-08	2.05045e-08	2.83623e-08	1.66528e-08	2.76069e-08	1.93468e-08	4.43627e-08	1.90992e-08	3.1028e-08	3.08221e-08	2.68107e-08	2.41894e-08	8.60721e-09	1.43106e-08	6.70758e-09	5.28549e-09	2.4057e-09	5.73598e-09	3.62067e-09	5.42305e-09	2.90737e-09	2.17725e-09	9.58764e-10	9.40516e-11	3.95873e-11	4.73961e-11
573.059	32	3.03027e-10	7.02235e-10	3.43404e-10	1.0008e-09	6.55269e-10	1.09469e-09	6.18914e-10	1.19327e-09	2.02999e-09	4.76423e-09	4.11798e-09	6.11508e-09	1.32319e-08	1.61109e-08	2.36076e-08	3.12018e-08	2.08398e-08	2.97195e-08	1.74744e-08	3.14907e-08	2.16999e-08	4.84656e-08	2.04974e-08	3.28252e-08	3.06466e-08	2.68716e-08	2.45488e-08	8.02909e-09	1.23457e-08	5.90108e-09	4.53559e-09	1.98592e-09	5.14269e-09	2.95503e-09	4.52409e-09	2.40299e-09	1.74052e-09	9.11418e-10	8.7688e-11	3.99653e-11	4.47071e-11
591.544	33	2.97951e-10	7.15098e-10	3.50342e-10	9.83061e-10	6.88077e-10	1.0682e-09	6.29194e-10	1.20313e-09	1.97581e-09	4.76852e-09	4.16754e-09	6.061e-09	1.33013e-08	1.65515e-08	2.42619e-08	3.2545e-08	2.11294e-08	3.10285e-08	1.85356e-08	3.54581e-08	2.40837e-08	5.18614e-08	2.14642e-08	3.37442e-08	2.96912e-08	2.62839e-08	2.47417e-08	7.44668e-09	1.03245e-08	4.99863e-09	3.82476e-09	1.58735e-09	4.47155e-09	2.40625e-09	3.73903e-09	2.02133e-09	1.3995e-09	8.58275e-10	8.01651e-11	3.91628e-11	4.14222e-11
610.031	34	2.90862e-10	7.24392e-10	3.5533e-10	9.6705e-10	7.19555e-10	1.05094e-09	6.48512e-10	1.21573e-09	1.94583e-09	4.79459e-09	4.1939e-09	6.05607e-09	1.33377e-08	1.70435e-08	2.49277e-08	3.39398e-08	2.14785e-08	3.21335e-08	1.99435e-08	3.93813e-08	2.61644e-08	5.55142e-08	2.21698e-08	3.37725e-08	2.81624e-08	2.47797e-08	2.41157e-08	6.85075e-09	8.64444e-09	4.14032e-09	3.18483e-09	1.26022e-09	3.813e-09	1.99846e-09	3.06557e-09	1.73174e-09	1.13047e-09	8.18803e-10	7.27065e-11	3.78353e-11	3.80845e-11
628.517	35	2.85438e-10	7.31168e-10	3.62737e-10	9.5996e-10	7.47922e-10	1.04796e-09	6.80742e-10	1.21983e-09	1.92655e-09	4.83843e-09	4.22412e-09	6.07363e-09	1.33661e-08	1.73992e-08	2.54977e-08	3.51062e-08	2.1914e-08	3.36849e-08	2.1623e-08	4.33383e-08	2.76735e-08	5.84366e-08	2.25374e-08	3.30673e-08	2.62515e-08	2.27186e-08	2.24469e-08	6.29996e-09	7.17558e-09	3.38622e-09	2.68189e-09	1.02452e-09	3.25986e-09	1.69445e-09	2.5218e-09	1.53968e-09	9.46292e-10	7.86226e-10	6.60592e-11	3.71492e-11	3.50478e-11
647.002	36	2.78826e-10	7.38041e-10	3.74357e-10	9.59014e-10	7.66213e-10	1.07722e-09	7.07113e-10	1.22054e-09	1.97155e-09	4.87485e-09	4.2822e-09	6.13967e-09	1.363e-08	1.7699e-08	2.6094e-08	3.5474e-08	2.2655e-08	3.52943e-08	2.37319e-08	4.66697e-08	2.87401e-08	6.13381e-08	2.24899e-08	3.17166e-08	2.39016e-08	2.05062e-08	2.00247e-08	5.81148e-09	6.08084e-09	2.78928e-09	2.29246e-09	8.44994e-10	2.75063e-09	1.46743e-09	2.09725e-09	1.38006e-09	8.10026e-10	7.57634e-10	6.06053e-11	3.67027e-11	3.24075e-11
665.489	37	2.73533e-10	7.27015e-10	3.87229e-10	9.73783e-10	7.83709e-10	1.12594e-09	7.22808e-10	1.22227e-09	2.05345e-09	4.92323e-09	4.32347e-09	6.22211e-09	1.38495e-08	1.77546e-08	2.66523e-08	3.4848e-08	2.34701e-08	3.71901e-08	2.61338e-08	4.97821e-08	2.90509e-08	6.42058e-08	2.21586e-08	2.98323e-08	2.13228e-08	1.8038e-08	1.6876e-08	5.39716e-09	5.10419e-09	2.34737e-09	1.95874e-09	7.26405e-10	2.28044e-09	1.31679e-09	1.75496e-09	1.23244e-09	7.20267e-10	7.19286e-10	5.58433e-11	3.67012e-11	3.03592e-11
683.975	38	2.71906e-10	7.09513e-10	3.99628e-10	9.94094e-10	8.06808e-10	1.17214e-09	7.27704e-10	1.23537e-09	2.13411e-09	4.95575e-09	4.38497e-09	6.35794e-09	1.4159e-08	1.77792e-08	2.69494e-08	3.4002e-08	2.44548e-08	3.95061e-08	2.84962e-08	5.31685e-08	2.91049e-08	6.55595e-08	2.14258e-08	2.78014e-08	1.87456e-08	1.53662e-08	1.40088e-08	5.06581e-09	4.3227e-09	2.01759e-09	1.69848e-09	6.44382e-10	1.91002e-09	1.20243e-09	1.51974e-09	1.0918e-09	6.66821e-10	6.88386e-10	5.28889e-11	3.7706e-11	2.83754e-11
702.46	39	2.71374e-10	6.98845e-10	4.10047e-10	1.01064e-09	8.37826e-10	1.2119e-09	7.17908e-10	1.25076e-09	2.21552e-09	4.96101e-09	4.52904e-09	6.44568e-09	1.43421e-08	1.7518e-08	2.70275e-08	3.31279e-08	2.54944e-08	4.21107e-08	3.07557e-08	5.58648e-08	2.876e-08	6.6218e-08	2.01428e-08	2.52864e-08	1.63261e-08	1.27792e-08	1.15706e-08	4.66723e-09	3.77043e-09	1.75885e-09	1.46936e-09	5.65895e-10	1.56761e-09	1.08582e-09	1.34994e-09	9.65878e-10	6.21288e-10	6.55626e-10	5.1148e-11	3.83163e-11	2.63804e-11
720.945	40	2.72617e-10	6.8413e-10	4.1702e-10	1.02043e-09	8.74544e-10	1.26191e-09	6.9751e-10	1.26232e-09	2.27001e-09	4.94779e-09	4.66285e-09	6.45204e-09	1.43845e-08	1.72671e-08	2.69954e-08	3.25089e-08	2.61229e-08	4.54334e-08	3.27584e-08	5.79871e-08	2.81969e-08	6.59697e-08	1.84201e-08	2.2452e-08	1.42591e-08	1.04156e-08	9.77876e-09	4.21141e-09	3.29963e-09	1.56537e-09	1.25886e-09	5.21175e-10	1.27907e-09	9.95683e-10	1.20506e-09	8.50507e-10	5.77712e-10	6.18638e-10	4.95457e-11	3.82411e-11	2.4794e-11
739.431	41	2.74751e-10	6.74221e-10	4.22603e-10	1.02406e-09	9.21707e-10	1.29715e-09	6.84275e-10	1.27988e-09	2.26115e-09	4.92841e-09	4.79478e-09	6.47142e-09	1.41069e-08	1.71322e-08	2.66621e-08	3.27776e-08	2.67232e-08	4.91679e-08	3.42736e-08	5.96404e-08	2.73635e-08	6.43091e-08	1.66207e-08	1.94568e-08	1.22967e-08	8.26714e-09	8.41171e-09	3.71052e-09	2.86127e-09	1.39954e-09	1.10806e-09	4.82143e-10	1.06866e-09	9.10846e-10	1.11149e-09	7.50924e-10	5.39785e-10	5.89979e-10	4.87007e-11	3.78128e-11	2.30154e-11
757.916	42	2.73444e-10	6.78299e-10	4.28896e-10	1.04476e-09	9.72422e-10	1.32081e-09	6.80099e-10	1.29848e-09	2.26328e-09	4.92443e-09	4.90665e-09	6.45583e-09	1.3797e-08	1.71202e-08	2.65565e-08	3.33879e-08	2.75753e-08	5.28268e-08	3.51821e-08	6.02667e-08	2.61343e-08	6.22163e-08	1.47095e-08	1.66138e-08	1.0439e-08	6.74053e-09	7.31459e-09	3.11845e-09	2.45789e-09	1.24294e-09	9.94488e-10	4.46468e-10	9.22595e-10	8.26111e-10	1.01669e-09	6.79995e-10	5.06976e-10	5.48443e-10	4.91755e-11	3.76173e-11	2.13613e-11
776.403	43	2.66514e-10	6.95188e-10	4.30619e-10	1.05354e-09	1.01099e-09	1.36756e-09	6.83778e-10	1.33456e-09	2.25179e-09	4.91013e-09	4.91873e-09	6.40561e-09	1.36748e-08	1.72598e-08	2.64953e-08	3.42083e-08	2.87557e-08	5.64709e-08	3.60968e-08	5.99923e-08	2.42708e-08	5.9676e-08	1.29677e-08	1.39957e-08	8.74805e-09	5.73544e-09	6.42178e-09	2.52262e-09	2.13763e-09	1.12417e-09	8.85746e-10	4.20079e-10	8.05221e-10	7.69406e-10	9.17047e-10	6.18292e-10	4.92636e-10	4.96283e-10	4.93712e-11	3.79534e-11	2.0384e-11
794.888	44	2.6112e-10	7.14995e-10	4.30941e-10	1.08376e-09	1.05141e-09	1.42199e-09	7.05676e-10	1.39583e-09	2.22129e-09	4.91867e-09	4.83723e-09	6.33112e-09	1.36145e-08	1.72766e-08	2.64055e-08	3.54314e-08	3.05979e-08	6.02006e-08	3.67993e-08	5.95459e-08	2.19303e-08	5.5646e-08	1.1484e-08	1.17712e-08	7.0784e-09	5.0829e-09	5.67156e-09	2.01302e-09	1.91149e-09	1.01279e-09	8.14877e-10	3.96652e-10	7.01399e-10	7.24271e-10	8.40336e-10	5.76178e-10	4.81227e-10	4.44539e-10	4.98352e-11	3.84e-11	1.89997e-11
813.375	45	2.54007e-10	7.47342e-10	4.29593e-10	1.12398e-09	1.08944e-09	1.46203e-09	7.28668e-10	1.46556e-09	2.18607e-09	4.94216e-09	4.6989e-09	6.24599e-09	1.37005e-08	1.73472e-08	2.64392e-08	3.69103e-08	3.33475e-08	6.22781e-08	3.75189e-08	5.88274e-08	1.93195e-08	5.10175e-08	1.01036e-08	1.00584e-08	5.63936e-09	4.54826e-09	5.0946e-09	1.58218e-09	1.79438e-09	9.15561e-10	7.67785e-10	3.76985e-10	6.08575e-10	6.8696e-10	7.69776e-10	5.44575e-10	4.60369e-10	4.02665e-10	5.01626e-11	3.93844e-11	1.7764e-11
831.861	46	2.49941e-10	7.88512e-10	4.31021e-10	1.15887e-09	1.13774e-09	1.52492e-09	7.48916e-10	1.53838e-09	2.11633e-09	4.89054e-09	4.52823e-09	6.01147e-09	1.38575e-08	1.73456e-08	2.64546e-08	3.88983e-08	3.56248e-08	6.49745e-08	3.83318e-08	5.7266e-08	1.64908e-08	4.55928e-08	8.71563e-09	8.58798e-09	4.75767e-09	4.10832e-09	4.65012e-09	1.28034e-09	1.71503e-09	8.4565e-10	7.00338e-10	3.62317e-10	5.21776e-10	6.57092e-10	6.93414e-10	5.18422e-10	4.35929e-10	3.59778e-10	4.99725e-11	4.02238e-11	1.70651e-11
850.345	47	2.50709e-10	8.15334e-10	4.33947e-10	1.21553e-09	1.19848e-09	1.57561e-09	7.70565e-10	1.59673e-09	2.00598e-09	4.84281e-09	4.37736e-09	5.78979e-09	1.40721e-08	1.75355e-08	2.66336e-08	4.12679e-08	3.86141e-08	6.7545e-08	3.94524e-08	5.55758e-08	1.41225e-08	3.96688e-08	7.33011e-09	7.40706e-09	4.19108e-09	3.68088e-09	4.23282e-09	1.08143e-09	1.6742e-09	7.76239e-10	6.40471e-10	3.40182e-10	4.50092e-10	6.39293e-10	6.35559e-10	4.94766e-10	3.90817e-10	3.54589e-10	4.96047e-11	4.09401e-11	1.63478e-11
868.832	48	2.52893e-10	8.33752e-10	4.43865e-10	1.29236e-09	1.2727e-09	1.61617e-09	7.95515e-10	1.62792e-09	1.9028e-09	4.80134e-09	4.33015e-09	5.64372e-09	1.40656e-08	1.79458e-08	2.71731e-08	4.46147e-08	4.14522e-08	7.03399e-08	4.00759e-08	5.34563e-08	1.20171e-08	3.43768e-08	6.08898e-09	6.38503e-09	3.80389e-09	3.30215e-09	3.80779e-09	9.42301e-10	1.56704e-09	7.1058e-10	6.01663e-10	3.17576e-10	4.06298e-10	6.26081e-10	5.87321e-10	4.70334e-10	3.3793e-10	3.61723e-10	5.12961e-11	4.17529e-11	1.57401e-11
887.318	49	2.56905e-10	8.41234e-10	4.62854e-10	1.38885e-09	1.33919e-09	1.65648e-09	8.25363e-10	1.64069e-09	1.81863e-09	4.71442e-09	4.37805e-09	5.61765e-09	1.43287e-08	1.85436e-08	2.86639e-08	4.83348e-08	4.42555e-08	7.37304e-08	4.01804e-08	5.09161e-08	1.04067e-08	2.95833e-08	4.92923e-09	5.52319e-09	3.60117e-09	2.94105e-09	3.44718e-09	8.90728e-10	1.4046e-09	6.55824e-10	5.50354e-10	2.98008e-10	3.85355e-10	6.17177e-10	5.41752e-10	4.51204e-10	2.9696e-10	3.71956e-10	5.50561e-11	4.36791e-11	1.57838e-11
905.804	50	2.60666e-10	8.34092e-10	4.8256e-10	1.50585e-09	1.39806e-09	1.69183e-09	8.61202e-10	1.65519e-09	1.76662e-09	4.57858e-09	4.46986e-09	5.71968e-09	1.4508e-08	1.89809e-08	3.0253e-08	5.19947e-08	4.79164e-08	7.63906e-08	3.99518e-08	4.82514e-08	9.28963e-09	2.57126e-08	4.07533e-09	4.81845e-09	3.39857e-09	2.62689e-09	3.08538e-09	8.734e-10	1.23721e-09	6.01466e-10	5.10575e-10	2.74035e-10	3.65372e-10	6.01131e-10	5.10524e-10	4.41034e-10	2.63659e-10	3.93178e-10	5.98391e-11	4.52145e-11	1.65191e-11
924.29	51	2.64087e-10	8.10872e-10	5.05018e-10	1.62101e-09	1.43116e-09	1.73439e-09	9.07306e-10	1.66544e-09	1.77983e-09	4.42095e-09	4.56288e-09	5.97533e-09	1.44475e-08	1.95831e-08	3.25574e-08	5.55103e-08	5.14242e-08	7.83004e-08	3.87695e-08	4.53175e-08	8.57616e-09	2.23982e-08	3.47028e-09	4.28316e-09	3.2142e-09	2.3691e-09	2.77302e-09	8.70549e-10	1.07426e-09	5.55249e-10	4.85536e-10	2.54161e-10	3.60538e-10	5.83235e-10	4.84013e-10	4.39959e-10	2.40156e-10	4.08261e-10	6.4982e-11	4.69317e-11	1.71457e-11
942.775	52	2.66751e-10	7.89579e-10	5.28699e-10	1.70566e-09	1.44659e-09	1.77682e-09	9.44391e-10	1.69427e-09	1.83517e-09	4.19618e-09	4.56862e-09	6.30286e-09	1.44367e-08	2.00012e-08	3.50363e-08	5.88897e-08	5.46447e-08	7.90222e-08	3.69006e-08	4.18387e-08	8.15159e-09	1.88301e-08	3.03299e-09	3.80376e-09	2.99078e-09	2.16297e-09	2.49496e-09	8.80666e-10	9.53589e-10	5.26204e-10	4.62818e-10	2.45195e-10	3.56172e-10	5.65233e-10	4.62988e-10	4.41575e-10	2.33392e-10	4.05592e-10	6.82019e-11	5.01546e-11	1.85804e-11
961.26	53	2.71208e-10	7.60996e-10	5.54526e-10	1.75959e-09	1.44927e-09	1.79618e-09	9.92509e-10	1.73882e-09	1.90546e-09	3.89831e-09	4.50875e-09	6.72489e-09	1.44631e-08	2.05769e-08	3.6893e-08	6.18143e-08	5.82814e-08	7.89291e-08	3.46396e-08	3.75337e-08	8.00002e-09	1.56587e-08	2.71163e-09	3.36735e-09	2.72889e-09	1.96888e-09	2.26402e-09	8.648e-10	9.0983e-10	4.95952e-10	4.43208e-10	2.42069e-10	3.48689e-10	5.41465e-10	4.51325e-10	4.44849e-10	2.31392e-10	4.05524e-10	6.79083e-11	5.1904e-11	1.96194e-11
979.747	54	2.71033e-10	7.45325e-10	5.75787e-10	1.77175e-09	1.47724e-09	1.79177e-09	1.02887e-09	1.78951e-09	1.96868e-09	3.63187e-09	4.35596e-09	7.18289e-09	1.4309e-08	2.14201e-08	3.78127e-08	6.51118e-08	6.14304e-08	7.88649e-08	3.19113e-08	3.27896e-08	7.74585e-09	1.26612e-08	2.4606e-09	2.98963e-09	2.46231e-09	1.80731e-09	2.05367e-09	8.07169e-10	8.66087e-10	4.76383e-10	4.28167e-10	2.45874e-10	3.37209e-10	5.13671e-10	4.44676e-10	4.47607e-10	2.26382e-10	3.96871e-10	6.41283e-11	5.37971e-11	1.97393e-11
998.233	55	2.70343e-10	7.40554e-10	6.03979e-10	1.72812e-09	1.50708e-09	1.78726e-09	1.05999e-09	1.86772e-09	2.03219e-09	3.41387e-09	4.22218e-09	7.58716e-09	1.42578e-08	2.20623e-08	3.79452e-08	6.78698e-08	6.32718e-08	7.93061e-08	2.85338e-08	2.73559e-08	7.28051e-09	1.02165e-08	2.21503e-09	2.63553e-09	2.19565e-09	1.68521e-09	1.87399e-09	7.39408e-10	8.20229e-10	4.61615e-10	4.17894e-10	2.60539e-10	3.25159e-10	4.93923e-10	4.45087e-10	4.44247e-10	2.23424e-10	3.6592e-10	5.95163e-11	5.54287e-11	1.89634e-11
1016.72	56	2.66264e-10	7.4366e-10	6.3434e-10	1.68756e-09	1.55715e-09	1.75742e-09	1.08193e-09	1.96388e-09	2.11495e-09	3.26235e-09	4.21297e-09	7.86637e-09	1.45503e-08	2.25861e-08	3.83238e-08	6.995e-08	6.52161e-08	7.87876e-08	2.54743e-08	2.23048e-08	6.65795e-09	8.57212e-09	1.99024e-09	2.32542e-09	1.97868e-09	1.5641e-09	1.752e-09	6.66406e-10	7.68253e-10	4.36831e-10	4.14193e-10	2.75612e-10	3.09205e-10	4.591e-10	4.47901e-10	4.35586e-10	2.21015e-10	3.43339e-10	5.46025e-11	5.62286e-11	1.74424e-11
1035.2	57	2.76055e-10	7.63467e-10	6.6163e-10	1.65707e-09	1.65274e-09	1.78093e-09	1.09947e-09	2.06175e-09	2.2364e-09	3.15608e-09	4.29502e-09	7.98498e-09	1.49045e-08	2.32794e-08	3.92659e-08	7.19715e-08	6.67832e-08	7.92191e-08	2.25361e-08	1.76052e-08	5.84725e-09	7.60428e-09	1.79392e-09	2.05566e-09	1.82452e-09	1.50236e-09	1.64822e-09	5.995e-10	7.11624e-10	4.08082e-10	4.22154e-10	2.8536e-10	2.94605e-10	4.29462e-10	4.43509e-10	4.23761e-10	2.1516e-10	3.21391e-10	5.15128e-11	5.52826e-11	1.5477e-11
1053.69	58	2.8804e-10	7.79219e-10	6.86272e-10	1.68294e-09	1.73423e-09	1.88538e-09	1.11406e-09	2.16299e-09	2.40252e-09	3.11063e-09	4.47361e-09	7.99354e-09	1.54157e-08	2.39073e-08	4.24119e-08	7.36937e-08	6.8035e-08	7.85026e-08	2.00197e-08	1.39036e-08	4.98063e-09	6.90268e-09	1.61987e-09	1.84548e-09	1.73232e-09	1.4745e-09	1.58486e-09	5.61932e-10	6.65185e-10	3.79762e-10	4.34093e-10	2.93684e-10	2.93757e-10	4.16765e-10	4.3847e-10	4.09382e-10	2.12719e-10	2.99884e-10	5.05943e-11	5.4712e-11	1.3768e-11
1072.18	59	3.05373e-10	8.00779e-10	7.1202e-10	1.7812e-09	1.82094e-09	2.03426e-09	1.12416e-09	2.24902e-09	2.63631e-09	3.06316e-09	4.67164e-09	7.96104e-09	1.60603e-08	2.4867e-08	4.72812e-08	7.60008e-08	7.01656e-08	7.62769e-08	1.81164e-08	1.11761e-08	4.32515e-09	6.51772e-09	1.46892e-09	1.69058e-09	1.66787e-09	1.45687e-09	1.5688e-09	5.44249e-10	6.21932e-10	3.48168e-10	4.43483e-10	2.96179e-10	3.00273e-10	4.13231e-10	4.34781e-10	3.93181e-10	2.18929e-10	2.9106e-10	5.15674e-11	5.42176e-11	1.30376e-11
1090.66	60	3.27651e-10	8.27099e-10	7.37742e-10	1.93101e-09	1.93789e-09	2.25571e-09	1.14756e-09	2.3164e-09	2.87548e-09	3.04688e-09	4.79337e-09	8.02674e-09	1.6574e-08	2.66703e-08	5.351e-08	7.94482e-08	7.26506e-08	7.37121e-08	1.65456e-08	9.0207e-09	3.75315e-09	6.14576e-09	1.34316e-09	1.54608e-09	1.63272e-09	1.45316e-09	1.55724e-09	5.29922e-10	5.92546e-10	3.19399e-10	4.42524e-10	2.92707e-10	3.10277e-10	4.24302e-10	4.30693e-10	3.78159e-10	2.25636e-10	2.96755e-10	5.33341e-11	5.29126e-11	1.27612e-11
1109.15	61	3.37509e-10	8.64619e-10	7.59506e-10	2.08961e-09	2.03775e-09	2.51304e-09	1.17735e-09	2.38202e-09	3.11687e-09	3.07501e-09	4.84067e-09	8.17621e-09	1.67964e-08	2.84811e-08	5.94008e-08	8.34595e-08	7.42253e-08	7.00049e-08	1.52314e-08	7.6774e-09	3.27876e-09	5.67779e-09	1.23221e-09	1.46083e-09	1.60435e-09	1.47193e-09	1.5591e-09	5.21109e-10	5.82864e-10	3.03155e-10	4.26385e-10	2.89522e-10	3.18799e-10	4.49611e-10	4.29715e-10	3.65263e-10	2.35355e-10	2.95667e-10	5.52031e-11	5.3207e-11	1.34103e-11
1127.63	62	3.34449e-10	8.99821e-10	7.89402e-10	2.20655e-09	2.11343e-09	2.73715e-09	1.22391e-09	2.4353e-09	3.34027e-09	3.18334e-09	4.85493e-09	8.49787e-09	1.68494e-08	3.03936e-08	6.44949e-08	8.709e-08	7.46869e-08	6.48451e-08	1.39343e-08	6.77046e-09	2.90034e-09	5.23864e-09	1.16927e-09	1.40191e-09	1.60224e-09	1.46776e-09	1.57672e-09	5.10824e-10	5.76991e-10	2.92931e-10	4.06337e-10	2.87507e-10	3.29068e-10	4.75524e-10	4.24452e-10	3.50988e-10	2.4779e-10	3.01719e-10	5.69107e-11	5.41046e-11	1.41343e-11
1146.12	63	3.32625e-10	9.457e-10	8.1348e-10	2.29549e-09	2.22179e-09	2.9022e-09	1.28502e-09	2.49409e-09	3.52795e-09	3.44625e-09	4.89036e-09	8.87476e-09	1.66724e-08	3.24531e-08	6.89278e-08	8.99266e-08	7.34274e-08	5.96334e-08	1.24731e-08	6.11653e-09	2.48633e-09	4.87727e-09	1.15768e-09	1.35296e-09	1.61649e-09	1.46573e-09	1.591e-09	5.02615e-10	5.7949e-10	2.89531e-10	3.8604e-10	2.84566e-10	3.28466e-10	4.87261e-10	4.19497e-10	3.37533e-10	2.53879e-10	3.07547e-10	5.76886e-11	5.4595e-11	1.50025e-11
1164.6	64	3.28373e-10	9.87903e-10	8.36427e-10	2.32904e-09	2.30661e-09	3.03673e-09	1.36239e-09	2.58089e-09	3.7034e-09	3.74999e-09	5.05721e-09	9.1758e-09	1.67778e-08	3.43339e-08	7.20175e-08	9.1182e-08	7.01038e-08	5.37972e-08	1.09593e-08	5.60375e-09	2.11214e-09	4.49467e-09	1.19165e-09	1.34367e-09	1.62338e-09	1.46006e-09	1.61868e-09	4.98285e-10	5.93678e-10	2.89576e-10	3.65606e-10	2.80806e-10	3.22506e-10	4.86998e-10	4.09858e-10	3.31174e-10	2.58173e-10	3.08529e-10	5.81555e-11	5.45864e-11	1.5724e-11
1183.09	65	3.19037e-10	1.0272e-09	8.50566e-10	2.3605e-09	2.37089e-09	3.09672e-09	1.43701e-09	2.6777e-09	3.88588e-09	4.15196e-09	5.33992e-09	9.37342e-09	1.73217e-08	3.61729e-08	7.51928e-08	9.11333e-08	6.55857e-08	4.75305e-08	9.56626e-09	5.14345e-09	1.80378e-09	4.20209e-09	1.23241e-09	1.34302e-09	1.63515e-09	1.44166e-09	1.65893e-09	4.98505e-10	6.09885e-10	2.94449e-10	3.50136e-10	2.76724e-10	3.19803e-10	4.72763e-10	3.98086e-10	3.26931e-10	2.65084e-10	3.12996e-10	5.79022e-11	5.52682e-11	1.60625e-11
1201.58	66	3.2735e-10	1.06542e-09	8.61787e-10	2.42664e-09	2.45408e-09	3.16032e-09	1.52254e-09	2.79169e-09	4.07433e-09	4.59161e-09	5.70027e-09	9.50452e-09	1.84167e-08	3.8383e-08	7.8147e-08	9.02323e-08	6.1074e-08	4.20718e-08	8.22428e-09	4.6444e-09	1.56023e-09	4.04421e-09	1.27577e-09	1.32935e-09	1.64156e-09	1.42445e-09	1.69587e-09	5.02377e-10	6.26648e-10	2.99363e-10	3.37815e-10	2.70535e-10	3.13031e-10	4.53438e-10	3.87945e-10	3.2534e-10	2.65763e-10	3.2125e-10	5.79054e-11	5.4131e-11	1.6059e-11
1220.06	67	3.29814e-10	1.09994e-09	8.70682e-10	2.53474e-09	2.52992e-09	3.24442e-09	1.60419e-09	2.93724e-09	4.24214e-09	4.97945e-09	6.12038e-09	9.52826e-09	1.97531e-08	4.06752e-08	8.05191e-08	8.93239e-08	5.64681e-08	3.67359e-08	7.13948e-09	4.13307e-09	1.38389e-09	3.91104e-09	1.29878e-09	1.31428e-09	1.61966e-09	1.40885e-09	1.71714e-09	5.02522e-10	6.39305e-10	3.03265e-10	3.21505e-10	2.64516e-10	3.03942e-10	4.27278e-10	3.77477e-10	3.31303e-10	2.65821e-10	3.256e-10	5.73386e-11	5.26398e-11	1.59328e-11
1238.55	68	3.29156e-10	1.13896e-09	8.79486e-10	2.6648e-09	2.61037e-09	3.3356e-09	1.6637e-09	3.08321e-09	4.4124e-09	5.3042e-09	6.46466e-09	9.61918e-09	2.09017e-08	4.2708e-08	8.1815e-08	8.78028e-08	5.20232e-08	3.17059e-08	6.23376e-09	3.64346e-09	1.29135e-09	3.85842e-09	1.29509e-09	1.29422e-09	1.5987e-09	1.39466e-09	1.7161e-09	5.01175e-10	6.36869e-10	3.09618e-10	3.07838e-10	2.57115e-10	2.98899e-10	4.11433e-10	3.68973e-10	3.34919e-10	2.64928e-10	3.22378e-10	5.7405e-11	5.14451e-11	1.60893e-11
1257.03	69	3.31258e-10	1.16963e-09	8.95178e-10	2.81993e-09	2.69163e-09	3.46707e-09	1.71197e-09	3.22018e-09	4.56767e-09	5.61794e-09	6.69531e-09	9.82533e-09	2.1838e-08	4.44833e-08	8.27553e-08	8.56131e-08	4.75255e-08	2.7192e-08	5.47259e-09	3.22961e-09	1.23941e-09	3.89736e-09	1.29054e-09	1.27405e-09	1.58887e-09	1.39167e-09	1.68576e-09	4.93689e-10	6.22982e-10	3.12733e-10	3.00133e-10	2.5345e-10	2.94335e-10	4.06038e-10	3.61946e-10	3.33518e-10	2.58209e-10	3.1751e-10	5.71213e-11	4.95704e-11	1.6377e-11
1275.52	70	3.33816e-10	1.20329e-09	9.15277e-10	2.96037e-09	2.7971e-09	3.57032e-09	1.75226e-09	3.3477e-09	4.7317e-09	5.81169e-09	6.90451e-09	1.00423e-08	2.26335e-08	4.58138e-08	8.27126e-08	8.32862e-08	4.30647e-08	2.32754e-08	4.84235e-09	2.83294e-09	1.21367e-09	3.94631e-09	1.29029e-09	1.25861e-09	1.57551e-09	1.39766e-09	1.63302e-09	4.80861e-10	6.02069e-10	3.12594e-10	2.94906e-10	2.49262e-10	2.92412e-10	4.0532e-10	3.59749e-10	3.3964e-10	2.50425e-10	3.04174e-10	5.69326e-11	4.82029e-11	1.65457e-11
1294.01	71	3.33719e-10	1.23313e-09	9.4989e-10	3.08224e-09	2.92533e-09	3.64278e-09	1.78239e-09	3.44819e-09	4.87122e-09	5.95055e-09	6.97763e-09	1.03419e-08	2.4005e-08	4.65532e-08	8.16783e-08	8.04642e-08	3.88396e-08	1.96786e-08	4.23424e-09	2.57546e-09	1.21804e-09	3.99719e-09	1.28934e-09	1.24547e-09	1.5657e-09	1.39281e-09	1.56513e-09	4.63339e-10	5.82102e-10	3.09306e-10	2.93026e-10	2.46249e-10	2.96897e-10	4.12072e-10	3.59133e-10	3.4272e-10	2.42932e-10	2.88744e-10	5.65849e-11	4.67638e-11	1.68938e-11
1312.49	72	3.3594e-10	1.26384e-09	9.84772e-10	3.20356e-09	3.04167e-09	3.68244e-09	1.80496e-09	3.54976e-09	4.99094e-09	6.08033e-09	6.92323e-09	1.06934e-08	2.57282e-08	4.71619e-08	7.98585e-08	7.7012e-08	3.4945e-08	1.66126e-08	3.70643e-09	2.40273e-09	1.23047e-09	4.01874e-09	1.29394e-09	1.22255e-09	1.56066e-09	1.37422e-09	1.48247e-09	4.46973e-10	5.7019e-10	3.08654e-10	2.9147e-10	2.46009e-10	3.0084e-10	4.1883e-10	3.60947e-10	3.42264e-10	2.36908e-10	2.75293e-10	5.54508e-11	4.39374e-11	1.68313e-11
1330.98	73	3.37219e-10	1.28529e-09	1.02167e-09	3.29701e-09	3.15834e-09	3.70879e-09	1.82463e-09	3.63891e-09	5.07275e-09	6.1167e-09	6.8385e-09	1.08732e-08	2.83348e-08	4.74716e-08	7.7272e-08	7.33289e-08	3.15615e-08	1.40246e-08	3.24126e-09	2.26687e-09	1.24047e-09	3.96492e-09	1.30009e-09	1.1768e-09	1.55027e-09	1.34875e-09	1.40823e-09	4.33967e-10	5.61763e-10	3.06496e-10	2.88785e-10	2.42976e-10	3.04411e-10	4.17942e-10	3.5794e-10	3.4347e-10	2.34013e-10	2.65206e-10	5.43247e-11	4.0874e-11	1.63281e-11
1349.46	74	3.34765e-10	1.32061e-09	1.05847e-09	3.37834e-09	3.27346e-09	3.73193e-09	1.84683e-09	3.73155e-09	5.1346e-09	6.14618e-09	6.70941e-09	1.09853e-08	3.12529e-08	4.7755e-08	7.49229e-08	6.86955e-08	2.85928e-08	1.15936e-08	2.84515e-09	2.16885e-09	1.24882e-09	3.88268e-09	1.28398e-09	1.1118e-09	1.53606e-09	1.30096e-09	1.34327e-09	4.25612e-10	5.59287e-10	3.02055e-10	2.81209e-10	2.39182e-10	3.07175e-10	4.09386e-10	3.57447e-10	3.41442e-10	2.3361e-10	2.54486e-10	5.28217e-11	3.75343e-11	1.61719e-11
1367.95	75	3.32325e-10	1.34947e-09	1.08461e-09	3.47421e-09	3.33987e-09	3.78353e-09	1.87278e-09	3.83172e-09	5.24513e-09	6.19657e-09	6.62054e-09	1.11596e-08	3.37617e-08	4.81329e-08	7.30076e-08	6.32842e-08	2.5839e-08	9.61896e-09	2.56597e-09	2.09238e-09	1.25834e-09	3.75895e-09	1.26549e-09	1.03632e-09	1.5272e-09	1.25109e-09	1.29569e-09	4.17768e-10	5.58311e-10	2.97126e-10	2.70544e-10	2.36267e-10	3.05969e-10	4.02397e-10	3.51968e-10	3.32415e-10	2.33513e-10	2.47631e-10	5.16024e-11	3.38491e-11	1.62053e-11
1386.43	76	3.31023e-10	1.37778e-09	1.09397e-09	3.56205e-09	3.40855e-09	3.85015e-09	1.91076e-09	3.89168e-09	5.38825e-09	6.27467e-09	6.6616e-09	1.1312e-08	3.55438e-08	4.87276e-08	7.17704e-08	5.73144e-08	2.35504e-08	7.94238e-09	2.34244e-09	2.01493e-09	1.2616e-09	3.68634e-09	1.24455e-09	9.70111e-10	1.50507e-09	1.21412e-09	1.26744e-09	4.12896e-10	5.57879e-10	2.88035e-10	2.64943e-10	2.33087e-10	3.03977e-10	3.96745e-10	3.4392e-10	3.21193e-10	2.3325e-10	2.41756e-10	5.11382e-11	3.09845e-11	1.64167e-11
1404.92	77	3.29191e-10	1.40982e-09	1.10348e-09	3.64678e-09	3.49193e-09	3.9345e-09	1.96628e-09	3.94489e-09	5.58458e-09	6.41049e-09	6.79818e-09	1.158e-08	3.69898e-08	4.92721e-08	7.10001e-08	5.09269e-08	2.13342e-08	6.63739e-09	2.12226e-09	1.95472e-09	1.25305e-09	3.66056e-09	1.22875e-09	9.26577e-10	1.47688e-09	1.18159e-09	1.27076e-09	4.04738e-10	5.44257e-10	2.74155e-10	2.61945e-10	2.32145e-10	3.02779e-10	3.93135e-10	3.41577e-10	3.13068e-10	2.30632e-10	2.31557e-10	5.2396e-11	2.90121e-11	1.72254e-11
1423.41	78	3.24973e-10	1.43675e-09	1.11681e-09	3.74457e-09	3.541e-09	4.01054e-09	2.03087e-09	4.03248e-09	5.86748e-09	6.66073e-09	6.96501e-09	1.20108e-08	3.78024e-08	4.96676e-08	6.96973e-08	4.48872e-08	1.91625e-08	5.73019e-09	1.95197e-09	1.92699e-09	1.26602e-09	3.66249e-09	1.23393e-09	9.04338e-10	1.44487e-09	1.14908e-09	1.26813e-09	3.96214e-10	5.32198e-10	2.593e-10	2.63212e-10	2.35241e-10	3.00751e-10	3.89193e-10	3.36007e-10	3.03475e-10	2.2642e-10	2.20985e-10	5.46113e-11	2.67757e-11	1.8139e-11
1441.89	79	3.21985e-10	1.46039e-09	1.12332e-09	3.80906e-09	3.58939e-09	4.09426e-09	2.09858e-09	4.11017e-09	6.15935e-09	6.95829e-09	7.16122e-09	1.25271e-08	3.87904e-08	4.95871e-08	6.70011e-08	3.92997e-08	1.71613e-08	5.09078e-09	1.8212e-09	1.92249e-09	1.27121e-09	3.68159e-09	1.24506e-09	9.03238e-10	1.399e-09	1.11691e-09	1.25752e-09	3.87762e-10	5.19195e-10	2.4876e-10	2.68532e-10	2.382e-10	2.9789e-10	3.84502e-10	3.31665e-10	2.95048e-10	2.22757e-10	2.11165e-10	5.69894e-11	2.45197e-11	1.8791e-11
1460.38	80	3.19647e-10	1.48306e-09	1.14569e-09	3.88371e-09	3.63382e-09	4.23367e-09	2.17735e-09	4.19697e-09	6.40485e-09	7.21047e-09	7.28593e-09	1.31634e-08	4.03648e-08	4.87722e-08	6.30472e-08	3.43954e-08	1.51227e-08	4.67866e-09	1.72037e-09	1.95766e-09	1.26801e-09	3.66063e-09	1.25591e-09	9.04455e-10	1.34415e-09	1.07068e-09	1.24627e-09	3.781e-10	5.02567e-10	2.40377e-10	2.72054e-10	2.42267e-10	2.97161e-10	3.7276e-10	3.29993e-10	2.90983e-10	2.18883e-10	2.00082e-10	5.9597e-11	2.23646e-11	1.92395e-11
1478.86	81	3.17609e-10	1.51177e-09	1.17665e-09	3.94851e-09	3.6521e-09	4.33976e-09	2.24384e-09	4.33634e-09	6.66586e-09	7.44033e-09	7.44025e-09	1.3835e-08	4.16659e-08	4.73269e-08	5.81497e-08	3.02036e-08	1.3213e-08	4.35795e-09	1.67959e-09	2.00946e-09	1.27047e-09	3.55609e-09	1.26616e-09	9.12613e-10	1.2846e-09	1.01248e-09	1.21675e-09	3.68046e-10	4.93279e-10	2.36199e-10	2.71025e-10	2.44385e-10	2.92e-10	3.55936e-10	3.2759e-10	2.88667e-10	2.16913e-10	1.90386e-10	6.13183e-11	1.9674e-11	1.97068e-11
1497.35	82	3.20228e-10	1.53998e-09	1.19765e-09	4.02405e-09	3.68337e-09	4.4656e-09	2.31366e-09	4.44162e-09	6.86988e-09	7.63216e-09	7.68665e-09	1.44775e-08	4.26857e-08	4.53151e-08	5.28169e-08	2.67483e-08	1.15849e-08	4.08398e-09	1.67262e-09	2.06482e-09	1.26965e-09	3.44442e-09	1.26667e-09	9.19365e-10	1.23101e-09	9.57569e-10	1.17658e-09	3.60949e-10	4.89478e-10	2.36393e-10	2.68784e-10	2.43098e-10	2.82229e-10	3.434e-10	3.24567e-10	2.84283e-10	2.15401e-10	1.83391e-10	6.1893e-11	1.74388e-11	2.01709e-11
1515.83	83	3.24656e-10	1.57513e-09	1.21493e-09	4.14873e-09	3.73198e-09	4.62093e-09	2.37708e-09	4.51679e-09	6.99078e-09	7.74211e-09	8.08212e-09	1.50902e-08	4.33899e-08	4.32395e-08	4.80382e-08	2.34456e-08	1.01608e-08	3.85799e-09	1.68642e-09	2.11122e-09	1.25965e-09	3.36135e-09	1.24293e-09	9.26001e-10	1.17365e-09	8.9988e-10	1.14531e-09	3.55016e-10	4.89586e-10	2.37021e-10	2.63432e-10	2.39233e-10	2.76181e-10	3.31049e-10	3.25069e-10	2.8446e-10	2.13615e-10	1.74371e-10	6.2183e-11	1.65685e-11	2.05744e-11
1534.32	84	3.29942e-10	1.60856e-09	1.22911e-09	4.25725e-09	3.78915e-09	4.71134e-09	2.4357e-09	4.57346e-09	7.10458e-09	7.84439e-09	8.62245e-09	1.57282e-08	4.31257e-08	4.1144e-08	4.39677e-08	2.04652e-08	8.89773e-09	3.63847e-09	1.70856e-09	2.15994e-09	1.2553e-09	3.30082e-09	1.21943e-09	9.2185e-10	1.13363e-09	8.50037e-10	1.10463e-09	3.50036e-10	4.91418e-10	2.36032e-10	2.57827e-10	2.3536e-10	2.68875e-10	3.22604e-10	3.26245e-10	2.83431e-10	2.09514e-10	1.65983e-10	6.3136e-11	1.71629e-11	2.10314e-11
1552.81	85	3.38745e-10	1.63485e-09	1.24333e-09	4.34096e-09	3.86198e-09	4.79891e-09	2.4801e-09	4.60754e-09	7.25188e-09	8.04006e-09	9.13833e-09	1.62859e-08	4.19292e-08	3.9095e-08	4.02158e-08	1.76615e-08	7.84018e-09	3.47606e-09	1.74135e-09	2.19954e-09	1.26827e-09	3.31487e-09	1.17842e-09	9.05335e-10	1.10545e-09	8.14496e-10	1.0507e-09	3.50416e-10	5.0122e-10	2.36017e-10	2.54185e-10	2.3268e-10	2.63154e-10	3.18501e-10	3.29363e-10	2.78548e-10	2.03362e-10	1.57091e-10	6.40833e-11	1.90425e-11	2.14793e-11
1571.29	86	3.47615e-10	1.6358e-09	1.25704e-09	4.40532e-09	3.92089e-09	4.93499e-09	2.49278e-09	4.68835e-09	7.31566e-09	8.28237e-09	9.6761e-09	1.674e-08	4.07542e-08	3.70712e-08	3.69103e-08	1.48202e-08	6.83654e-09	3.40426e-09	1.79242e-09	2.21451e-09	1.26195e-09	3.34899e-09	1.12415e-09	8.68321e-10	1.08522e-09	7.84773e-10	9.93579e-10	3.47453e-10	5.07689e-10	2.36801e-10	2.52143e-10	2.3098e-10	2.66955e-10	3.14249e-10	3.32181e-10	2.73683e-10	1.93808e-10	1.48638e-10	6.61872e-11	2.17683e-11	2.15839e-11
1589.78	87	3.52626e-10	1.62769e-09	1.27734e-09	4.38527e-09	4.00105e-09	5.06636e-09	2.47389e-09	4.83146e-09	7.4071e-09	8.61897e-09	1.01802e-08	1.68046e-08	3.94856e-08	3.47597e-08	3.37779e-08	1.24588e-08	5.96033e-09	3.38099e-09	1.8547e-09	2.23045e-09	1.25431e-09	3.36655e-09	1.06417e-09	8.14858e-10	1.07006e-09	7.59589e-10	9.38528e-10	3.47571e-10	5.12361e-10	2.35026e-10	2.50194e-10	2.29607e-10	2.70007e-10	3.08729e-10	3.33733e-10	2.65141e-10	1.82639e-10	1.43359e-10	6.98882e-11	2.4283e-11	2.15152e-11
1608.26	88	3.56015e-10	1.62571e-09	1.29547e-09	4.31618e-09	4.09288e-09	5.22122e-09	2.44085e-09	4.99768e-09	7.65881e-09	9.05507e-09	1.06202e-08	1.66231e-08	3.82228e-08	3.22332e-08	3.07616e-08	1.05572e-08	5.24405e-09	3.41231e-09	1.9275e-09	2.22863e-09	1.24722e-09	3.33278e-09	9.98403e-10	7.67283e-10	1.05536e-09	7.39454e-10	8.97245e-10	3.45557e-10	5.12841e-10	2.33582e-10	2.47806e-10	2.28368e-10	2.69032e-10	3.05054e-10	3.29263e-10	2.55705e-10	1.72775e-10	1.41439e-10	7.37342e-11	2.56436e-11	2.13279e-11
1626.75	89	3.58558e-10	1.61724e-09	1.30707e-09	4.30313e-09	4.1998e-09	5.44577e-09	2.41447e-09	5.22472e-09	7.87945e-09	9.44921e-09	1.11644e-08	1.61602e-08	3.72088e-08	2.97237e-08	2.77122e-08	9.0857e-09	4.69444e-09	3.43978e-09	2.00082e-09	2.20805e-09	1.2181e-09	3.28856e-09	9.41439e-10	7.25671e-10	1.02489e-09	7.17785e-10	8.71103e-10	3.43048e-10	5.10888e-10	2.3122e-10	2.43731e-10	2.24389e-10	2.6745e-10	2.99349e-10	3.20873e-10	2.46689e-10	1.63062e-10	1.4002e-10	7.74521e-11	2.62049e-11	2.07554e-11
1645.24	90	3.52736e-10	1.61891e-09	1.30417e-09	4.29017e-09	4.34653e-09	5.6358e-09	2.40744e-09	5.46288e-09	8.22873e-09	9.84491e-09	1.1795e-08	1.55896e-08	3.63345e-08	2.76559e-08	2.47816e-08	7.9226e-09	4.25887e-09	3.45677e-09	2.0527e-09	2.16396e-09	1.17822e-09	3.24145e-09	8.84947e-10	7.0546e-10	9.87231e-10	6.9525e-10	8.64766e-10	3.4115e-10	5.04704e-10	2.25889e-10	2.3917e-10	2.18874e-10	2.57672e-10	2.92594e-10	3.1045e-10	2.37378e-10	1.56879e-10	1.3812e-10	8.09061e-11	2.60104e-11	2.03079e-11
1663.72	91	3.50208e-10	1.64522e-09	1.29696e-09	4.3628e-09	4.49628e-09	5.80891e-09	2.44067e-09	5.66151e-09	8.66137e-09	1.0209e-08	1.24198e-08	1.53731e-08	3.48288e-08	2.59391e-08	2.18997e-08	6.98901e-09	3.89722e-09	3.46773e-09	2.07055e-09	2.11219e-09	1.14789e-09	3.16627e-09	8.45832e-10	7.00284e-10	9.4967e-10	6.80724e-10	8.73138e-10	3.38802e-10	4.95548e-10	2.17804e-10	2.34099e-10	2.14571e-10	2.42533e-10	2.8492e-10	2.99532e-10	2.29223e-10	1.52169e-10	1.33997e-10	8.3146e-11	2.62487e-11	2.00444e-11
1682.21	92	3.51617e-10	1.67387e-09	1.3003e-09	4.53255e-09	4.63557e-09	5.98443e-09	2.51401e-09	5.87745e-09	9.08903e-09	1.05309e-08	1.32935e-08	1.54686e-08	3.2896e-08	2.4457e-08	1.93581e-08	6.0458e-09	3.61035e-09	3.46131e-09	2.08562e-09	2.051e-09	1.11916e-09	3.08821e-09	8.19607e-10	7.05602e-10	9.07993e-10	6.71795e-10	8.80286e-10	3.37891e-10	4.90084e-10	2.1112e-10	2.32082e-10	2.10319e-10	2.29882e-10	2.7257e-10	2.90458e-10	2.21597e-10	1.48159e-10	1.26421e-10	8.42036e-11	2.7374e-11	1.9761e-11
1700.69	93	3.48772e-10	1.70541e-09	1.31599e-09	4.72134e-09	4.73693e-09	6.09703e-09	2.6123e-09	6.11395e-09	9.44943e-09	1.09543e-08	1.42645e-08	1.58542e-08	3.03523e-08	2.31767e-08	1.70832e-08	5.20273e-09	3.37374e-09	3.42174e-09	2.07138e-09	1.97926e-09	1.09855e-09	3.00797e-09	8.09098e-10	7.04476e-10	8.77928e-10	6.69259e-10	8.80129e-10	3.40062e-10	4.86591e-10	2.06541e-10	2.33206e-10	2.07272e-10	2.16925e-10	2.60672e-10	2.8301e-10	2.11392e-10	1.44867e-10	1.18594e-10	8.41889e-11	2.90426e-11	1.94572e-11
1719.18	94	3.50118e-10	1.7479e-09	1.35e-09	4.94917e-09	4.81093e-09	6.19256e-09	2.72533e-09	6.36475e-09	9.67044e-09	1.14132e-08	1.53454e-08	1.65795e-08	2.71946e-08	2.17375e-08	1.49362e-08	4.56794e-09	3.17964e-09	3.43867e-09	2.05294e-09	1.92567e-09	1.09538e-09	2.92118e-09	8.00564e-10	6.97531e-10	8.57792e-10	6.76128e-10	8.86601e-10	3.46178e-10	4.82433e-10	2.033e-10	2.36236e-10	2.07745e-10	2.05533e-10	2.51114e-10	2.7905e-10	2.00297e-10	1.41667e-10	1.11594e-10	8.41945e-11	3.0996e-11	1.94102e-11
1737.66	95	3.53285e-10	1.77513e-09	1.39779e-09	5.12123e-09	4.87646e-09	6.3025e-09	2.86322e-09	6.6507e-09	9.64827e-09	1.19605e-08	1.63654e-08	1.71869e-08	2.38741e-08	1.9974e-08	1.30733e-08	4.09072e-09	3.05155e-09	3.44109e-09	2.04818e-09	1.88651e-09	1.08732e-09	2.83255e-09	8.0468e-10	6.84923e-10	8.46787e-10	6.92651e-10	8.79913e-10	3.55428e-10	4.76311e-10	2.00813e-10	2.38667e-10	2.09418e-10	1.99178e-10	2.44451e-10	2.75343e-10	1.88361e-10	1.38429e-10	1.06941e-10	8.39817e-11	3.30779e-11	1.93116e-11
1756.15	96	3.49103e-10	1.78085e-09	1.44318e-09	5.24762e-09	4.92014e-09	6.43974e-09	2.98673e-09	6.94343e-09	9.54751e-09	1.26126e-08	1.72205e-08	1.73442e-08	2.09055e-08	1.80679e-08	1.13104e-08	3.90866e-09	2.96979e-09	3.44089e-09	2.04306e-09	1.8528e-09	1.08173e-09	2.74988e-09	8.003e-10	6.67921e-10	8.50693e-10	7.09873e-10	8.62535e-10	3.67994e-10	4.64471e-10	1.97846e-10	2.35931e-10	2.09719e-10	1.93981e-10	2.41842e-10	2.74537e-10	1.76385e-10	1.35746e-10	1.04042e-10	8.24522e-11	3.44491e-11	1.93238e-11
1774.63	97	3.4293e-10	1.78377e-09	1.46816e-09	5.35018e-09	4.94129e-09	6.5675e-09	3.10863e-09	7.17076e-09	9.44306e-09	1.31339e-08	1.78502e-08	1.73651e-08	1.84528e-08	1.61908e-08	9.68764e-09	3.9199e-09	2.90288e-09	3.47656e-09	2.03708e-09	1.83073e-09	1.07425e-09	2.66542e-09	7.88399e-10	6.49061e-10	8.60104e-10	7.21794e-10	8.561e-10	3.7533e-10	4.50217e-10	1.92311e-10	2.28079e-10	2.08568e-10	1.91299e-10	2.42918e-10	2.7221e-10	1.69384e-10	1.33793e-10	1.03858e-10	8.07499e-11	3.55326e-11	1.96949e-11
1793.12	98	3.39796e-10	1.77045e-09	1.48533e-09	5.41297e-09	5.03105e-09	6.77173e-09	3.20562e-09	7.38108e-09	9.60242e-09	1.36438e-08	1.81906e-08	1.7115e-08	1.67043e-08	1.43726e-08	8.22299e-09	4.02675e-09	2.87617e-09	3.50537e-09	2.03968e-09	1.83365e-09	1.04533e-09	2.56275e-09	7.86916e-10	6.37941e-10	8.68978e-10	7.30362e-10	8.48843e-10	3.77793e-10	4.35755e-10	1.83985e-10	2.16896e-10	2.05333e-10	1.88331e-10	2.4218e-10	2.71448e-10	1.65e-10	1.329e-10	1.0528e-10	7.8406e-11	3.65976e-11	2.02172e-11
1811.61	99	3.30794e-10	1.75512e-09	1.48879e-09	5.49424e-09	5.11411e-09	7.00737e-09	3.29489e-09	7.61672e-09	1.03562e-08	1.43461e-08	1.86003e-08	1.66538e-08	1.53736e-08	1.28434e-08	6.97399e-09	4.22102e-09	2.86467e-09	3.5455e-09	2.03255e-09	1.80549e-09	1.01985e-09	2.46211e-09	7.84141e-10	6.30006e-10	8.82962e-10	7.25481e-10	8.388e-10	3.7631e-10	4.23588e-10	1.77589e-10	2.04927e-10	1.98531e-10	1.85728e-10	2.38245e-10	2.73831e-10	1.63652e-10	1.3362e-10	1.0713e-10	7.52796e-11	3.70839e-11	2.0887e-11
1830.09	100	3.24947e-10	1.74968e-09	1.49911e-09	5.63047e-09	5.19598e-09	7.23339e-09	3.34151e-09	7.92344e-09	1.16153e-08	1.52173e-08	1.90649e-08	1.62505e-08	1.43938e-08	1.16191e-08	5.96357e-09	4.35097e-09	2.84824e-09	3.61734e-09	2.01179e-09	1.7817e-09	9.9811e-10	2.36823e-09	7.87762e-10	6.19859e-10	8.9545e-10	7.08407e-10	8.35976e-10	3.67637e-10	4.14441e-10	1.73164e-10	1.95712e-10	1.94732e-10	1.83908e-10	2.3432e-10	2.76734e-10	1.66296e-10	1.3474e-10	1.11213e-10	7.21527e-11	3.72541e-11	2.18305e-11
1848.58	101	3.20644e-10	1.76091e-09	1.51734e-09	5.73756e-09	5.34086e-09	7.48037e-09	3.41542e-09	8.33801e-09	1.31101e-08	1.63051e-08	1.93715e-08	1.58387e-08	1.35326e-08	1.0582e-08	5.24271e-09	4.40164e-09	2.8437e-09	3.71093e-09	1.97644e-09	1.77091e-09	9.58949e-10	2.31039e-09	7.92399e-10	6.15336e-10	9.05337e-10	6.92131e-10	8.35573e-10	3.55883e-10	4.06929e-10	1.69807e-10	1.90302e-10	1.92973e-10	1.81051e-10	2.27977e-10	2.80837e-10	1.70328e-10	1.36904e-10	1.15674e-10	6.97465e-11	3.69914e-11	2.28059e-11
1867.07	102	3.14173e-10	1.79416e-09	1.53909e-09	5.81055e-09	5.48792e-09	7.76096e-09	3.49025e-09	8.79594e-09	1.47023e-08	1.78146e-08	1.94461e-08	1.5446e-08	1.25414e-08	9.613e-09	4.82948e-09	4.38062e-09	2.84039e-09	3.7463e-09	1.9142e-09	1.74901e-09	9.28785e-10	2.2821e-09	7.95952e-10	6.09981e-10	9.06681e-10	6.73384e-10	8.20358e-10	3.43357e-10	4.02965e-10	1.68339e-10	1.87769e-10	1.93994e-10	1.80275e-10	2.21411e-10	2.85623e-10	1.71216e-10	1.38694e-10	1.20459e-10	6.64472e-11	3.61707e-11	2.38458e-11
1885.55	103	3.14091e-10	1.83797e-09	1.56703e-09	5.88789e-09	5.62904e-09	7.89952e-09	3.5743e-09	9.20509e-09	1.59741e-08	1.91522e-08	1.93091e-08	1.50332e-08	1.15333e-08	8.68859e-09	4.57919e-09	4.28274e-09	2.81997e-09	3.7446e-09	1.83014e-09	1.72896e-09	9.13063e-10	2.29052e-09	7.9208e-10	6.02221e-10	8.98129e-10	6.60678e-10	8.08706e-10	3.26685e-10	3.99446e-10	1.67985e-10	1.87465e-10	1.97282e-10	1.81267e-10	2.18018e-10	2.86277e-10	1.72315e-10	1.38778e-10	1.26272e-10	6.30667e-11	3.51073e-11	2.48027e-11
1904.04	104	3.14567e-10	1.87319e-09	1.58807e-09	5.9197e-09	5.83163e-09	8.02452e-09	3.68154e-09	9.57536e-09	1.67609e-08	2.02777e-08	1.85789e-08	1.44758e-08	1.04913e-08	7.76094e-09	4.45556e-09	4.1624e-09	2.8063e-09	3.69967e-09	1.72791e-09	1.69406e-09	8.92649e-10	2.29881e-09	7.89424e-10	6.0154e-10	8.78752e-10	6.59783e-10	8.02057e-10	3.09782e-10	3.97096e-10	1.65689e-10	1.87766e-10	1.98399e-10	1.84139e-10	2.17061e-10	2.83609e-10	1.7255e-10	1.37946e-10	1.3371e-10	5.95651e-11	3.40204e-11	2.55394e-11
1922.52	105	3.14103e-10	1.91908e-09	1.58797e-09	5.9696e-09	6.06496e-09	8.05666e-09	3.7974e-09	9.81205e-09	1.72568e-08	2.117e-08	1.76808e-08	1.38126e-08	9.46256e-09	6.78946e-09	4.42683e-09	4.03376e-09	2.80803e-09	3.59418e-09	1.62225e-09	1.64988e-09	8.93278e-10	2.29689e-09	7.89377e-10	5.99057e-10	8.52087e-10	6.63682e-10	7.89251e-10	2.93549e-10	3.91887e-10	1.65143e-10	1.86729e-10	1.98471e-10	1.86495e-10	2.13712e-10	2.80892e-10	1.72414e-10	1.37796e-10	1.39617e-10	5.62353e-11	3.25727e-11	2.60383e-11
1941.01	106	3.14915e-10	1.9529e-09	1.57825e-09	6.06571e-09	6.24133e-09	8.0486e-09	3.92328e-09	1.00044e-08	1.76441e-08	2.147e-08	1.68442e-08	1.29347e-08	8.46689e-09	5.80523e-09	4.41286e-09	3.93244e-09	2.82673e-09	3.48184e-09	1.53543e-09	1.58625e-09	9.04223e-10	2.27331e-09	7.92577e-10	5.88123e-10	8.26194e-10	6.66672e-10	7.79758e-10	2.78875e-10	3.83612e-10	1.73198e-10	1.83818e-10	1.97911e-10	1.86684e-10	2.12423e-10	2.7598e-10	1.73086e-10	1.37349e-10	1.46252e-10	5.37525e-11	3.13123e-11	2.59042e-11
1959.49	107	3.14275e-10	1.97664e-09	1.57245e-09	6.20279e-09	6.45245e-09	8.12984e-09	4.07335e-09	1.02351e-08	1.80392e-08	2.13949e-08	1.5908e-08	1.19297e-08	7.59466e-09	4.99604e-09	4.37997e-09	3.89679e-09	2.86569e-09	3.42815e-09	1.46614e-09	1.52564e-09	9.05543e-10	2.23457e-09	7.9912e-10	5.7951e-10	8.10377e-10	6.72553e-10	7.72147e-10	2.64674e-10	3.7451e-10	1.93036e-10	1.7865e-10	1.96852e-10	1.84838e-10	2.10457e-10	2.68173e-10	1.75858e-10	1.39797e-10	1.51542e-10	5.26196e-11	3.0139e-11	2.52854e-11
1977.98	108	3.10417e-10	2.0229e-09	1.56082e-09	6.35779e-09	6.64921e-09	8.2594e-09	4.28025e-09	1.05388e-08	1.8566e-08	2.11455e-08	1.50704e-08	1.08437e-08	6.86165e-09	4.29034e-09	4.35072e-09	3.90033e-09	2.90018e-09	3.4116e-09	1.42775e-09	1.48046e-09	9.0733e-10	2.20621e-09	8.04867e-10	5.61975e-10	8.04889e-10	6.74279e-10	7.59939e-10	2.49824e-10	3.63232e-10	2.13734e-10	1.70028e-10	1.96915e-10	1.8049e-10	2.04703e-10	2.62032e-10	1.78782e-10	1.42287e-10	1.53909e-10	5.26096e-11	2.89377e-11	2.46288e-11
1996.46	109	3.08775e-10	2.05058e-09	1.58478e-09	6.53366e-09	6.84429e-09	8.48643e-09	4.46136e-09	1.08014e-08	1.92228e-08	2.07196e-08	1.42718e-08	9.75844e-09	6.25204e-09	3.79226e-09	4.33403e-09	3.93795e-09	2.95448e-09	3.41096e-09	1.42461e-09	1.45592e-09	9.11911e-10	2.18152e-09	8.04289e-10	5.33722e-10	8.01552e-10	6.72645e-10	7.49383e-10	2.3598e-10	3.57103e-10	2.35177e-10	1.62274e-10	1.98425e-10	1.74578e-10	1.99441e-10	2.5046e-10	1.78048e-10	1.43472e-10	1.55232e-10	5.30497e-11	2.80054e-11	2.38952e-11
2014.95	110	3.09803e-10	2.07042e-09	1.6438e-09	6.73898e-09	7.10267e-09	8.74673e-09	4.68488e-09	1.11123e-08	1.96478e-08	2.00658e-08	1.33596e-08	8.67141e-09	5.68086e-09	3.4584e-09	4.30049e-09	4.04464e-09	3.01427e-09	3.45471e-09	1.42409e-09	1.44123e-09	9.00669e-10	2.14701e-09	7.99854e-10	5.0955e-10	7.99819e-10	6.71941e-10	7.54444e-10	2.24646e-10	3.546e-10	2.48882e-10	1.54295e-10	1.96493e-10	1.69629e-10	1.9445e-10	2.34648e-10	1.76684e-10	1.43669e-10	1.54121e-10	5.36881e-11	2.74728e-11	2.29223e-11
2033.44	111	3.13617e-10	2.10735e-09	1.73312e-09	6.97297e-09	7.42854e-09	9.03171e-09	4.8853e-09	1.12988e-08	1.99288e-08	1.94507e-08	1.23082e-08	7.73529e-09	5.194e-09	3.2873e-09	4.30051e-09	4.34276e-09	3.0512e-09	3.50915e-09	1.43271e-09	1.45281e-09	8.99017e-10	2.11686e-09	7.98925e-10	4.88187e-10	7.87767e-10	6.65205e-10	7.64529e-10	2.18498e-10	3.59247e-10	2.44042e-10	1.47713e-10	1.93172e-10	1.66092e-10	1.88284e-10	2.19834e-10	1.74964e-10	1.42356e-10	1.51398e-10	5.55398e-11	2.70105e-11	2.21541e-11
2051.92	112	3.23358e-10	2.13416e-09	1.86374e-09	7.25734e-09	7.81545e-09	9.30946e-09	5.05354e-09	1.13863e-08	1.99159e-08	1.87054e-08	1.12842e-08	6.85408e-09	4.71276e-09	3.26315e-09	4.30057e-09	4.66339e-09	3.10203e-09	3.53487e-09	1.45072e-09	1.46605e-09	8.91994e-10	2.08917e-09	8.02441e-10	4.69043e-10	7.63485e-10	6.61264e-10	7.89603e-10	2.21046e-10	3.68779e-10	2.27186e-10	1.44144e-10	1.88876e-10	1.62816e-10	1.84844e-10	2.04809e-10	1.73954e-10	1.41121e-10	1.47339e-10	5.73962e-11	2.64884e-11	2.10628e-11
2070.41	113	3.38313e-10	2.16108e-09	2.01023e-09	7.58914e-09	8.30721e-09	9.69129e-09	5.19725e-09	1.14423e-08	1.96876e-08	1.7926e-08	1.02355e-08	6.06305e-09	4.29937e-09	3.35441e-09	4.28859e-09	5.01155e-09	3.17477e-09	3.56899e-09	1.46598e-09	1.47135e-09	8.76048e-10	2.04655e-09	8.02756e-10	4.62725e-10	7.35202e-10	6.59692e-10	8.15883e-10	2.32562e-10	3.81329e-10	2.07598e-10	1.41442e-10	1.83361e-10	1.62836e-10	1.84286e-10	1.93968e-10	1.7354e-10	1.41918e-10	1.42605e-10	5.91234e-11	2.63883e-11	1.9847e-11
2088.89	114	3.58197e-10	2.23313e-09	2.17197e-09	8.06379e-09	8.86846e-09	1.00564e-08	5.31052e-09	1.13942e-08	1.93005e-08	1.717e-08	9.10961e-09	5.31283e-09	4.01086e-09	3.46351e-09	4.28266e-09	5.34243e-09	3.20559e-09	3.59688e-09	1.47041e-09	1.48667e-09	8.6688e-10	2.01615e-09	8.04028e-10	4.61451e-10	7.11531e-10	6.54425e-10	8.31351e-10	2.44189e-10	3.8912e-10	1.90691e-10	1.39933e-10	1.80417e-10	1.63675e-10	1.84052e-10	1.87945e-10	1.76489e-10	1.44697e-10	1.37618e-10	6.05714e-11	2.58654e-11	1.89455e-11
2107.38	115	3.82303e-10	2.33689e-09	2.34641e-09	8.67959e-09	9.56061e-09	1.05155e-08	5.42095e-09	1.12443e-08	1.88508e-08	1.6327e-08	8.07671e-09	4.62938e-09	3.87633e-09	3.54883e-09	4.31586e-09	5.46391e-09	3.23406e-09	3.5932e-09	1.49174e-09	1.50259e-09	8.44598e-10	1.99573e-09	8.01617e-10	4.574e-10	6.88813e-10	6.48884e-10	8.28072e-10	2.54374e-10	3.89339e-10	1.89941e-10	1.39422e-10	1.78002e-10	1.62689e-10	1.84672e-10	1.85144e-10	1.77229e-10	1.48391e-10	1.33665e-10	6.02982e-11	2.51783e-11	1.84217e-11
2125.87	116	4.12586e-10	2.48912e-09	2.52124e-09	9.50252e-09	1.04089e-08	1.1088e-08	5.53788e-09	1.09458e-08	1.82321e-08	1.54281e-08	7.14825e-09	4.05956e-09	3.92085e-09	3.60821e-09	4.37324e-09	5.36937e-09	3.24699e-09	3.59906e-09	1.51811e-09	1.50621e-09	8.21184e-10	1.97081e-09	7.85784e-10	4.55235e-10	6.72743e-10	6.45784e-10	8.13197e-10	2.59569e-10	3.82897e-10	2.03187e-10	1.40371e-10	1.75296e-10	1.61709e-10	1.84371e-10	1.82725e-10	1.75412e-10	1.52415e-10	1.32322e-10	5.84575e-11	2.45764e-11	1.85799e-11
2144.35	117	4.51176e-10	2.69617e-09	2.73575e-09	1.06702e-08	1.13624e-08	1.18092e-08	5.68075e-09	1.05542e-08	1.75374e-08	1.43874e-08	6.24708e-09	3.53846e-09	4.06923e-09	3.61557e-09	4.44772e-09	5.21002e-09	3.20381e-09	3.645e-09	1.54509e-09	1.51975e-09	8.00471e-10	1.94991e-09	7.63273e-10	4.54522e-10	6.63989e-10	6.40912e-10	7.9026e-10	2.62036e-10	3.71443e-10	2.17009e-10	1.42548e-10	1.72664e-10	1.60065e-10	1.82836e-10	1.82078e-10	1.71923e-10	1.53676e-10	1.3336e-10	5.58758e-11	2.38345e-11	1.89048e-11
2162.84	118	4.94216e-10	2.95061e-09	2.98644e-09	1.20841e-08	1.24588e-08	1.2708e-08	5.85179e-09	1.01209e-08	1.66479e-08	1.31922e-08	5.49021e-09	3.10088e-09	4.26435e-09	3.63262e-09	4.54662e-09	5.03614e-09	3.12694e-09	3.73079e-09	1.57429e-09	1.54609e-09	7.75265e-10	1.93267e-09	7.38141e-10	4.55625e-10	6.6019e-10	6.4203e-10	7.70163e-10	2.64699e-10	3.64025e-10	2.30128e-10	1.47015e-10	1.69236e-10	1.55164e-10	1.79473e-10	1.78903e-10	1.68005e-10	1.53089e-10	1.36024e-10	5.35691e-11	2.31278e-11	1.90719e-11
2181.32	119	5.41769e-10	3.26547e-09	3.28914e-09	1.37607e-08	1.36179e-08	1.37691e-08	6.05317e-09	9.72882e-09	1.55401e-08	1.19269e-08	4.84483e-09	2.73874e-09	4.45495e-09	3.70222e-09	4.62229e-09	4.86344e-09	3.04491e-09	3.87225e-09	1.60858e-09	1.59239e-09	7.51639e-10	1.89523e-09	7.11813e-10	4.64195e-10	6.65545e-10	6.53939e-10	7.67471e-10	2.69088e-10	3.62179e-10	2.30665e-10	1.51702e-10	1.6537e-10	1.49378e-10	1.73234e-10	1.75016e-10	1.64149e-10	1.51658e-10	1.42193e-10	5.1789e-11	2.26194e-11	1.89593e-11
2199.81	120	5.95291e-10	3.64463e-09	3.60599e-09	1.56363e-08	1.48198e-08	1.5021e-08	6.29339e-09	9.39953e-09	1.44349e-08	1.0622e-08	4.26357e-09	2.45407e-09	4.6427e-09	3.78875e-09	4.68386e-09	4.86907e-09	2.95784e-09	3.99989e-09	1.6225e-09	1.65102e-09	7.41586e-10	1.85586e-09	6.89523e-10	4.84882e-10	6.8819e-10	6.73963e-10	7.79733e-10	2.76082e-10	3.70875e-10	2.19416e-10	1.5692e-10	1.63349e-10	1.41836e-10	1.66708e-10	1.70067e-10	1.61006e-10	1.50575e-10	1.47831e-10	5.17121e-11	2.24704e-11	1.82457e-11
2218.29	121	6.44635e-10	4.05085e-09	3.95023e-09	1.7653e-08	1.61056e-08	1.62798e-08	6.62269e-09	9.36224e-09	1.3326e-08	9.32676e-09	3.85546e-09	2.24573e-09	4.81865e-09	3.89354e-09	4.71571e-09	4.92614e-09	2.89316e-09	4.07439e-09	1.62447e-09	1.71862e-09	7.21901e-10	1.81326e-09	6.80875e-10	5.15473e-10	7.17392e-10	7.03382e-10	8.0902e-10	2.8531e-10	3.86814e-10	2.10049e-10	1.62258e-10	1.63182e-10	1.32714e-10	1.6063e-10	1.63581e-10	1.6307e-10	1.53342e-10	1.54401e-10	5.23104e-11	2.26259e-11	1.70983e-11
2236.78	122	6.92475e-10	4.51666e-09	4.24263e-09	1.95424e-08	1.72849e-08	1.75925e-08	6.98844e-09	9.33013e-09	1.22299e-08	8.17224e-09	3.62669e-09	2.1415e-09	5.00941e-09	4.00771e-09	4.73202e-09	4.96508e-09	2.91748e-09	4.04412e-09	1.61943e-09	1.76074e-09	7.07792e-10	1.77459e-09	6.88869e-10	5.458e-10	7.52348e-10	7.45811e-10	8.50651e-10	2.94601e-10	4.08015e-10	2.05354e-10	1.69807e-10	1.6679e-10	1.23725e-10	1.57026e-10	1.59802e-10	1.69557e-10	1.59487e-10	1.61286e-10	5.43256e-11	2.38529e-11	1.62511e-11
2255.27	123	7.35757e-10	4.94928e-09	4.46726e-09	2.1232e-08	1.83137e-08	1.88189e-08	7.36937e-09	9.36469e-09	1.13327e-08	7.19781e-09	3.49665e-09	2.09094e-09	5.20358e-09	4.0701e-09	4.73643e-09	4.97846e-09	2.98757e-09	3.91088e-09	1.59836e-09	1.76337e-09	6.95799e-10	1.74264e-09	7.04559e-10	5.74355e-10	7.89711e-10	7.86646e-10	8.95955e-10	3.0329e-10	4.28607e-10	2.06758e-10	1.78394e-10	1.7363e-10	1.1564e-10	1.58308e-10	1.57034e-10	1.79065e-10	1.67125e-10	1.6648e-10	5.61711e-11	2.55101e-11	1.56409e-11
Phase Data (°)		Frequency (kHz)
Position on CA (µm)	Index Point	2	2.5	3	3.5	4	4.5	5	5.5	6	6.5	7	7.5	8	8.5	9	9.5	10	10.5	11	11.5	12	12.5	13	13.5	14	14.5	15	15.5	16	16.5	17	17.5	18	18.5	19	19.5	20	30	40	50	60
0	1	2.94407	-5.51359	27.2212	-12.0416	-3.2064	0.598655	4.54692	5.63799	-6.20177	1.30212	-7.39781	-10.591	-1.89565	-8.60349	3.01631	-7.20373	-4.25915	1.15365	7.06068	-8.58959	0.725777	-1.61223	0.18327	4.5087	-1.21317	-1.68159	-12.2926	9.57165	-1.92986	-2.30057	0.65873	11.7377	-4.0198	6.32181	0.840421	7.75228	-1.90766	-4.64029	-0.127195	-13.1159	-6.86409
18.486	2	3.31895	-4.24572	28.4471	-10.9896	-3.29541	2.05427	4.71281	4.41535	-6.94657	0.473853	-8.6825	-11.1026	-2.75504	-8.08956	2.23194	-7.50182	-4.18971	0.659331	7.14459	-9.88333	-0.284685	-2.99568	-0.164147	3.78621	-2.18804	-3.82353	-10.6091	8.06732	-3.97477	-3.89601	-0.239579	10.7341	-3.83822	5.67514	-1.14796	8.16528	-3.33341	-6.86246	-3.74081	-14.2388	-14.2846
36.9708	3	4.56202	-0.599566	30.2893	-11.2004	-1.65491	0.716412	5.88394	5.67305	-7.72703	-0.269061	-9.89315	-10.5644	-3.93502	-7.66726	1.09968	-7.97127	-4.1861	-0.101552	6.93739	-10.8947	-1.69121	-4.55025	-0.211745	2.52152	-2.90801	-5.95611	-10.4816	6.48589	-4.30856	-4.69347	-0.868247	9.89954	-5.10735	5.47137	-2.61135	8.18234	-5.37361	-10.1482	-11.6505	-15.9175	-21.1473
55.4576	4	5.38617	3.46434	35.5322	-10.3225	-0.71866	-0.156593	6.59587	8.65957	-8.41593	-1.99434	-12.6618	-12.0797	-5.48684	-7.08193	0.213133	-8.84251	-4.71085	-1.31887	5.97852	-13.2533	-5.88524	-6.96312	-1.34359	0.494088	-4.72326	-10.4241	-12.9322	4.96663	-7.20546	-7.191	-1.97492	8.90715	-8.71485	4.64295	-6.13651	6.83017	-8.15085	-16.8768	-22.4686	-24.6611	-33.9645
73.9436	5	5.76523	5.34524	40.4436	-11.6258	1.08516	-0.095451	7.99187	12.2575	-9.44388	-3.178	-14.9182	-12.2182	-7.21301	-6.91783	-1.27152	-9.63502	-5.91605	-2.8412	4.23249	-15.0567	-9.82134	-8.75506	-3.78332	-2.15184	-6.39565	-14.2971	-15.8895	2.56263	-8.52616	-9.22096	-3.45648	6.8599	-11.5597	3.25474	-9.32297	4.2721	-12.5866	-24.6723	-35.4711	-34.8922	-49.1218
92.4292	6	5.38716	7.55471	43.5644	-11.1287	1.52194	0.647952	6.79248	12.7387	-9.6692	-3.89962	-15.408	-12.9253	-8.94983	-7.78095	-3.25085	-10.3529	-7.65839	-4.27775	0.685178	-16.652	-14.5454	-11.2801	-5.91708	-5.8494	-9.1186	-18.2058	-17.6776	-0.382478	-10.3817	-12.0334	-6.60066	2.54404	-14.2166	0.11758	-14.5712	-0.0743069	-17.4543	-33.2914	-52.6655	-47.8922	-65.2624
110.914	7	6.4116	7.41855	48.6097	-12.2807	2.48836	0.802266	6.90417	15.8745	-10.6339	-5.36781	-15.5109	-13.5803	-10.7492	-9.70486	-3.98303	-12.0831	-9.74753	-5.44826	-2.64438	-18.0167	-19.6564	-12.983	-8.17158	-9.91615	-11.9422	-21.9675	-22.2731	-4.11843	-11.5144	-14.4378	-6.44401	-0.804356	-16.0728	-2.97361	-18.9576	-5.77522	-21.8617	-42.6465	-70.4953	-66.4844	-84.3317
129.399	8	8.94791	5.69086	50.3762	-13.3755	1.59972	4.15736	5.1086	15.1851	-10.4467	-5.78664	-15.0452	-15.6885	-12.2065	-12.3956	-4.02366	-14.5877	-12.9072	-6.74136	-6.19947	-19.9793	-24.064	-14.4455	-11.1078	-14.0265	-15.5883	-26.1989	-27.0356	-8.19321	-13.8061	-17.6167	-7.15183	-5.35246	-17.3341	-6.51894	-23.1829	-11.9362	-26.1203	-51.7258	-86.6833	-88.5827	-107.982
147.885	9	12.8388	3.00452	51.0327	-16.7189	1.41617	6.82692	4.62442	16.2696	-10.7798	-6.95061	-14.0809	-16.6291	-14.4681	-15.3366	-4.97642	-17.4087	-15.2149	-9.26648	-9.0866	-22.456	-26.7588	-15.1859	-13.6093	-17.838	-18.8717	-30.0608	-30.8309	-11.704	-16.0086	-21.0779	-6.95594	-9.88889	-16.9864	-9.81776	-27.6261	-17.3337	-30.1914	-61.3551	-105.034	-110.353	-134.489
166.372	10	15.7704	1.78893	50.0938	-18.6029	1.61987	8.72964	3.13705	14.9447	-10.7212	-6.84494	-14.8303	-17.8902	-17.165	-17.4088	-6.52728	-19.8964	-17.556	-12.598	-12.4444	-25.4476	-29.3838	-17.2129	-16.2712	-21.0805	-22.7597	-33.2403	-33.0569	-14.5279	-18.1324	-25.1609	-10.1833	-13.9608	-17.7625	-13.8043	-33.3812	-23.5871	-34.212	-71.2156	-125.809	-137.147	-161.998
184.857	11	15.7674	-1.23219	47.9802	-20.3207	3.01619	7.03536	3.12187	15.2103	-11.8418	-7.07334	-16.3561	-18.8454	-19.5023	-18.2136	-7.67484	-22.6864	-18.8403	-16.3759	-15.1345	-28.4464	-31.7754	-18.8222	-19.593	-22.4309	-25.4762	-36.4554	-36.2591	-17.7575	-21.2578	-29.0516	-14.2791	-18.3781	-21.52	-17.4036	-37.9944	-28.3871	-38.5206	-83.2393	-146.089	-162.785	-186.982
203.344	12	14.9878	-4.90812	46.2385	-20.4043	1.8577	4.27975	1.85458	13.242	-11.9552	-6.81969	-19.0117	-20.3532	-21.628	-18.4043	-9.35825	-24.6481	-20.7492	-20.5424	-17.5079	-31.4935	-33.7465	-20.8042	-22.8074	-23.7488	-28.8497	-40.0069	-39.5546	-19.2651	-24.9471	-33.3671	-22.2208	-23.2205	-27.1895	-22.6036	-43.1168	-31.7239	-42.9472	-96.3523	-166.047	-190.091	-202.162
221.83	13	11.0732	-10.6987	45.514	-20.0733	-0.626906	0.757984	1.67372	13.3121	-12.336	-7.47544	-21.9788	-21.3197	-23.6485	-18.2217	-11.7606	-25.4994	-22.1564	-24.9259	-19.6334	-34.1812	-35.8103	-21.9948	-26.3374	-24.5004	-31.6312	-42.6184	-41.4667	-20.0898	-28.9311	-37.4967	-30.8198	-27.814	-32.1537	-28.603	-48.452	-36.0588	-48.1427	-112.426	-187.653	-215.525	-210.596
240.314	14	5.90003	-15.6302	44.5264	-17.9024	-5.53669	-0.981731	-0.0967905	11.2003	-12.8518	-7.39995	-23.9967	-22.9597	-25.1759	-18.086	-13.8432	-26.2756	-23.3462	-27.3986	-21.3225	-36.7596	-38.3821	-24.984	-29.3565	-25.7294	-34.9877	-45.7434	-43.2942	-21.6397	-32.8958	-41.4975	-39.9577	-33.1877	-36.7574	-34.9464	-52.8702	-39.9526	-54.5003	-129.41	-205.09	-238.406	-210.82
258.801	15	2.66103	-20.9373	42.7107	-19.2229	-12.6985	-3.8618	-0.084809	11.313	-13.0515	-8.42788	-25.6543	-24.3421	-25.9143	-19.0288	-16.018	-27.3642	-25.0727	-29.3129	-22.8069	-39.6815	-40.8451	-27.9566	-33.3952	-27.5686	-38.6267	-48.7187	-45.3895	-24.4237	-36.9819	-44.9218	-47.7314	-39.8646	-42.2396	-42.6627	-56.9519	-44.0996	-61.1911	-148.042	-220.773	-250.469	-205.906
277.287	16	2.0629	-24.887	40.659	-21.5254	-21.7664	-5.01111	-1.31929	9.68301	-13.7892	-9.28018	-27.5193	-25.4685	-27.064	-20.8396	-18.9124	-28.2805	-26.7206	-30.7752	-24.0849	-42.7036	-43.2727	-31.3453	-36.1591	-31.1186	-43.43	-52.0532	-46.9766	-27.4113	-40.6368	-47.8787	-53.5729	-46.513	-45.5746	-50.8624	-61.7472	-50.7782	-69.5995	-165.57	-231.924	-255.915	-200.266
295.773	17	2.2312	-26.6658	38.4254	-25.49	-30.8722	-4.58092	-0.825569	8.96482	-13.8373	-9.50209	-28.4813	-26.3169	-28.0273	-22.769	-22.3002	-29.4824	-27.7021	-31.6279	-25.8978	-46.5696	-46.6979	-34.4286	-39.0423	-33.8467	-46.4537	-54.7464	-49.4213	-29.9574	-43.3343	-51.0422	-57.5283	-55.7895	-50.0887	-58.876	-67.1593	-59.6488	-80.306	-184.221	-239.011	-253.477	-198.707
314.258	18	1.81179	-25.2581	35.4296	-30.1092	-38.9655	-4.92607	-0.481384	10.3591	-14.8706	-9.71373	-29.6292	-27.1363	-29.3489	-24.1943	-25.0317	-30.9123	-28.6627	-32.1273	-28.1415	-50.4331	-50.5345	-37.6833	-41.3055	-36.8442	-50.0298	-57.3279	-52.8392	-33.4547	-46.7674	-54.665	-60.8234	-66.2038	-58.8433	-67.8514	-76.3414	-70.9325	-92.8267	-199.342	-239.846	-248.721	-196.778
332.743	19	1.50986	-23.6323	35.8236	-35.9732	-45.7356	-7.04307	1.90348	10.6965	-16.1455	-9.92495	-31.0335	-27.7143	-30.4341	-25.9888	-27.3859	-32.6984	-31.2544	-33.7683	-30.5942	-53.9089	-53.8711	-39.4828	-43.683	-38.8113	-51.9486	-60.7175	-55.7784	-37.3752	-50.6374	-58.6987	-67.6942	-77.326	-69.4924	-79.9492	-87.4264	-82.2074	-106.576	-210.317	-239.415	-241.461	-197.338
351.229	20	-0.469527	-22.4838	37.3933	-41.5311	-52.3784	-8.97035	3.26203	12.479	-17.7554	-10.6641	-31.286	-28.9603	-32.1188	-27.3992	-29.7244	-34.5068	-33.164	-36.372	-32.711	-57.2691	-56.8175	-40.7206	-44.1406	-40.5796	-53.7793	-64.3964	-59.4666	-42.3699	-55.3882	-64.2916	-74.4931	-88.6049	-81.1728	-92.7177	-99.5285	-95.8961	-122.495	-217.035	-235.023	-237.967	-196.679
369.716	21	-6.67821	-22.1379	40.189	-46.4536	-59.1722	-10.2508	3.98449	15.9268	-18.7175	-11.6268	-30.5534	-30.2405	-33.5782	-28.2167	-31.3884	-35.8286	-35.2023	-39.0261	-35.0243	-59.0595	-59.1004	-41.1719	-45.5168	-41.7431	-54.8304	-68.7627	-64.5424	-49.4779	-61.3314	-72.5981	-85.0389	-101.86	-95.3912	-106.599	-114.57	-111.261	-139.304	-222.149	-231.055	-238.724	-196.336
388.201	22	-13.38	-21.1589	42.2455	-52.4957	-64.68	-13.4819	1.22661	20.2019	-19.717	-12.4927	-29.9666	-31.7262	-35.5591	-29.0118	-32.4256	-37.0989	-37.3412	-41.6844	-37.7071	-60.3139	-59.5812	-42.7071	-46.3306	-45.0687	-57.8481	-74.7579	-69.5703	-58.1388	-69.86	-82.7139	-98.0862	-113.422	-111.18	-120.93	-130.042	-127.165	-155.374	-222.253	-228.984	-239.391	-194.292
406.687	23	-18.0585	-23.14	45.7733	-56.3191	-69.3634	-17.1925	-2.72289	24.2117	-21.6547	-13.6313	-28.6489	-33.5733	-36.9525	-29.8746	-34.0305	-38.2813	-39.6264	-44.1856	-40.3865	-62.5312	-59.6506	-43.6343	-47.2923	-49.675	-61.415	-81.9944	-75.8168	-68.2593	-79.9436	-94.3836	-113.163	-124.897	-127.926	-135.984	-144.433	-140.516	-169.856	-219.864	-229.415	-240.037	-192.714
425.173	24	-19.7289	-26.4863	42.0471	-59.8071	-74.6414	-22.5393	-10.081	28.2997	-22.9643	-14.0739	-28.3211	-35.0392	-38.5843	-31.2732	-35.5134	-40.069	-41.3039	-46.0915	-43.1498	-65.3233	-59.871	-45.3787	-47.9808	-55.4465	-67.5444	-89.9528	-82.7373	-78.9148	-91.2333	-107.61	-126.159	-137.775	-144.251	-151.845	-158.28	-157.539	-183.052	-217.136	-229.413	-240.731	-190.817
443.659	25	-20.9442	-30.8109	38.1501	-58.1239	-79.2739	-28.6477	-18.5077	30.3502	-23.6393	-14.1781	-29.3826	-36.5387	-40.2338	-33.1247	-37.0153	-41.4562	-44.5434	-47.0241	-45.733	-65.6785	-60.8707	-46.9241	-49.6457	-62.5735	-74.0481	-99.2378	-92.3894	-90.7564	-104.091	-121.751	-138.707	-152.222	-159.577	-167.454	-172.454	-168.216	-194.345	-214.544	-229.803	-240.337	-190.357
462.145	26	-19.8152	-33.648	39.0802	-58.8989	-82.3302	-36.5098	-24.7685	33.2327	-23.9853	-13.9788	-29.2828	-36.8514	-41.8364	-35.2515	-38.7274	-43.5575	-48.0034	-47.7503	-48.0092	-66.7992	-63.0656	-49.574	-53.0307	-71.1741	-81.6933	-108.876	-103	-102.678	-117.856	-136.608	-149.879	-164.467	-172.435	-182.133	-184.196	-179.262	-202.473	-211.757	-230.045	-236.693	-189.061
480.631	27	-19.1542	-36.4425	39.4023	-55.6668	-84.3345	-42.2542	-27.6399	35.3629	-27.1678	-14.3885	-29.8514	-37.5778	-42.9495	-37.5472	-40.5909	-45.4842	-51.4958	-49.0854	-49.5095	-67.6481	-65.9723	-51.2205	-58.7862	-79.0012	-90.2797	-119.031	-115.461	-114.334	-131.053	-151.605	-162.066	-176.522	-183.247	-195.347	-194.327	-187.999	-208.643	-210.757	-231.08	-234.649	-188.924
499.117	28	-18.4786	-37.4308	36.2487	-55.1877	-86.585	-46.3835	-25.9377	37.0656	-29.536	-14.4646	-31.4136	-38.2802	-44.4515	-41.0503	-42.4356	-47.0845	-54.7818	-51.0541	-50.7833	-67.8836	-69.8534	-54.6477	-65.4838	-87.1211	-99.6637	-130.293	-131.126	-125.676	-144.389	-166.497	-173.277	-189.441	-188.327	-206.436	-202.407	-195.792	-211.654	-210.686	-231.235	-233.171	-189.408
517.602	29	-18.6679	-37.7542	37.4476	-56.6659	-87.7316	-48.5964	-26.1061	38.438	-32.6987	-15.025	-34.036	-39.4763	-46.0189	-43.5722	-44.9651	-48.0527	-58.4323	-52.9377	-52.2538	-68.5273	-74.2033	-61.1956	-75.3055	-96.2979	-111.807	-141.548	-150.261	-139.09	-157.655	-180.521	-183.976	-201.754	-192.556	-212.463	-209.062	-199.455	-212.724	-211.622	-234.213	-232.668	-190.239
536.088	30	-17.7201	-38.4476	36.3092	-62.0422	-89.6899	-53.6856	-24.3015	40.6959	-35.872	-16.2079	-36.0462	-40.2388	-47.2467	-44.6076	-47.2953	-49.569	-60.8119	-54.8242	-54.0539	-70.9943	-79.2867	-69.4751	-86.8067	-106.107	-124.813	-152.6	-166.137	-151.304	-171.367	-193.005	-193.579	-211.861	-196.166	-215.179	-213.846	-205.345	-212.418	-213.294	-237.815	-233.181	-189.64
554.573	31	-15.7003	-39.2741	28.6747	-66.1847	-90.9776	-58.6242	-19.2536	41.2694	-38.4568	-17.5066	-38.9967	-41.8008	-48.8944	-45.1087	-49.2219	-52.0043	-63.1573	-57.1612	-56.2613	-75.3992	-85.1032	-80.9574	-98.2923	-116.003	-139.515	-164.489	-181.475	-161.961	-183.82	-202.272	-201.11	-221.038	-199.039	-216.785	-217.057	-207.176	-211.269	-215.186	-241.603	-234.068	-187.065
573.059	32	-12.6004	-40.0698	20.8162	-72.3173	-93.8797	-66.0459	-15.487	42.0245	-38.8618	-18.3998	-40.1727	-43.7516	-50.7984	-46.0539	-51.692	-54.338	-65.6726	-59.9072	-59.2371	-81.0244	-92.8978	-94.3561	-110.241	-127.123	-153.939	-176.085	-195.992	-172.476	-194.544	-209.07	-205.742	-228.627	-200.768	-217.88	-218.343	-208.051	-208.346	-216.218	-243.265	-236.699	-182.627
591.544	33	-10.9443	-40.2518	17.3857	-76.4516	-98.6247	-73.2343	-15.1274	40.4195	-38.3248	-18.6512	-41.5441	-45.5509	-52.7903	-47.2996	-54.1071	-58.6679	-68.2071	-61.996	-62.3833	-87.8244	-100.959	-108.045	-124.328	-138.155	-167.017	-186.294	-206.9	-181.271	-204.175	-213.984	-209.482	-232.299	-203.31	-218.285	-218.308	-208.591	-205.182	-217.778	-248.224	-239.1	-177.98
610.031	34	-11.1259	-38.4397	15.6473	-77.8637	-103.063	-79.5593	-7.84248	40.7677	-36.78	-19.3229	-42.0941	-47.1952	-53.9625	-48.9215	-55.8499	-62.8842	-70.2848	-63.9381	-65.883	-95.7254	-110.255	-120.58	-137.14	-149.051	-179.056	-197.526	-214.384	-186.089	-210.992	-216.539	-211.342	-233.961	-204.543	-219.273	-216.518	-208.206	-201.974	-219.336	-251.226	-241.822	-169.319
628.517	35	-11.7484	-34.364	18.5937	-78.1125	-105.382	-81.5597	-3.15672	41.7833	-35.7585	-18.9185	-43.0811	-48.404	-55.2464	-51.749	-57.7066	-65.6494	-72.0742	-65.3235	-69.9691	-106.281	-119.729	-132.383	-150.56	-159.932	-190.815	-207.937	-221.703	-191.331	-215.678	-218.593	-213.455	-234.135	-203.86	-220.499	-213.154	-207.879	-198.668	-220.371	-255.213	-243.832	-162.086
647.002	36	-14.0495	-29.6258	22.9285	-74.2513	-107.92	-83.2471	-2.44067	43.5084	-34.3014	-18.3816	-43.9	-50.2952	-56.9643	-54.5591	-60.3183	-67.3052	-74.09	-67.6037	-74.8582	-119.038	-130.378	-142.945	-163.072	-169.81	-200.565	-215.271	-227.722	-194.636	-219.183	-219.594	-214.927	-234.587	-201.558	-220.078	-210.372	-206.657	-195.151	-221.152	-257.861	-247.625	-154.413
665.489	37	-17.5083	-24.9544	25.313	-69.5966	-106.17	-85.151	-2.82726	45.5503	-33.1542	-18.2274	-47.0753	-51.1894	-58.5205	-56.5141	-62.3403	-69.5123	-76.9229	-69.1669	-80.8308	-131.903	-138.501	-153.949	-174.558	-178.721	-208.731	-221.202	-232.63	-196.742	-219.355	-219.963	-216.882	-235.593	-199.502	-220.111	-208.224	-205.2	-193.057	-222.355	-261.394	-248.372	-147.276
683.975	38	-20.795	-22.833	21.4476	-66.6523	-102.794	-87.879	-3.57611	48.4365	-31.6072	-18.7563	-50.06	-52.2437	-59.8733	-57.6113	-64.4367	-70.4127	-79.9851	-73.0917	-87.6731	-142.955	-147.611	-166.182	-185.35	-188.037	-216.575	-225.528	-236.191	-198.276	-217.075	-219.269	-217.86	-238.033	-197.084	-220.067	-206.155	-202.48	-192.408	-223.137	-259.535	-247.047	-137.019
702.46	39	-24.2821	-22.0201	18.3825	-67.2267	-100.73	-91.049	-7.02857	52.2678	-30.5218	-19.3514	-53.7631	-53.0431	-61.9267	-58.3745	-67.7527	-71.1574	-83.2282	-77.7836	-95.9055	-152.442	-156.179	-176.601	-196.611	-196.732	-221.838	-226.686	-237.998	-200.612	-214.534	-219.471	-219.098	-240.171	-195.373	-219.674	-204.439	-200.267	-191.58	-223.92	-259.312	-238.138	-134.796
720.945	40	-27.0579	-22.7485	11.4791	-66.9398	-99.4356	-92.2978	-9.48466	55.9109	-29.2977	-20.2195	-56.1835	-54.7273	-63.9283	-59.352	-71.3485	-72.3851	-86.441	-85.0012	-104.581	-160.442	-164.513	-188.283	-206.047	-204.012	-224.164	-226.759	-239.839	-201.689	-211.253	-219.394	-219.107	-242.18	-195.245	-219.285	-203.205	-197.785	-190.115	-224.819	-259.349	-233.148	-133.378
739.431	41	-29.6672	-27.1836	10.8714	-69.8732	-99.2826	-94.1557	-11.378	59.9839	-29.1906	-20.5754	-59.16	-56.2473	-65.7278	-61.2886	-73.87	-73.8779	-89.0599	-92.3844	-112.99	-166.841	-174.021	-198.788	-214.23	-210.397	-227.884	-226.566	-241.25	-203.195	-207.39	-219.366	-218.911	-244.057	-195.801	-220.065	-200.26	-195.871	-188.837	-225.916	-260.57	-227.904	-131.249
757.916	42	-34.3977	-31.7931	10.8928	-74.8083	-102.112	-96.1781	-11.2317	64.54	-28.6614	-21.126	-61.065	-57.5655	-67.9988	-64.442	-77.1354	-75.7821	-91.3017	-102.151	-120.907	-173.207	-185.001	-207.265	-221.383	-216.195	-230.073	-226.224	-242.197	-203.446	-205.829	-219.519	-217.794	-244.905	-196.127	-219.237	-198.093	-194.58	-187.357	-225.919	-261.805	-224.016	-131.916
776.403	43	-39.5093	-35.4527	14.944	-79.1274	-102.02	-98.7573	-12.3136	69.8552	-29.3192	-21.2739	-62.3987	-58.7303	-70.2155	-67.7175	-79.7762	-77.624	-93.8635	-110.922	-128.961	-181.149	-194.011	-214.025	-226.07	-220.134	-229.908	-226.496	-242.126	-200.945	-205.113	-221.151	-218.355	-245.72	-196.678	-218.769	-196.409	-194.569	-185.825	-226.408	-262.981	-222.066	-134.733
794.888	44	-43.7874	-40.0153	17.3732	-79.4502	-103.081	-101.947	-13.9926	71.8632	-29.7105	-21.4853	-62.6656	-60.7399	-72.3643	-70.5679	-82.2192	-80.1876	-97.7704	-120.613	-137.294	-190.069	-202.439	-221.263	-228.063	-222.667	-228.77	-225.44	-242.524	-198.005	-205.088	-222.15	-216.195	-246.047	-196.492	-219.013	-195.342	-194.205	-184.452	-226.704	-264.682	-225.64	-133.839
813.375	45	-46.6462	-43.5427	21.7156	-81.4896	-104.04	-104.502	-20.6409	77.1874	-28.4529	-21.6114	-64.9346	-62.7319	-74.6282	-72.5266	-83.1212	-82.6215	-102.005	-127.961	-145.756	-199.42	-212.315	-227.417	-229.927	-225.692	-229.406	-224.162	-240.784	-194.266	-204.234	-220.838	-216.385	-245.012	-196.283	-219.18	-195.953	-194.417	-183.276	-225.551	-264.882	-225.362	-135.015
831.861	46	-49.8308	-45.164	19.3995	-84.625	-103.824	-105.568	-28.3477	82.1117	-25.8999	-21.6769	-67.2341	-64.3524	-77.1782	-73.7348	-85.6002	-84.9487	-107.622	-136.907	-154.857	-207.816	-220.062	-233.596	-231.183	-228.1	-226.778	-223.27	-239.116	-190.436	-203.197	-219.816	-216.257	-244.055	-196.143	-219.224	-198.277	-195.067	-181.906	-224.646	-265.374	-225.671	-139.634
850.345	47	-54.2601	-47.5683	20.4937	-88.2636	-104.097	-104.945	-35.3206	81.321	-23.7601	-20.6704	-69.5403	-66.1572	-79.4697	-74.9706	-87.5874	-88.149	-114.515	-143.151	-164.267	-216.605	-228.997	-240.258	-232.509	-229.59	-223.456	-222.311	-236.623	-187.321	-203.396	-218.599	-216.442	-243.611	-196.703	-220.354	-199.891	-196.089	-180.911	-224.231	-266.057	-225.571	-141.171
868.832	48	-59.7118	-48.5927	23.6699	-91.6474	-107.788	-105.174	-41.377	80.7419	-22.1376	-20.3231	-72.3202	-68.2529	-81.5388	-75.7949	-90.6336	-93.0907	-121.616	-150.171	-173.368	-225.002	-237.632	-246.229	-233.572	-231.212	-222.41	-221.918	-235.072	-187.975	-204.008	-216.069	-214.866	-242.415	-196.999	-221.28	-203.389	-196.382	-180.481	-223.013	-267.386	-224.942	-139.79
887.318	49	-62.6934	-49.9019	20.2615	-94.9319	-108.4	-104.537	-45.9074	80.6703	-21.517	-19.5683	-74.9145	-68.7874	-84.3223	-77.7548	-93.2074	-97.891	-128.564	-156.384	-184.064	-233.454	-245.953	-250.854	-234.519	-232.777	-222.445	-221.407	-232.517	-188.359	-204.69	-214.674	-217.049	-241.074	-197.703	-222.651	-207.539	-199.041	-180.528	-221.859	-266.732	-225.941	-138.171
905.804	50	-68.2021	-50.7387	16.2198	-98.0473	-108.426	-108	-46.2182	76.1419	-22.8722	-19.6042	-76.2202	-68.9667	-87.1117	-79.9823	-96.6613	-105.212	-136.641	-165.38	-194.971	-241.496	-251.879	-253.772	-234.299	-233.167	-221.349	-220.97	-231.732	-189.505	-206.507	-215.66	-218.097	-242.02	-195.485	-222.7	-207.933	-201.825	-181.31	-221.635	-266.818	-226.299	-134.796
924.29	51	-72.9253	-52.6019	15.0419	-99.1484	-109.962	-109.254	-45.8347	71.0624	-23.9119	-20.7428	-76.6871	-69.221	-89.9061	-83.3715	-99.4202	-111.308	-144.757	-172.658	-205.908	-250.246	-255.613	-254.66	-236.095	-233.321	-220.282	-219.803	-231.368	-190.887	-209.302	-215.958	-219.333	-242.456	-192.835	-223.739	-208.625	-203.731	-182.829	-221.721	-265.1	-224.982	-131.284
942.775	52	-73.3699	-53.4748	12.6771	-98.9303	-111.861	-107.375	-48.0532	71.6439	-25.7773	-23.4422	-77.6691	-70.5528	-92.9211	-86.1738	-102.467	-117.318	-152.416	-181.767	-217.364	-258.475	-256.795	-253.106	-236.926	-233.102	-220.604	-218.723	-230.759	-193.023	-211.633	-216.008	-220.321	-241.808	-189.322	-223.556	-209.415	-201.864	-185.396	-221.224	-263.736	-226.347	-129.775
961.26	53	-71.1977	-53.5456	10.4734	-99.0481	-113.067	-106.682	-48.6947	72.0332	-27.1564	-26.3583	-78.6861	-72.0021	-96.2332	-89.6539	-104.88	-124.087	-160.806	-189.477	-229.879	-265.928	-259.237	-251.564	-236.139	-231.349	-219.739	-215.873	-229.703	-193.561	-211.808	-216.601	-221.364	-242.045	-186.034	-224.061	-207.23	-202.237	-187.438	-220.42	-263.43	-226.667	-128.901
979.747	54	-73.3304	-52.2362	13.3539	-100.807	-116.178	-108.61	-50.8807	72.07	-27.1195	-28.8514	-80.0061	-74.9349	-99.516	-92.5593	-107.697	-131.287	-169.244	-198.7	-239.302	-273.833	-260.455	-249.484	-234.729	-228.945	-218.353	-214.2	-230.089	-191.076	-213.054	-215.706	-221.798	-241.215	-182.749	-222.336	-206.498	-201.116	-188.887	-219.617	-265.387	-229.194	-127.956
998.233	55	-72.4079	-50.3234	17.4252	-102.244	-119.441	-109.387	-51.7987	71.891	-26.9385	-30.9437	-81.5201	-78.7171	-102.995	-96.0008	-110.859	-137.913	-176.983	-207.675	-247.929	-278.388	-263.015	-247.982	-232.533	-225.681	-217.416	-211.955	-231.951	-187.74	-214.001	-216.477	-220.895	-240.499	-180.586	-222.28	-208.64	-199.675	-189.81	-219.814	-266.234	-229.777	-123.975
1016.72	56	-71.7033	-48.0536	16.9678	-103.35	-120.931	-112.43	-52.6368	71.4723	-26.6533	-32.5371	-83.9592	-81.9155	-105.325	-98.2845	-114.565	-146.505	-184.404	-217.112	-256.522	-281.922	-266.969	-246.616	-226.559	-222.237	-217.307	-210.791	-233.001	-183.798	-213.34	-216.774	-220.496	-239.952	-178.829	-221.152	-209.704	-196.931	-190.09	-218.644	-268.542	-230.582	-118.714
1035.2	57	-70.9984	-47.4337	11.949	-105.359	-121.107	-117.623	-53.2545	70.1807	-25.7942	-32.202	-86.7071	-84.5325	-107.848	-101.482	-119.032	-154.457	-191.522	-227.017	-264.078	-283.932	-270.997	-246.274	-220.91	-218.086	-216.658	-210.358	-231.642	-179.245	-211.529	-217.027	-219.902	-240.708	-177.735	-222.022	-212.451	-198.058	-188.454	-217.825	-270.966	-228.44	-113.403
1053.69	58	-71.1428	-49.2976	5.92979	-107.093	-120.833	-122.076	-54.5907	67.9747	-23.971	-31.0348	-89.0089	-87.1146	-110.087	-104.531	-124.608	-161.581	-199.044	-236.659	-270.484	-286.498	-271.731	-245.717	-216.13	-215.629	-216.212	-211.148	-232.468	-177.678	-211.976	-218.016	-219.47	-239.25	-176.961	-222.048	-216.659	-198.022	-187.05	-217.685	-274.369	-229.875	-109.541
1072.18	59	-68.2955	-51.8379	0.362652	-108.039	-119.604	-124.103	-54.6273	65.6556	-23.2406	-29.6948	-91.4188	-89.1753	-111.042	-107.761	-130.477	-169.748	-206.96	-244.917	-276.48	-286.536	-272.007	-244.942	-213.106	-213.849	-215.282	-211.726	-232.74	-178.759	-213.69	-220.369	-219.342	-240.856	-176.147	-224.022	-219.444	-197.944	-186.944	-217.436	-276.765	-229.996	-106.881
1090.66	60	-67.7692	-55.3747	-6.65709	-109.019	-119.085	-126.139	-53.8558	63.8748	-23.0781	-28.492	-92.9259	-90.3246	-111.9	-110.836	-136.799	-178.142	-215.732	-252.233	-281.341	-287.872	-271.699	-242.711	-210.032	-212.709	-214.706	-212.573	-231.676	-179.923	-214.91	-221.064	-220.708	-242.793	-176.021	-226.833	-220.89	-198.978	-187.346	-216.716	-278.56	-232.803	-105.309
1109.15	61	-65.2107	-59.0264	-8.92709	-110.026	-118.378	-126.513	-54.1043	62.0662	-24.5023	-26.2538	-95.5335	-92.2317	-113.388	-114.666	-143.116	-188.427	-225.213	-258.658	-284.864	-288.912	-270.912	-240.543	-208.369	-211.345	-214.012	-213.558	-230.611	-181.551	-215.489	-223.04	-222.531	-245.843	-177.683	-230.096	-225.209	-200.527	-188.286	-216.676	-277.415	-236.512	-105.443
1127.63	62	-62.6863	-59.9623	-1.68821	-110.209	-118.2	-127.553	-54.7456	61.3043	-24.8103	-24.8176	-97.696	-93.7583	-115.691	-118.284	-149.381	-198.78	-234.955	-263.712	-287.299	-290.346	-268.864	-237.118	-206.012	-210.574	-214.167	-212.631	-232.799	-183.77	-217.212	-225.576	-225.432	-248.762	-178.959	-232.701	-228.314	-203.595	-190.085	-216.919	-275.668	-239.962	-103.768
1146.12	63	-59.9009	-62.2506	8.3061	-108.469	-118.369	-126.903	-55.5598	60.6482	-25.0708	-23.9442	-99.5057	-94.383	-118.659	-121.945	-155.385	-209.568	-243.442	-270.131	-287.913	-290.583	-267.314	-233.142	-204.291	-208.977	-215.237	-211.253	-232.673	-184.344	-218.449	-227.816	-228.035	-252.991	-180.357	-235.301	-230.702	-203.711	-192.425	-217.186	-272.553	-241.147	-102.774
1164.6	64	-58.6858	-62.5335	18.8259	-107.449	-120.775	-125.986	-56.1566	59.8769	-23.8556	-23.6012	-102.306	-96.4166	-122.32	-125.847	-161.89	-220.675	-251.827	-276.948	-288.595	-290.87	-266.351	-229.148	-202.052	-206.936	-216.796	-210.361	-233.268	-187.399	-216.703	-229.091	-229.459	-255.086	-180.898	-236.861	-232.42	-201.248	-193.722	-217.561	-269.127	-243.928	-99.8581
1183.09	65	-57.5564	-63.4767	30.1869	-106.43	-121.773	-124.743	-57.2138	60.3757	-20.87	-23.8409	-104.76	-99.0553	-126.826	-130.891	-169.115	-231.214	-259.751	-283.291	-292.295	-291.59	-263.232	-226.304	-200.232	-205.812	-218.982	-210.619	-234.663	-190.595	-215.112	-228.672	-229.981	-256.381	-182.138	-236.631	-233.272	-197.79	-193.728	-217.5	-268.205	-245.855	-98.5986
1201.58	66	-55.9346	-59.8778	39.9716	-106.259	-123.814	-124.814	-56.5582	60.057	-18.8861	-25.267	-105.689	-101.396	-131.879	-136.434	-176.753	-240.441	-267.51	-288.93	-297.641	-292.681	-259.521	-223.955	-200.72	-205.756	-220.487	-211.064	-236.397	-194.627	-214.712	-227.269	-229.877	-255.76	-178.926	-235.588	-230.901	-199.668	-193.732	-218.658	-268.668	-246.079	-96.2736
1220.06	67	-53.8457	-58.8381	44.2607	-107.083	-125.399	-124.279	-55.1964	61.1948	-18.0858	-26.9484	-105.788	-104.08	-135.757	-142.674	-183.93	-250.935	-275.055	-294.606	-303.13	-294.573	-256.373	-222.593	-201.315	-206.199	-222.609	-211.81	-235.971	-197.665	-213.579	-225.677	-228.54	-254.982	-176.148	-234.108	-229.078	-199.379	-193.422	-219.581	-269.876	-248.292	-92.1347
1238.55	68	-54.2573	-55.0958	44.326	-108.288	-127.524	-123.753	-54.7394	60.2759	-18.2716	-27.5173	-106.933	-106.492	-139.735	-149.744	-191.749	-259.679	-283.341	-298.479	-309.415	-295.685	-254.344	-221.868	-202.258	-206.527	-223.67	-213.147	-238.091	-199.416	-211.957	-223.871	-226.936	-254.882	-170.412	-231.792	-227.187	-201.931	-192.849	-221.275	-270.086	-249.197	-87.2917
1257.03	69	-56.4409	-51.6503	41.3928	-108.05	-127.326	-122.852	-55.4369	59.4959	-19.2121	-29.2462	-108.76	-107.255	-145.107	-157.945	-200.542	-266.765	-289.582	-300.893	-314.921	-295.495	-252.707	-220.784	-203.057	-207.265	-224.418	-214.496	-239.697	-199.742	-210.389	-222.433	-227.264	-255.583	-166.541	-229.181	-225.527	-204.364	-192.584	-222.768	-271.508	-245.451	-87.7528
1275.52	70	-57.8926	-47.216	36.8595	-106.477	-128.099	-122.633	-55.971	57.2373	-21.6293	-29.2873	-113.816	-108.295	-147.24	-166.457	-209.234	-273.878	-295.163	-302.813	-318.963	-295.102	-253.794	-219.791	-204.127	-207.291	-222.982	-214.971	-240.951	-200.051	-209.598	-222.521	-227.574	-258.786	-161.662	-227.645	-224.362	-205.462	-193.59	-224.222	-271.242	-243.76	-86.5038
1294.01	71	-64.3772	-46.5033	33.9487	-107.013	-128.815	-121.767	-56.0853	56.7982	-22.3978	-29.1842	-119.385	-110.722	-148.377	-175.018	-218.487	-281.097	-300.772	-304.213	-322.24	-293.498	-254.49	-218.188	-204.264	-206.827	-223.076	-215.388	-241.822	-198.685	-208.863	-223.548	-227.599	-258.953	-158.589	-226.921	-223.438	-201.798	-195.421	-224.722	-272.734	-241.688	-86.7775
1312.49	72	-70.8709	-48.1301	30.0695	-106.161	-129.876	-122.095	-55.7445	53.6338	-22.8521	-29.3453	-123.652	-114.33	-152.168	-183.405	-227.799	-287.029	-306.714	-305.865	-325.388	-289.054	-255.086	-216.445	-204.413	-207.161	-222.594	-214.834	-243.916	-198.354	-208.729	-224.127	-227.201	-262.863	-154.606	-226.281	-222.451	-198.16	-197.199	-225.571	-273.176	-240.938	-90.5808
1330.98	73	-75.5516	-51.2223	28.0979	-105.261	-130.647	-122.553	-54.4662	51.0671	-22.8407	-30.1732	-129.377	-119.45	-157.018	-191.943	-236.648	-293.63	-310.929	-306.317	-327.545	-284.705	-256.41	-215.611	-204.975	-207.983	-223.114	-214.284	-245.35	-198.091	-208.993	-223.944	-227.617	-262.449	-152.216	-225.707	-222.278	-192.442	-197.62	-226.541	-275.123	-238.028	-95.3406
1349.46	74	-77.8561	-56.1185	27.4705	-104.976	-130.77	-123.4	-53.0533	49.1648	-23.866	-30.4723	-133.015	-124.792	-163.692	-200.517	-244.97	-299.431	-315.727	-306.965	-328.22	-280.755	-256.953	-215.817	-204.888	-208.142	-223.912	-214.349	-247.878	-197.137	-210.399	-224.078	-226.611	-266.68	-149.195	-225.707	-223.763	-188.827	-196.838	-227.985	-276.942	-236.298	-95.2961
1367.95	75	-81.4672	-60.9396	28.3516	-106.913	-131.304	-124.334	-52.1735	48.723	-24.065	-33.2928	-136.271	-130.467	-172.221	-208.471	-253.004	-305.606	-319.788	-306.547	-326.769	-276.332	-257.449	-216.952	-204.702	-208.272	-225.071	-215.142	-250.414	-195.758	-211.543	-222.846	-226.004	-262.888	-147.932	-225.704	-225.111	-186.516	-197.253	-229.982	-280.758	-230.892	-97.7961
1386.43	76	-81.0343	-65.4273	26.6551	-107.225	-130.861	-127.723	-53.3264	47.9998	-24.4716	-36.6934	-140.037	-134.608	-181.684	-216.799	-260.952	-311.03	-324.228	-309.274	-324.545	-271.393	-258.027	-218.236	-204.593	-210.062	-225.553	-215.265	-253.724	-195.036	-214.35	-221.739	-225.864	-263.436	-147.896	-225.585	-226.183	-184.498	-195.313	-232.069	-283.598	-230.039	-99.727
1404.92	77	-77.1795	-69.2737	26.6562	-108.486	-130.612	-130.54	-54.7799	47.315	-24.7731	-39.5067	-146.169	-138.016	-189.275	-225.723	-268.35	-316.096	-327.548	-310.094	-321.948	-268.145	-259.199	-220.256	-204.608	-211.663	-226.106	-217.439	-255.821	-193.118	-216.638	-221.406	-227.288	-259.712	-147.54	-224.969	-225.746	-183.996	-193.552	-233.999	-287.464	-230.747	-101.027
1423.41	78	-71.8608	-72.7014	28.1902	-111.32	-130.481	-132.005	-55.4356	47.423	-25.8769	-41.8908	-151.209	-141.553	-196.715	-234.214	-276.841	-320.153	-331.263	-313.534	-320.02	-265.962	-258.151	-221.232	-203.93	-213.819	-226.657	-219.27	-256.92	-190.066	-218.929	-222.014	-227.607	-260.208	-148.198	-224.938	-225.608	-188.231	-191.921	-234.878	-291.78	-237.76	-100.921
1441.89	79	-68.3675	-74.6912	29.5499	-113.045	-132.068	-133.364	-55.9894	45.7155	-26.0251	-43.334	-156.405	-146.427	-201.782	-241.763	-285.036	-324.624	-334.503	-316.839	-318.076	-265.331	-259.14	-221.866	-204.313	-216.527	-227.942	-220.082	-257.423	-185.93	-219.171	-223.442	-228.289	-255.702	-148.956	-225.722	-224.821	-192.267	-191.329	-234.557	-294.362	-245.147	-100.317
1460.38	80	-66.4625	-74.6186	29.4167	-113.569	-133.023	-133.594	-56.5373	44.0348	-26.9964	-43.0473	-160.241	-151.906	-207.476	-248.734	-292.404	-328.315	-337.596	-320.367	-315.941	-265.251	-257.985	-221.583	-205.284	-219.582	-230.002	-221.456	-258.393	-183.514	-217.855	-225.303	-228.388	-257.18	-149.992	-226.276	-226.155	-194.702	-189.75	-234.366	-294.274	-255.001	-97.7108
1478.86	81	-66.7629	-73.4961	28.6083	-113.716	-134.692	-132.961	-56.5136	43.6515	-27.3772	-42.8559	-163.001	-158.464	-214.379	-254.842	-298.523	-330.863	-338.363	-318.232	-312.911	-266.28	-255.808	-222.225	-205.599	-221.384	-232.068	-222.523	-257.594	-183.019	-215.082	-227.427	-228.605	-258.218	-149.338	-226.645	-226.719	-196.728	-189.366	-234.279	-295.811	-259.054	-96.2745
1497.35	82	-68.6023	-68.7523	29.8923	-113.352	-134.608	-132.94	-56.0102	41.9422	-28.8183	-43.529	-165.383	-165.261	-221.319	-259.867	-304.931	-333.789	-338.425	-316.611	-310.445	-266.995	-254.156	-224.181	-206.493	-222.532	-234.14	-221.348	-256.845	-183.542	-214.053	-229.491	-227.674	-261.923	-149.9	-226.616	-228.997	-198.994	-188.598	-234.183	-297.172	-259.151	-94.321
1515.83	83	-72.2031	-61.4832	28.6569	-111.858	-134.352	-134.463	-55.854	39.9597	-29.6608	-45.4583	-166.111	-172.49	-227.77	-266.063	-310.244	-339.576	-338.521	-314.672	-308.379	-268.148	-255.706	-225.967	-207.662	-221.421	-236.204	-219.335	-255.649	-185.411	-213.91	-231.069	-227.71	-265.215	-150.071	-227.887	-230.054	-197.329	-189.522	-234.741	-295.487	-259.129	-93.7073
1534.32	84	-73.2109	-55.8554	31.994	-110.049	-133.197	-135.662	-54.2743	40.1337	-34.2148	-51.5303	-166.546	-179.769	-233.897	-273.468	-314.878	-346.438	-339.179	-313.016	-307.38	-268.526	-258.684	-227.928	-209.402	-220.512	-238.043	-217.019	-253.482	-188.903	-215.671	-230.947	-227.831	-267.584	-151.48	-229.116	-230.36	-193.811	-190.138	-235.248	-292.342	-261.967	-93.4188
1552.81	85	-73.5661	-53.9551	34.3105	-107.717	-132.074	-137.653	-52.7098	39.6646	-38.9388	-58.6657	-168.226	-186.624	-240.521	-281.723	-319.958	-353.838	-339.296	-311.542	-306.789	-270.371	-262.798	-228.67	-211.565	-219.082	-239.802	-214.257	-251.227	-189.973	-218.456	-231.417	-227.467	-270.351	-150.718	-229.845	-228.295	-193.336	-192.185	-236.653	-294.371	-260.072	-93.1008
1571.29	86	-71.3636	-53.7075	36.7504	-105.51	-130.376	-137.692	-51.9108	37.9754	-44.0324	-65.8658	-170.721	-194.05	-248.174	-291.274	-325.166	-361.631	-338.588	-312.067	-305.898	-272.794	-267.666	-228.825	-214.318	-219.732	-241.93	-211.727	-250.732	-189.571	-221.992	-231.243	-226.934	-272.785	-151.031	-230.244	-226.422	-195.339	-193.576	-236.375	-293.064	-260.927	-92.3731
1589.78	87	-72.9213	-55.3824	34.3633	-102.868	-130.329	-136.724	-52.199	38.2297	-48.1018	-72.6455	-173.198	-201.304	-255.83	-300.534	-330.565	-368.377	-337.712	-312.46	-305.197	-276.482	-272.163	-227.729	-216.398	-221.404	-243.492	-209.338	-253.321	-188.732	-223.393	-229.63	-226.104	-272.492	-149.757	-231.615	-223.169	-197.926	-195.581	-236.304	-293.143	-260.231	-91.3295
1608.26	88	-72.0218	-58.618	29.3717	-102.28	-130.304	-134.432	-53.1897	39.2591	-52.6247	-79.2579	-176.701	-208.435	-264.528	-308.11	-335.635	-374.096	-336.794	-313.327	-304.098	-279.252	-275.284	-227.995	-217.301	-225.326	-243.856	-208.068	-256.497	-189.232	-224.331	-228.971	-226.019	-270.411	-147.912	-232.867	-221.948	-200.391	-197.157	-235.981	-294.606	-255.501	-91.1772
1626.75	89	-73.3173	-59.5232	20.738	-103.348	-130.08	-132.98	-56.0694	38.5305	-53.2375	-83.1398	-180.936	-214.604	-273.929	-315.091	-339.724	-378.858	-336.373	-313.996	-303.83	-283.08	-276.722	-228.526	-217.654	-228.989	-241.532	-207.295	-259.901	-191.117	-225.505	-228.742	-226.603	-270.347	-143.814	-234.943	-221.285	-208.97	-199.782	-237.926	-298.454	-247.499	-92.4755
1645.24	90	-74.5702	-59.1396	14.5751	-105.287	-131.061	-131.592	-59.1513	37.9248	-54.8291	-86.4051	-185.595	-220.627	-283.59	-320.942	-343.815	-382.744	-335.805	-314.718	-304.458	-286.182	-278.142	-230.95	-216.354	-232.163	-238.437	-204.463	-261.732	-194.558	-227.807	-229.4	-228.175	-270.234	-140.6	-238.301	-222.436	-215.954	-201.483	-240.21	-296.487	-245.937	-94.2251
1663.72	91	-75.3713	-57.2189	13.7577	-107.566	-132.456	-131.767	-61.5233	37.5126	-56.8639	-89.3386	-190.61	-226.492	-290.56	-325.455	-346.514	-387.313	-337.674	-316.458	-306.054	-287.97	-280.69	-234.063	-214.18	-233.161	-235.351	-203.015	-260.982	-197.914	-230.079	-230.147	-230.412	-270.083	-137.342	-240.921	-225.266	-222.739	-203.61	-244.274	-297.057	-245.792	-93.7389
1682.21	92	-76.3375	-55.6908	12.1253	-110.677	-135.304	-133.264	-62.6847	37.4119	-61.0262	-92.0305	-195.641	-232.747	-296.368	-329.665	-348.672	-393.705	-340.142	-318.368	-307.611	-289.245	-282.815	-236.671	-212.949	-232.733	-232.474	-203.316	-259.049	-201.545	-232.922	-232.668	-233.431	-268.896	-136.987	-244.144	-229.131	-228.748	-205.794	-247.893	-295.189	-247.324	-95.0246
1700.69	93	-80.134	-56.5251	14.8365	-112.533	-138.185	-135.356	-63.424	37.3724	-65.4361	-95.3982	-200.64	-240.363	-300.65	-332.993	-350.851	-398.174	-340.291	-319.386	-310.398	-288.944	-286.124	-237.344	-211.587	-231.155	-229.817	-203.321	-257.219	-203.637	-235.318	-235.806	-235.529	-269.96	-137.02	-246.327	-230.697	-236.041	-206.704	-251.151	-292.729	-251.664	-95.8745
1719.18	94	-82.2302	-59.5841	16.674	-112.96	-141.787	-137.342	-63.1616	38.5024	-70.5175	-100.005	-206.32	-250.11	-304.26	-336.087	-353.832	-403.559	-339.742	-319.113	-312.937	-287.98	-288.059	-236.233	-210.01	-231.097	-229.135	-203.141	-255.939	-204.379	-238.153	-238.086	-237.199	-270.557	-138.406	-247.635	-231.48	-237.899	-207.541	-253.201	-291.174	-256.192	-96.8897
1737.66	95	-80.867	-62.1732	19.4104	-112.179	-144.233	-138.861	-63.0905	36.4781	-73.9744	-104.229	-212.678	-260.351	-307.919	-338.131	-356.056	-408.332	-339.721	-319.451	-315.555	-286.182	-289.43	-234.167	-208.626	-231.437	-229.619	-204.511	-255.272	-205.432	-240.396	-239.4	-238.976	-271.371	-140.62	-249.073	-232.478	-239.885	-208.567	-252.828	-291.216	-261.477	-98.1568
1756.15	96	-80.3322	-65.8443	15.2844	-113.108	-146.99	-139.558	-62.6989	31.6362	-77.2567	-108.433	-218.875	-269.188	-313.366	-339.486	-357.56	-407.921	-338.053	-319.993	-317.787	-285.077	-288.756	-231.872	-207.648	-230.329	-229.41	-204.774	-258.803	-205.658	-243.554	-237.251	-239.377	-271.474	-141.935	-252.758	-232.349	-236.372	-210.649	-250.774	-290.797	-264.747	-100.656
1774.63	97	-78.937	-67.9649	16.7309	-112.938	-146.291	-140.137	-61.9526	26.9292	-77.9476	-114.778	-226.004	-278.219	-319.78	-340.774	-357.191	-403.522	-335.892	-321.087	-319.808	-286.739	-288.312	-231.393	-206.913	-230.313	-230.507	-204.463	-261.929	-205.02	-246.205	-236.7	-239.641	-274.631	-140.873	-256.701	-231.514	-231.903	-212.948	-248.966	-289.933	-268.949	-102.525
1793.12	98	-77.7054	-67.9908	18.2569	-113.512	-145.354	-141.309	-62.9333	25.1896	-74.3724	-115.865	-233.983	-285.725	-325.196	-341.771	-353.248	-399.028	-335.059	-321.77	-321.569	-290.236	-286.652	-231.662	-206.713	-232.637	-232.405	-203.154	-262.016	-204.373	-244.716	-233.779	-238.011	-276.743	-140.344	-258.664	-232.978	-228.3	-214.409	-248.096	-293.503	-271.582	-103.636
1811.61	99	-77.6798	-68.0277	21.9587	-115.169	-143.676	-143.021	-65.7178	24.6596	-71.2582	-115.675	-241.515	-291.766	-331.115	-341.298	-347.784	-393.411	-334.229	-323.989	-324.114	-293.804	-285.136	-233.81	-206.421	-233.733	-233.858	-202.775	-262.339	-203.797	-241.101	-232.797	-237.742	-277.789	-138.22	-256.988	-233.76	-225.506	-214.125	-246.606	-294.229	-275.29	-102.017
1830.09	100	-80.5653	-68.3685	25.7673	-118.773	-141.796	-144.428	-68.1836	25.4827	-67.2587	-115.74	-247.508	-297.042	-336.284	-341.405	-341.828	-388.443	-334.051	-326.937	-326.303	-296.554	-283.514	-235.485	-206.32	-235.377	-234.615	-202.338	-263.737	-202.518	-236.986	-233.677	-236.796	-276.777	-136.217	-253.65	-234.207	-222.949	-213.101	-246.023	-294.868	-276.044	-99.3397
1848.58	101	-81.7857	-67.232	31.2673	-120.292	-139.652	-144.882	-70.9132	28.8923	-63.8938	-116.448	-254.358	-303.544	-339.345	-340.397	-331.872	-388.203	-335.067	-329.565	-327.325	-298.032	-282.561	-235.882	-205.823	-237.958	-235.844	-201.797	-262.938	-202.355	-232.562	-238.307	-237.025	-276.238	-134.647	-247.981	-235.554	-225.331	-212.831	-246.594	-296.954	-277.438	-96.9537
1867.07	102	-81.8822	-66.1599	33.5166	-122.463	-138.592	-146.341	-74.7604	33.0161	-61.4975	-115.678	-260.973	-309.627	-341.123	-337.04	-322.72	-389.869	-336.186	-332.722	-327.762	-293.313	-282.126	-233.83	-204.678	-240.201	-235.493	-201.221	-261.505	-203.673	-228.723	-236.722	-236.926	-273.884	-132.713	-239.761	-236.436	-228.181	-213.103	-247.572	-300.45	-277.25	-93.9092
1885.55	103	-80.5424	-66.2485	34.1157	-122.476	-137.606	-148.893	-76.822	31.2118	-63.4477	-119.056	-267.566	-315.068	-344.629	-333.485	-315.631	-391.104	-336.268	-334.929	-327.496	-288.68	-281.809	-232.621	-204.961	-239.518	-235.414	-201.564	-262.155	-205.914	-229.519	-235.969	-239.738	-272.788	-130.715	-234.214	-236.475	-230.511	-216.273	-248.486	-301.496	-279.208	-91.6688
1904.04	104	-78.5112	-63.8634	35.1078	-123.344	-136.784	-151.094	-78.6047	27.9016	-65.6313	-121.947	-272.525	-319.848	-347.427	-329.595	-307.332	-391.923	-335.236	-335.45	-326.428	-284.91	-279.464	-231.174	-205.012	-239.303	-235.803	-201.314	-262.266	-208.267	-229.894	-233.096	-239.38	-272.018	-129.435	-233.054	-236.565	-233.278	-220.939	-250.643	-305.974	-281.913	-91.269
1922.52	105	-77.6476	-62.7593	34.0627	-120.787	-136.06	-154.756	-79.0993	25.5961	-69.0469	-126.614	-277.233	-324.995	-348.335	-325.143	-298.557	-391.726	-333.394	-335.904	-325.049	-282.71	-276.836	-231.17	-204.937	-239.443	-237.055	-200.431	-262.949	-209.507	-229.399	-228.573	-238.8	-273.472	-127.17	-235.511	-236.669	-235.748	-222.445	-253.161	-309.781	-284.763	-91.5243
1941.01	106	-78.8542	-62.5205	33.3526	-119.367	-135.387	-158.649	-79.0674	22.4037	-73.4264	-131.298	-280.523	-329.254	-349.37	-320.092	-294.256	-390.322	-330.127	-335.757	-324.749	-281.691	-276.34	-230.776	-206.425	-240.297	-237.65	-200.284	-265.626	-210.344	-227.926	-224.119	-237.877	-275.8	-125.755	-237.501	-235.519	-236.772	-223.589	-253.204	-309.146	-290	-92.0528
1959.49	107	-79.311	-62.8981	30.8211	-118.465	-137.126	-160.599	-79.9579	18.3604	-77.3655	-136.433	-284.03	-333.13	-350.28	-316.367	-289.478	-387.93	-327.456	-335.733	-324.694	-285.128	-276.256	-231.418	-208.794	-242.679	-237.682	-201.067	-268.165	-210.277	-227.033	-224.194	-237.66	-278.736	-124.137	-242.072	-235.345	-237.041	-224.216	-253.023	-308.738	-296.039	-92.2993
1977.98	108	-79.0409	-62.9453	31.5819	-119.869	-139.544	-160.524	-82.4258	16.4259	-80.2687	-142.325	-287.476	-337.275	-348.897	-313.758	-285.454	-386.377	-326.325	-335.801	-324.821	-288.468	-276.831	-231.224	-210.618	-246.084	-237.54	-203.515	-269.89	-210.232	-225.797	-224.136	-237.373	-280.77	-121.15	-245.532	-235.317	-236.113	-222.65	-255.164	-308.966	-300.522	-91.3949
1996.46	109	-78.5714	-64.3861	29.6167	-120.003	-142.364	-160.289	-84.5601	13.7648	-83.5674	-148.887	-291.008	-340.703	-344.961	-311.902	-283.902	-384.443	-326.511	-337.009	-324.65	-291.996	-279.992	-231.583	-212.812	-246.968	-238.101	-204.655	-270.798	-209.369	-225.357	-224.643	-238.905	-282.422	-117.241	-246.542	-235.723	-234.832	-219.46	-257.229	-308.151	-305.838	-91.5139
2014.95	110	-74.8829	-64.2897	30.5288	-123.458	-146.546	-159.987	-88.7379	10.3843	-88.4925	-154.042	-295.583	-343.243	-341.135	-310.433	-284.451	-383.273	-326.108	-337.229	-324.686	-294.888	-283.819	-230.237	-214.911	-246.448	-236.968	-205.771	-269.629	-210.517	-226.745	-224.543	-240.956	-283.458	-113.149	-244.242	-235.633	-234.402	-219.159	-259.088	-308.985	-310.976	-95.2098
2033.44	111	-71.8756	-64.1145	29.0275	-125.628	-150.028	-162.736	-95.0162	6.71752	-93.0936	-159.509	-299.957	-344.601	-335.465	-310.063	-285.871	-383.022	-325.226	-338.551	-324.972	-297.401	-286.441	-230.625	-214.685	-244.863	-235.505	-205.835	-265.415	-211.04	-228.648	-223.374	-243.621	-284.033	-110.2	-244.506	-236.068	-233.787	-217.854	-262.764	-314.221	-310.779	-97.7137
2051.92	112	-71.5011	-63.7819	29.6619	-128.365	-153.009	-166.222	-100.818	3.30367	-98.465	-164.892	-303.301	-343.725	-329.064	-310.92	-288.722	-384.162	-324.268	-338.982	-325.103	-299.172	-289.678	-230.498	-213.656	-242.369	-235.187	-206.343	-262.48	-210.994	-230.353	-224.812	-245.238	-283.977	-108.261	-244.477	-237.079	-233.694	-216.608	-267.727	-317.739	-307.092	-99.9909
2070.41	113	-69.6607	-64.8246	27.2555	-129.302	-156.185	-171.255	-106.684	-0.549242	-105.189	-170.145	-305.529	-341.503	-322.627	-311.669	-291.107	-384.786	-323.565	-339.8	-324.328	-299.48	-292.767	-231.162	-213.779	-239.839	-234.128	-205.738	-261.007	-209.569	-231.769	-228.512	-245.181	-284.113	-106.827	-246.529	-237.122	-233.904	-216.548	-270.166	-320.38	-301.695	-102.532
2088.89	114	-68.6188	-64.3085	25.5197	-131.289	-159.675	-175.701	-111.691	-4.37693	-111.89	-174.648	-307.766	-339.01	-317.539	-313.185	-293.456	-386.354	-322.18	-340.758	-325.166	-299.139	-293.506	-231.07	-213.802	-239.633	-232.138	-206.615	-260.221	-208.117	-232.856	-233.118	-243.265	-284.465	-106.761	-249.94	-238.464	-235.485	-217.9	-271.647	-321.322	-294.496	-106.261
2107.38	115	-68.223	-64.1281	19.9895	-133.132	-162.592	-180.378	-118.514	-9.52152	-117.984	-179.577	-308.137	-334.737	-314.387	-315.523	-295.541	-387.267	-322.91	-341.828	-326.696	-299.895	-295.847	-232.187	-214.552	-239.576	-230.653	-207.643	-259.985	-204.918	-233.466	-238.632	-243.37	-285.354	-108.215	-253.453	-242.22	-237.512	-218.261	-274.436	-323.736	-288.058	-107.23
2125.87	116	-67.5022	-63.2935	18.5689	-135.158	-166.676	-182.867	-125.672	-16.9152	-125.031	-184.151	-305.91	-329.818	-313.801	-318.593	-298.11	-388.757	-325.149	-344.285	-328.122	-300.848	-298.341	-232.001	-217.865	-243.215	-229.794	-212.947	-261.208	-201.496	-234.442	-242.172	-242.526	-285.684	-112.212	-253.285	-247.531	-241.425	-217.943	-274.903	-325.638	-284.542	-111.044
2144.35	117	-65.4883	-62.9757	20.0743	-138.396	-171.417	-186.709	-135.82	-26.1801	-132.222	-188.588	-301.246	-323.888	-314.564	-320.785	-300.702	-389.566	-329.16	-346.589	-330.565	-302.217	-301.063	-231.772	-220.969	-245.715	-229.756	-217.165	-262.157	-198.191	-236.525	-239.006	-242.454	-286.461	-116.491	-256.408	-250.949	-245.432	-216.057	-277.045	-328.357	-283.948	-117.28
2162.84	118	-66.124	-62.7977	17.9011	-141.178	-176.401	-191.694	-145.653	-36.4395	-139.255	-193.147	-296.714	-316.316	-316.336	-321.394	-303.433	-389.969	-333.122	-347.703	-332.93	-304.73	-303.957	-229.955	-220.023	-246.92	-229.821	-218.101	-263.415	-194.845	-237.576	-231.957	-243.794	-288.833	-121.437	-259.082	-253.645	-249.67	-213.745	-277.406	-331.384	-281.843	-124.333
2181.32	119	-65.6803	-64.8974	17.1723	-143.435	-181.385	-197.815	-156.261	-46.7684	-146.31	-197.07	-291.655	-308.522	-318.017	-324.28	-304.075	-389.392	-334.78	-348.912	-334.574	-306.403	-309.146	-229.445	-218.763	-244.159	-228.77	-216.069	-264.239	-192.913	-243.217	-225.586	-249.126	-291.549	-126.769	-262.319	-253.68	-252.394	-212.276	-282.164	-334.688	-275.322	-127.591
2199.81	120	-66.3181	-67.557	22.2376	-145.173	-186.65	-203.794	-164.939	-54.7162	-152.888	-200.71	-285.794	-301.795	-319.39	-325.835	-303.582	-389.756	-334.809	-350.94	-335.814	-307.278	-310.173	-227.41	-217.612	-239.75	-226.479	-212.14	-264.012	-192.318	-247.999	-223.969	-252.304	-292.806	-129.798	-266.074	-249.693	-251.548	-211.831	-284.645	-335.106	-271.287	-127.933
2218.29	121	-66.5622	-70.6583	26.2139	-146.413	-191.379	-209.586	-173.283	-59.5144	-158.646	-203.459	-282.676	-295.664	-320.265	-327.353	-302.368	-389.457	-334.581	-351.857	-337.027	-307.453	-310.135	-224.625	-214.199	-232.972	-224.035	-203.862	-262.619	-192.179	-251.772	-226.276	-255.61	-294.173	-129.931	-272.602	-242.839	-248.831	-210.891	-291.704	-335.528	-270.834	-127.8
2236.78	122	-66.7577	-72.7805	24.8296	-145.498	-193.614	-212.764	-175.589	-62.5458	-161.467	-204.752	-282.115	-292.851	-320.28	-328.379	-301.401	-389.182	-332.965	-351.662	-337.099	-307.006	-309.997	-223.607	-211.543	-228.081	-221.914	-197.68	-262.08	-192.322	-253.478	-228.458	-258.324	-295.641	-129.825	-274.449	-239.65	-247.11	-211.444	-293.472	-336.001	-267.862	-126.261
2255.27	123	-66.511	-73.9482	29.651	-146.059	-195.639	-214.517	-177.804	-63.7475	-164.36	-205.564	-280.67	-291.736	-320.126	-331.971	-299.73	-389.201	-329.767	-353.128	-338.326	-306.625	-308.375	-223.397	-211.337	-221.682	-218.943	-191.994	-260.212	-193.886	-257.93	-234.925	-261.363	-295.537	-129.7	-275.821	-235.459	-244.084	-212.429	-298.918	-335.061	-267.024	-123.288

## Sheet: Ancylecha fenestrata female
Amplitude Data (m)		Frequency (kHz)
Position on CA (µm)	Index Point	2	2.5	3	3.5	4	4.5	5	5.5	6	6.5	7	7.5	8	8.5	9	9.5	10	10.5	11	11.5	12	12.5	13	13.5	14	14.5	15	15.5	16	16.5	17	17.5	18	18.5	19	19.5	20
0	1	1.14368e-09	2.59226e-09	6.90863e-10	1.14806e-09	1.10145e-09	1.3956e-09	6.59277e-10	1.38899e-09	1.99773e-09	1.53705e-09	1.18873e-09	1.97783e-09	2.20653e-09	2.87117e-09	2.68781e-09	2.78739e-09	1.88091e-09	2.76109e-09	4.63681e-09	3.54074e-09	4.55389e-09	3.8094e-09	1.6529e-09	1.0754e-09	8.2728e-10	3.29389e-09	1.43681e-09	4.76499e-09	7.45834e-10	2.20081e-09	1.04736e-09	1.21378e-09	8.49105e-10	7.04197e-10	8.49703e-10	6.65981e-10	4.52613e-10
20	2	1.17289e-09	2.60394e-09	6.91191e-10	1.23702e-09	1.13395e-09	1.40872e-09	6.58968e-10	1.43373e-09	2.03029e-09	1.5724e-09	1.25236e-09	2.04298e-09	2.33995e-09	3.04804e-09	2.70429e-09	2.88238e-09	1.90821e-09	2.86802e-09	4.76371e-09	3.72845e-09	4.59678e-09	4.016e-09	1.67502e-09	1.12675e-09	8.55765e-10	3.36858e-09	1.49202e-09	4.75841e-09	7.83859e-10	2.2131e-09	1.08443e-09	1.28244e-09	8.66441e-10	7.48832e-10	8.5014e-10	7.18381e-10	4.89726e-10
40	3	1.17401e-09	2.65602e-09	6.92465e-10	1.26676e-09	1.17571e-09	1.41368e-09	6.42463e-10	1.44985e-09	2.08882e-09	1.59048e-09	1.2788e-09	2.08832e-09	2.4124e-09	3.14475e-09	2.70335e-09	2.94228e-09	1.91487e-09	2.93642e-09	4.8856e-09	3.89306e-09	4.74982e-09	4.24901e-09	1.70632e-09	1.15579e-09	8.73908e-10	3.43584e-09	1.53792e-09	4.7661e-09	8.11992e-10	2.21721e-09	1.10759e-09	1.34212e-09	8.93406e-10	7.80751e-10	8.66265e-10	7.56942e-10	5.10678e-10
60	4	1.19807e-09	2.73929e-09	7.1448e-10	1.31553e-09	1.20995e-09	1.43653e-09	6.39262e-10	1.48991e-09	2.14036e-09	1.64415e-09	1.28872e-09	2.21139e-09	2.50178e-09	3.35417e-09	2.77461e-09	3.15648e-09	1.98245e-09	3.08639e-09	5.09147e-09	4.0644e-09	4.90708e-09	4.45033e-09	1.72604e-09	1.18584e-09	8.70019e-10	3.6358e-09	1.53451e-09	4.7911e-09	8.42579e-10	2.30159e-09	1.16521e-09	1.40971e-09	8.67964e-10	8.33579e-10	8.89766e-10	8.23512e-10	5.45929e-10
80	5	1.17803e-09	2.7189e-09	7.03476e-10	1.24869e-09	1.22979e-09	1.38421e-09	6.21297e-10	1.35218e-09	2.25538e-09	1.54496e-09	1.25948e-09	2.10727e-09	2.41672e-09	3.25353e-09	2.79612e-09	3.22236e-09	1.92493e-09	3.13984e-09	5.09559e-09	4.28688e-09	4.82967e-09	4.65387e-09	1.75705e-09	1.24399e-09	8.71251e-10	3.67366e-09	1.55246e-09	4.78155e-09	8.63238e-10	2.34118e-09	1.16912e-09	1.43828e-09	8.93941e-10	7.96287e-10	8.69829e-10	8.25224e-10	5.37536e-10
100	6	1.1867e-09	2.83207e-09	7.20116e-10	1.36736e-09	1.22641e-09	1.46988e-09	6.30092e-10	1.58265e-09	2.27979e-09	1.76331e-09	1.44196e-09	2.46715e-09	2.74967e-09	3.74535e-09	2.83052e-09	3.47315e-09	2.15733e-09	3.35198e-09	5.67805e-09	5.02318e-09	5.60024e-09	5.41599e-09	1.97555e-09	1.36848e-09	1.01326e-09	4.36929e-09	1.85977e-09	5.1284e-09	1.00674e-09	2.39058e-09	1.28487e-09	1.58641e-09	1.01763e-09	9.58364e-10	9.32842e-10	9.39565e-10	6.43933e-10
120	7	1.20373e-09	3.01839e-09	7.65476e-10	1.43815e-09	1.32009e-09	1.55607e-09	6.47994e-10	1.6891e-09	2.443e-09	1.86724e-09	1.49112e-09	2.65411e-09	2.89277e-09	4.11289e-09	2.98048e-09	3.89826e-09	2.34751e-09	3.66695e-09	6.31495e-09	5.48314e-09	6.05193e-09	5.96518e-09	2.15199e-09	1.4789e-09	1.06675e-09	4.79633e-09	1.99978e-09	5.47474e-09	1.09905e-09	2.70024e-09	1.47508e-09	1.76946e-09	1.09312e-09	1.12097e-09	1.04298e-09	1.09058e-09	7.86766e-10
140	8	1.19772e-09	3.11905e-09	7.96521e-10	1.48235e-09	1.35632e-09	1.58149e-09	6.73715e-10	1.74668e-09	2.59048e-09	1.95304e-09	1.56197e-09	2.82513e-09	3.02343e-09	4.39191e-09	3.14898e-09	4.25985e-09	2.53407e-09	3.95276e-09	6.84375e-09	5.99336e-09	6.37882e-09	6.45903e-09	2.33082e-09	1.58098e-09	1.12845e-09	5.35577e-09	2.16922e-09	5.95091e-09	1.22723e-09	2.98399e-09	1.65082e-09	1.94614e-09	1.20484e-09	1.28883e-09	1.12989e-09	1.21556e-09	9.28422e-10
160	9	1.16241e-09	2.99396e-09	7.72688e-10	1.40132e-09	1.34388e-09	1.50919e-09	6.55709e-10	1.61708e-09	2.74182e-09	1.94211e-09	1.53903e-09	2.80422e-09	2.97339e-09	4.36867e-09	3.30785e-09	4.40334e-09	2.62753e-09	4.10373e-09	6.99967e-09	6.42325e-09	6.56792e-09	6.88836e-09	2.53117e-09	1.71788e-09	1.23151e-09	5.76295e-09	2.39996e-09	6.43913e-09	1.32514e-09	3.15038e-09	1.85642e-09	2.07421e-09	1.39049e-09	1.32441e-09	1.22887e-09	1.30461e-09	1.00165e-09
180	10	1.15343e-09	3.18695e-09	8.26178e-10	1.56379e-09	1.38964e-09	1.59023e-09	7.12728e-10	1.8455e-09	2.80245e-09	2.05438e-09	1.73348e-09	3.06237e-09	3.29724e-09	4.76136e-09	3.5141e-09	4.82797e-09	2.89525e-09	4.50705e-09	7.704e-09	6.90002e-09	7.18287e-09	7.41841e-09	2.77193e-09	1.85847e-09	1.29375e-09	6.55843e-09	2.50375e-09	7.35766e-09	1.50374e-09	3.54974e-09	2.10401e-09	2.37139e-09	1.53128e-09	1.66054e-09	1.37415e-09	1.52017e-09	1.23785e-09
200	11	1.14498e-09	3.22705e-09	8.32917e-10	1.56006e-09	1.4931e-09	1.56839e-09	7.98091e-10	1.9152e-09	2.91416e-09	2.16025e-09	1.9329e-09	3.29724e-09	3.48106e-09	5.09665e-09	3.95819e-09	5.36605e-09	3.26288e-09	5.16444e-09	9.00632e-09	7.61508e-09	8.23725e-09	8.39721e-09	3.27963e-09	2.14176e-09	1.51401e-09	7.5712e-09	2.92069e-09	8.60999e-09	1.85974e-09	4.29256e-09	2.75471e-09	2.85345e-09	1.93708e-09	2.13446e-09	1.81301e-09	1.89078e-09	1.55634e-09
220	12	1.10465e-09	3.2048e-09	8.19888e-10	1.60654e-09	1.43033e-09	1.55959e-09	8.22044e-10	1.97994e-09	3.0653e-09	2.2412e-09	2.23178e-09	3.55078e-09	3.80682e-09	5.41998e-09	4.23821e-09	5.7601e-09	3.61015e-09	5.58889e-09	9.61799e-09	8.29764e-09	8.93334e-09	9.26641e-09	3.60099e-09	2.39119e-09	1.73942e-09	8.57194e-09	3.26061e-09	9.7284e-09	2.19341e-09	4.75061e-09	2.99718e-09	3.36454e-09	2.37054e-09	2.48398e-09	2.0336e-09	2.27095e-09	1.82477e-09
240	13	1.11402e-09	3.09078e-09	8.04472e-10	1.59603e-09	1.39242e-09	1.57249e-09	8.18941e-10	2.04349e-09	3.11492e-09	2.29919e-09	2.22074e-09	3.76945e-09	3.77036e-09	5.78701e-09	4.56712e-09	6.24321e-09	3.86555e-09	5.99441e-09	1.05465e-08	9.10855e-09	1.00764e-08	1.0229e-08	4.07712e-09	2.67559e-09	1.93582e-09	9.54077e-09	3.53939e-09	1.10148e-08	2.39804e-09	5.57879e-09	3.72693e-09	4.02562e-09	2.66109e-09	3.00874e-09	2.45065e-09	2.64074e-09	2.04654e-09
260	14	1.11689e-09	3.18782e-09	8.01995e-10	1.70656e-09	1.41031e-09	1.70871e-09	8.81303e-10	2.11495e-09	3.14378e-09	2.31103e-09	2.61969e-09	3.84799e-09	4.14154e-09	6.00111e-09	4.79579e-09	6.68652e-09	4.19555e-09	6.69279e-09	1.20862e-08	9.90872e-09	1.11462e-08	1.13037e-08	4.75859e-09	3.06299e-09	2.22727e-09	1.04445e-08	3.88663e-09	1.2672e-08	2.85876e-09	6.21296e-09	4.24074e-09	4.60358e-09	3.31122e-09	3.43276e-09	2.90624e-09	3.19987e-09	2.62518e-09
280	15	1.13096e-09	3.0363e-09	7.58795e-10	1.69515e-09	1.36438e-09	1.78681e-09	8.90029e-10	2.14339e-09	3.25054e-09	2.468e-09	2.79983e-09	4.15712e-09	4.34955e-09	6.3931e-09	5.12054e-09	7.14395e-09	4.66268e-09	7.23874e-09	1.36583e-08	1.09418e-08	1.24212e-08	1.25201e-08	5.43968e-09	3.35078e-09	2.66856e-09	1.16526e-08	4.61274e-09	1.44021e-08	3.34037e-09	7.26238e-09	5.12762e-09	5.44655e-09	4.08481e-09	4.11227e-09	3.62664e-09	3.78426e-09	3.20302e-09
300	16	1.08647e-09	2.95239e-09	7.69024e-10	1.7104e-09	1.32573e-09	1.88602e-09	8.96305e-10	2.12182e-09	3.33848e-09	2.43126e-09	2.88268e-09	4.26575e-09	4.90117e-09	6.73442e-09	5.80307e-09	7.89088e-09	5.3826e-09	7.87499e-09	1.51459e-08	1.1669e-08	1.32196e-08	1.36146e-08	6.09573e-09	3.55735e-09	3.01219e-09	1.33991e-08	5.14713e-09	1.63095e-08	4.08944e-09	9.44365e-09	6.55142e-09	6.52707e-09	4.54588e-09	5.10349e-09	4.65868e-09	4.93502e-09	3.97683e-09
320	17	1.09055e-09	2.76634e-09	7.26154e-10	1.60401e-09	1.32243e-09	1.84404e-09	8.73376e-10	2.02313e-09	3.48731e-09	2.41634e-09	2.6626e-09	4.24582e-09	4.64898e-09	6.77915e-09	5.99499e-09	8.11413e-09	5.41312e-09	8.12418e-09	1.65808e-08	1.24258e-08	1.41519e-08	1.40759e-08	6.39357e-09	3.62528e-09	3.22676e-09	1.45263e-08	5.84975e-09	1.84723e-08	4.39604e-09	1.10347e-08	7.80686e-09	7.50897e-09	5.29014e-09	5.9534e-09	5.53491e-09	5.19822e-09	4.35591e-09
340	18	1.04216e-09	2.75887e-09	6.94212e-10	1.63042e-09	1.29131e-09	1.89374e-09	8.8839e-10	1.86891e-09	3.56217e-09	2.36376e-09	2.89708e-09	4.18681e-09	5.22049e-09	6.64328e-09	6.27591e-09	8.18863e-09	5.9291e-09	8.49663e-09	1.69869e-08	1.28718e-08	1.4024e-08	1.4733e-08	6.79906e-09	3.80248e-09	3.6429e-09	1.54922e-08	6.48153e-09	1.98011e-08	4.98356e-09	1.16035e-08	8.12189e-09	7.99072e-09	6.20879e-09	6.15401e-09	6.06644e-09	6.02182e-09	5.23169e-09
360	19	1.0131e-09	2.7883e-09	7.25202e-10	1.66365e-09	1.31941e-09	1.93309e-09	9.25654e-10	2.02386e-09	3.70971e-09	2.40179e-09	2.88341e-09	4.45049e-09	5.52138e-09	7.08794e-09	6.73421e-09	8.82733e-09	6.36769e-09	8.97921e-09	1.80376e-08	1.39532e-08	1.47411e-08	1.56678e-08	7.02026e-09	3.93607e-09	3.8043e-09	1.7249e-08	6.75292e-09	2.16876e-08	5.48377e-09	1.3384e-08	8.97849e-09	9.2006e-09	6.58062e-09	7.44647e-09	6.73447e-09	6.84634e-09	5.88906e-09
380	20	9.71444e-10	2.73374e-09	7.18718e-10	1.60468e-09	1.32137e-09	1.89018e-09	9.29014e-10	1.98201e-09	3.73757e-09	2.34767e-09	2.83715e-09	4.38044e-09	5.6565e-09	7.16738e-09	7.03241e-09	9.06968e-09	6.65482e-09	9.36534e-09	1.88312e-08	1.46029e-08	1.54328e-08	1.63931e-08	7.33625e-09	4.24833e-09	4.08771e-09	1.90328e-08	7.3725e-09	2.40948e-08	6.06326e-09	1.4755e-08	9.95696e-09	1.02071e-08	7.35193e-09	8.19924e-09	7.40828e-09	7.63975e-09	6.44369e-09
400	21	9.4329e-10	2.58772e-09	6.78836e-10	1.48671e-09	1.2842e-09	1.77496e-09	8.99407e-10	1.87678e-09	3.67205e-09	2.25468e-09	2.77188e-09	4.24409e-09	5.46853e-09	7.15313e-09	6.96132e-09	8.92048e-09	6.60346e-09	9.66161e-09	1.95198e-08	1.53178e-08	1.64575e-08	1.71594e-08	7.76935e-09	4.71997e-09	4.58028e-09	2.10131e-08	8.48547e-09	2.7028e-08	6.67317e-09	1.54666e-08	1.08428e-08	1.10455e-08	8.45565e-09	8.65205e-09	7.98818e-09	7.9556e-09	6.64728e-09
420	22	9.13405e-10	2.53252e-09	6.81464e-10	1.45813e-09	1.27451e-09	1.76824e-09	8.9045e-10	1.88817e-09	3.59324e-09	2.23315e-09	2.75006e-09	4.14993e-09	5.53475e-09	7.13288e-09	7.1339e-09	9.08978e-09	6.89251e-09	1.02133e-08	2.07935e-08	1.65883e-08	1.81537e-08	1.87918e-08	8.74431e-09	5.45383e-09	5.31891e-09	2.37054e-08	9.84142e-09	3.09197e-08	7.39843e-09	1.67146e-08	1.19372e-08	1.20217e-08	9.19206e-09	9.06606e-09	8.46186e-09	8.58066e-09	7.00805e-09
440	23	8.93532e-10	2.52134e-09	7.1289e-10	1.45346e-09	1.33911e-09	1.76637e-09	8.89895e-10	2.03079e-09	3.55509e-09	2.25397e-09	2.77677e-09	4.30667e-09	5.67627e-09	7.50515e-09	7.38399e-09	9.60855e-09	7.15943e-09	1.09266e-08	2.27696e-08	1.78431e-08	1.97046e-08	2.01202e-08	9.32616e-09	5.97035e-09	5.75404e-09	2.66494e-08	1.04206e-08	3.49856e-08	8.06632e-09	1.88286e-08	1.34513e-08	1.31875e-08	9.27413e-09	9.90791e-09	9.0116e-09	8.90692e-09	7.21102e-09
460	24	8.65659e-10	2.35392e-09	6.74803e-10	1.38722e-09	1.30669e-09	1.69098e-09	8.19231e-10	1.82274e-09	3.42954e-09	2.2431e-09	2.6768e-09	4.24466e-09	5.75252e-09	7.40798e-09	7.55345e-09	9.59407e-09	7.58243e-09	1.11831e-08	2.35608e-08	1.85265e-08	2.08631e-08	2.13181e-08	1.04134e-08	6.85506e-09	6.79218e-09	2.87034e-08	1.24074e-08	3.85352e-08	8.98042e-09	1.9165e-08	1.37844e-08	1.37382e-08	1.0094e-08	9.42541e-09	8.94961e-09	8.9516e-09	7.06605e-09
480	25	8.36613e-10	2.30627e-09	6.94771e-10	1.39098e-09	1.30731e-09	1.70642e-09	8.14212e-10	1.80314e-09	3.33626e-09	2.1608e-09	2.76627e-09	4.27718e-09	6.05763e-09	7.50933e-09	7.87658e-09	1.01617e-08	7.88354e-09	1.2046e-08	2.52558e-08	1.99074e-08	2.25115e-08	2.34273e-08	1.12555e-08	7.6429e-09	7.56923e-09	3.19372e-08	1.38114e-08	4.33484e-08	9.87354e-09	2.00981e-08	1.36592e-08	1.41272e-08	9.78731e-09	9.32085e-09	8.4233e-09	8.65446e-09	6.48152e-09
500	26	8.44977e-10	2.27172e-09	7.09885e-10	1.44343e-09	1.35383e-09	1.74247e-09	7.89581e-10	1.74264e-09	3.46498e-09	2.10465e-09	2.78973e-09	4.35062e-09	6.15108e-09	7.54772e-09	8.22708e-09	1.08126e-08	8.27482e-09	1.26037e-08	2.70392e-08	2.16643e-08	2.45678e-08	2.61711e-08	1.22912e-08	8.47796e-09	8.47698e-09	3.43113e-08	1.52373e-08	4.66955e-08	1.02921e-08	2.10382e-08	1.31079e-08	1.44822e-08	9.45459e-09	8.86189e-09	7.42973e-09	7.95776e-09	5.86246e-09
520	27	7.88966e-10	2.19636e-09	7.12575e-10	1.45481e-09	1.36183e-09	1.77993e-09	7.63716e-10	1.73277e-09	3.36322e-09	2.05256e-09	2.74813e-09	4.36879e-09	6.476e-09	7.70423e-09	8.77711e-09	1.1091e-08	9.11182e-09	1.32681e-08	2.83418e-08	2.33507e-08	2.70519e-08	2.9076e-08	1.34475e-08	9.19322e-09	9.13861e-09	3.78321e-08	1.60355e-08	4.78983e-08	1.05549e-08	2.11217e-08	1.24181e-08	1.33711e-08	8.57329e-09	8.03882e-09	6.60122e-09	7.18476e-09	5.08119e-09
540	28	7.6454e-10	2.06399e-09	7.00434e-10	1.40493e-09	1.3512e-09	1.76528e-09	7.87719e-10	1.67461e-09	3.27763e-09	2.05e-09	2.85064e-09	4.53141e-09	6.52981e-09	7.98784e-09	8.94828e-09	1.16044e-08	9.52348e-09	1.40986e-08	3.07536e-08	2.52311e-08	3.10126e-08	3.22188e-08	1.49065e-08	1.01304e-08	1.02451e-08	4.05821e-08	1.82053e-08	5.19063e-08	1.0832e-08	2.07987e-08	1.15088e-08	1.29938e-08	8.23135e-09	7.33551e-09	5.58912e-09	6.28801e-09	4.01387e-09
560	29	7.34287e-10	2.01249e-09	7.18814e-10	1.39952e-09	1.35532e-09	1.81171e-09	8.47456e-10	1.84728e-09	3.38135e-09	2.10723e-09	3.02297e-09	4.71088e-09	6.76008e-09	8.34857e-09	9.12784e-09	1.23746e-08	9.91113e-09	1.51487e-08	3.3636e-08	2.69077e-08	3.40612e-08	3.56191e-08	1.56682e-08	1.05089e-08	1.07665e-08	4.34811e-08	1.83468e-08	5.46665e-08	1.03414e-08	2.12269e-08	1.09185e-08	1.22945e-08	6.99682e-09	6.88122e-09	4.78323e-09	5.33162e-09	3.12468e-09
580	30	7.17285e-10	1.94442e-09	7.24039e-10	1.41615e-09	1.35778e-09	1.84582e-09	8.30611e-10	1.86542e-09	3.38749e-09	2.08745e-09	3.03487e-09	4.75402e-09	6.97221e-09	8.4846e-09	9.36432e-09	1.31009e-08	1.06289e-08	1.57164e-08	3.54856e-08	2.82923e-08	3.68978e-08	3.82283e-08	1.69418e-08	1.1165e-08	1.09176e-08	4.36292e-08	1.78475e-08	5.31008e-08	9.58822e-09	1.99923e-08	9.67419e-09	1.11823e-08	6.21397e-09	5.80244e-09	3.94365e-09	4.51409e-09	2.53695e-09
600	31	7.00187e-10	1.82933e-09	6.92713e-10	1.38429e-09	1.38001e-09	1.83028e-09	8.0439e-10	1.71415e-09	3.30188e-09	2.00022e-09	2.69032e-09	4.45685e-09	6.7985e-09	8.06168e-09	9.39589e-09	1.29181e-08	1.06147e-08	1.59688e-08	3.64759e-08	2.99063e-08	3.91263e-08	3.98368e-08	1.83781e-08	1.15056e-08	1.11797e-08	4.3482e-08	1.75612e-08	5.13211e-08	8.55846e-09	1.80215e-08	7.99427e-09	9.46201e-09	4.95702e-09	4.60464e-09	2.97884e-09	3.60498e-09	1.85551e-09
620	32	6.88053e-10	1.83806e-09	6.99537e-10	1.42699e-09	1.45433e-09	1.92259e-09	9.10545e-10	1.78208e-09	3.36029e-09	2.05399e-09	3.08054e-09	4.80255e-09	7.34778e-09	8.52219e-09	9.67211e-09	1.41838e-08	1.12804e-08	1.71636e-08	3.90462e-08	3.09775e-08	4.06726e-08	4.03679e-08	1.84559e-08	1.14234e-08	1.09551e-08	4.15853e-08	1.66602e-08	5.03856e-08	7.84175e-09	1.66004e-08	6.36901e-09	8.82067e-09	4.09637e-09	3.93852e-09	2.23589e-09	3.17557e-09	1.56084e-09
640	33	6.52863e-10	1.77749e-09	6.8773e-10	1.43144e-09	1.50405e-09	1.99697e-09	9.1482e-10	1.91954e-09	3.44337e-09	2.03593e-09	2.96181e-09	4.59732e-09	7.51515e-09	8.52424e-09	1.00136e-08	1.45199e-08	1.1957e-08	1.79944e-08	4.07646e-08	3.21971e-08	4.18924e-08	4.11599e-08	1.91358e-08	1.13437e-08	1.05938e-08	3.95612e-08	1.50926e-08	4.35262e-08	6.71335e-09	1.37612e-08	4.87116e-09	6.95357e-09	3.14343e-09	2.96853e-09	1.72441e-09	2.47742e-09	1.20656e-09
660	34	6.45393e-10	1.74779e-09	6.87543e-10	1.43636e-09	1.58114e-09	2.02831e-09	9.2037e-10	1.98406e-09	3.38341e-09	2.00973e-09	2.88213e-09	4.64835e-09	7.51934e-09	8.6966e-09	1.0154e-08	1.48142e-08	1.22894e-08	1.89738e-08	4.29892e-08	3.45729e-08	4.43221e-08	4.11412e-08	1.94377e-08	1.12144e-08	1.01005e-08	3.63956e-08	1.38754e-08	3.75444e-08	5.68705e-09	1.13225e-08	3.75653e-09	5.53048e-09	2.47572e-09	2.21068e-09	1.37359e-09	1.95729e-09	9.30191e-10
680	35	6.25553e-10	1.71456e-09	6.69663e-10	1.41691e-09	1.65548e-09	2.06325e-09	9.73729e-10	2.05082e-09	3.41952e-09	2.05666e-09	2.89301e-09	4.74408e-09	7.4963e-09	8.86714e-09	1.0344e-08	1.49293e-08	1.23077e-08	2.02665e-08	4.51025e-08	3.61292e-08	4.45516e-08	4.06962e-08	1.84753e-08	1.03735e-08	9.54015e-09	3.31927e-08	1.25315e-08	3.22757e-08	4.58177e-09	9.44299e-09	3.16745e-09	4.28814e-09	1.88909e-09	1.73099e-09	1.19578e-09	1.51628e-09	7.44751e-10
700	36	5.84773e-10	1.87388e-09	7.22552e-10	1.44464e-09	1.7132e-09	2.19928e-09	9.97578e-10	2.36839e-09	3.4815e-09	2.07223e-09	3.30936e-09	4.95788e-09	7.87714e-09	9.43347e-09	1.07114e-08	1.6452e-08	1.32345e-08	2.20016e-08	4.70754e-08	3.70933e-08	4.43722e-08	3.87616e-08	1.65462e-08	9.56027e-09	8.1888e-09	2.86987e-08	1.00909e-08	2.60494e-08	3.5904e-09	7.38089e-09	2.39465e-09	3.31076e-09	1.42312e-09	1.38924e-09	1.00745e-09	1.24212e-09	6.59533e-10
720	37	5.75871e-10	1.75787e-09	6.99118e-10	1.40793e-09	1.70658e-09	2.2001e-09	9.99069e-10	2.30883e-09	3.53266e-09	1.97127e-09	2.96006e-09	4.55484e-09	7.45646e-09	8.6368e-09	1.04748e-08	1.59567e-08	1.30008e-08	2.22454e-08	4.87649e-08	3.89287e-08	4.39823e-08	3.70712e-08	1.61562e-08	9.21362e-09	7.46646e-09	2.49666e-08	8.52136e-09	2.01758e-08	2.73086e-09	5.50993e-09	2.01059e-09	2.52902e-09	1.23967e-09	1.13219e-09	8.72725e-10	1.05416e-09	5.85081e-10
740	38	5.7378e-10	1.83824e-09	7.3047e-10	1.40392e-09	1.71504e-09	2.24864e-09	1.0808e-09	2.32515e-09	3.59565e-09	1.94658e-09	3.14123e-09	4.7472e-09	7.43788e-09	8.97929e-09	1.07962e-08	1.73174e-08	1.37712e-08	2.38644e-08	4.98781e-08	4.09419e-08	4.37872e-08	3.51402e-08	1.44579e-08	8.15445e-09	6.285e-09	2.07635e-08	6.82548e-09	1.69507e-08	2.10394e-09	5.11274e-09	1.74455e-09	2.37802e-09	1.14598e-09	1.09819e-09	7.58253e-10	9.76294e-10	5.52584e-10
760	39	5.43388e-10	1.9143e-09	7.52529e-10	1.426e-09	1.74138e-09	2.43526e-09	1.15579e-09	2.50821e-09	3.75978e-09	1.9366e-09	3.28206e-09	4.76618e-09	7.32512e-09	9.59089e-09	1.15319e-08	1.86019e-08	1.53476e-08	2.54887e-08	5.02714e-08	4.13215e-08	4.20355e-08	3.27433e-08	1.33153e-08	6.83048e-09	5.18519e-09	1.6843e-08	5.5039e-09	1.29436e-08	1.72622e-09	4.11517e-09	1.53924e-09	1.98536e-09	1.01237e-09	9.68827e-10	6.93453e-10	8.08624e-10	5.01374e-10
780	40	5.39169e-10	1.94984e-09	7.72658e-10	1.44396e-09	1.77778e-09	2.54085e-09	1.22626e-09	2.61183e-09	3.95986e-09	1.95741e-09	3.34522e-09	4.75907e-09	7.30244e-09	1.01176e-08	1.22004e-08	1.97158e-08	1.68222e-08	2.66532e-08	5.10099e-08	4.19464e-08	4.08568e-08	3.01601e-08	1.24121e-08	5.99844e-09	4.43711e-09	1.36615e-08	4.81583e-09	1.05396e-08	1.51445e-09	3.485e-09	1.39552e-09	1.79245e-09	9.52379e-10	8.94818e-10	6.60561e-10	7.07778e-10	4.89387e-10
800	41	5.43879e-10	1.8768e-09	7.68927e-10	1.46479e-09	1.78908e-09	2.59264e-09	1.32358e-09	2.62293e-09	4.25591e-09	2.01775e-09	3.37266e-09	4.73217e-09	7.27619e-09	1.06438e-08	1.31316e-08	2.02906e-08	1.76524e-08	2.72149e-08	5.07656e-08	4.01524e-08	3.74112e-08	2.72026e-08	1.08442e-08	4.79444e-09	3.5223e-09	1.09352e-08	3.92687e-09	9.2519e-09	1.33649e-09	2.91153e-09	1.32361e-09	1.60535e-09	8.8242e-10	8.22857e-10	6.43741e-10	5.94705e-10	4.67604e-10
820	42	5.38316e-10	2.01866e-09	8.45736e-10	1.50757e-09	1.88428e-09	2.76961e-09	1.33304e-09	2.84888e-09	4.27248e-09	1.98132e-09	3.84746e-09	4.8634e-09	7.91069e-09	1.24218e-08	1.46383e-08	2.25048e-08	1.90868e-08	2.85567e-08	4.91633e-08	3.83844e-08	3.4374e-08	2.53887e-08	9.05985e-09	3.81096e-09	2.82024e-09	8.36336e-09	3.34445e-09	7.66321e-09	1.2532e-09	2.40292e-09	1.16392e-09	1.46439e-09	7.75239e-10	7.93114e-10	5.84656e-10	5.32705e-10	4.62508e-10
840	43	5.48093e-10	1.9802e-09	8.51098e-10	1.56305e-09	2.00279e-09	2.87902e-09	1.34159e-09	2.98391e-09	4.60248e-09	2.08831e-09	3.58145e-09	4.65777e-09	8.28876e-09	1.23736e-08	1.57883e-08	2.27701e-08	1.91269e-08	2.80432e-08	4.85485e-08	3.53149e-08	3.01078e-08	2.26108e-08	7.66717e-09	3.25163e-09	2.31005e-09	6.86845e-09	2.84973e-09	6.91573e-09	1.1324e-09	2.11398e-09	1.03432e-09	1.30676e-09	6.72976e-10	7.44011e-10	5.73627e-10	5.00212e-10	4.60587e-10
860	44	5.77429e-10	1.83739e-09	8.59567e-10	1.62038e-09	2.1784e-09	3.01537e-09	1.37623e-09	3.02324e-09	4.99905e-09	2.19937e-09	3.73055e-09	4.66684e-09	8.886e-09	1.23563e-08	1.74259e-08	2.32662e-08	1.96744e-08	2.76073e-08	4.75069e-08	3.25389e-08	2.62189e-08	2.00665e-08	6.10856e-09	3.06972e-09	1.9195e-09	6.22228e-09	2.66781e-09	6.69704e-09	1.03403e-09	2.05303e-09	9.34787e-10	1.25342e-09	6.48462e-10	7.67451e-10	5.62833e-10	5.38729e-10	4.72669e-10
880	45	5.92371e-10	1.79152e-09	8.91841e-10	1.6856e-09	2.25795e-09	3.21303e-09	1.42984e-09	3.32602e-09	5.20815e-09	2.25244e-09	3.89778e-09	4.46369e-09	9.20045e-09	1.33558e-08	1.87179e-08	2.3401e-08	2.006e-08	2.65539e-08	4.37833e-08	2.80157e-08	2.22109e-08	1.72135e-08	5.02096e-09	2.71899e-09	1.57539e-09	5.6746e-09	2.56542e-09	5.8455e-09	9.39533e-10	1.81284e-09	8.5866e-10	1.13037e-09	5.95967e-10	7.07711e-10	5.69113e-10	5.20934e-10	4.4024e-10
900	46	6.09599e-10	1.72158e-09	9.12493e-10	1.71256e-09	2.38945e-09	3.41889e-09	1.47827e-09	3.47251e-09	5.30248e-09	2.34084e-09	3.97496e-09	4.62991e-09	9.71369e-09	1.40409e-08	1.95788e-08	2.39657e-08	2.01385e-08	2.57364e-08	4.13795e-08	2.61114e-08	1.97858e-08	1.55292e-08	4.54225e-09	2.70715e-09	1.51607e-09	5.40124e-09	2.49792e-09	5.1595e-09	8.57778e-10	1.65791e-09	7.99369e-10	1.061e-09	5.6865e-10	6.89631e-10	5.60941e-10	5.34186e-10	4.35581e-10
920	47	6.38372e-10	1.61056e-09	9.14705e-10	1.74573e-09	2.55008e-09	3.55005e-09	1.5819e-09	3.60728e-09	5.72811e-09	2.62773e-09	4.16916e-09	5.14492e-09	9.85349e-09	1.4741e-08	2.01806e-08	2.37869e-08	1.97825e-08	2.46393e-08	3.90527e-08	2.26899e-08	1.61583e-08	1.25361e-08	3.73951e-09	2.34221e-09	1.26679e-09	4.81503e-09	2.25778e-09	4.60498e-09	7.67646e-10	1.60456e-09	8.00723e-10	1.00056e-09	5.54483e-10	6.59791e-10	5.79681e-10	4.97903e-10	4.07483e-10
940	48	6.70454e-10	1.55073e-09	9.72017e-10	1.85884e-09	2.85014e-09	3.9111e-09	1.61351e-09	3.98501e-09	6.1999e-09	2.86754e-09	4.77771e-09	5.76791e-09	1.06214e-08	1.6506e-08	2.10986e-08	2.39414e-08	2.01495e-08	2.3905e-08	3.48945e-08	2.03281e-08	1.35438e-08	1.07033e-08	3.23769e-09	2.28518e-09	1.07732e-09	4.27574e-09	2.16538e-09	3.99246e-09	7.23412e-10	1.47801e-09	7.53084e-10	9.52685e-10	5.54948e-10	6.4092e-10	5.61088e-10	5.10125e-10	3.91266e-10
960	49	6.76867e-10	1.58748e-09	1.02446e-09	1.94966e-09	2.94294e-09	4.13414e-09	1.68538e-09	4.33139e-09	6.52839e-09	2.95096e-09	4.95211e-09	5.89322e-09	1.11214e-08	1.77217e-08	2.09482e-08	2.35313e-08	1.84002e-08	2.22109e-08	3.04179e-08	1.76129e-08	1.10182e-08	9.07099e-09	2.74289e-09	2.1309e-09	9.10195e-10	3.70132e-09	1.85644e-09	3.51483e-09	6.77855e-10	1.3319e-09	6.97261e-10	8.6796e-10	5.32095e-10	5.97608e-10	5.17972e-10	4.96604e-10	3.69346e-10
980	50	6.81983e-10	1.56878e-09	1.00899e-09	2.08689e-09	3.19758e-09	4.32292e-09	1.71849e-09	4.6734e-09	7.04016e-09	3.32176e-09	4.71585e-09	6.3554e-09	1.1405e-08	1.78474e-08	2.10319e-08	2.29907e-08	1.69184e-08	2.02103e-08	2.7223e-08	1.62957e-08	9.31557e-09	8.17465e-09	2.35411e-09	1.87895e-09	7.90289e-10	3.08538e-09	1.46871e-09	3.19548e-09	6.36756e-10	1.27125e-09	6.31635e-10	8.12998e-10	5.09292e-10	5.78408e-10	4.81637e-10	4.77461e-10	3.70726e-10
1000	51	6.92908e-10	1.5244e-09	1.0131e-09	2.17209e-09	3.30441e-09	4.44941e-09	1.79616e-09	4.81252e-09	7.28694e-09	3.46975e-09	4.86839e-09	6.67039e-09	1.15349e-08	1.8304e-08	2.12038e-08	2.17577e-08	1.60747e-08	1.87668e-08	2.39695e-08	1.40773e-08	7.75395e-09	7.34367e-09	2.08655e-09	1.75554e-09	7.19449e-10	2.72041e-09	1.33967e-09	3.0414e-09	6.08256e-10	1.20048e-09	5.98561e-10	7.65007e-10	5.03372e-10	5.60755e-10	4.55816e-10	4.74286e-10	3.58376e-10
1020	52	6.96831e-10	1.50499e-09	1.03342e-09	2.22707e-09	3.30423e-09	4.39392e-09	1.85738e-09	4.96897e-09	7.38721e-09	3.53901e-09	5.06753e-09	6.62328e-09	1.23614e-08	1.92562e-08	2.1395e-08	2.09982e-08	1.50808e-08	1.75529e-08	2.06256e-08	1.20292e-08	6.94088e-09	6.76688e-09	1.95865e-09	1.69573e-09	6.47023e-10	2.44545e-09	1.26643e-09	2.96136e-09	5.71227e-10	1.16746e-09	5.60567e-10	7.15847e-10	4.64598e-10	5.40235e-10	4.32056e-10	4.89085e-10	3.33391e-10
1040	53	6.80992e-10	1.50194e-09	1.00428e-09	2.27053e-09	3.24927e-09	4.35197e-09	1.9771e-09	5.0421e-09	7.41406e-09	3.60875e-09	5.14349e-09	6.56286e-09	1.24163e-08	1.98095e-08	2.08971e-08	1.99579e-08	1.34716e-08	1.58025e-08	1.78348e-08	9.91309e-09	6.01236e-09	5.94277e-09	1.6961e-09	1.44628e-09	5.97596e-10	2.16404e-09	1.21604e-09	2.8025e-09	5.53572e-10	1.1141e-09	5.44453e-10	6.64148e-10	4.46087e-10	5.1367e-10	4.10255e-10	4.66857e-10	3.0862e-10
1060	54	6.68506e-10	1.49213e-09	9.72654e-10	2.28303e-09	3.2586e-09	4.30174e-09	1.94687e-09	5.10061e-09	7.24357e-09	3.76114e-09	5.18552e-09	6.55293e-09	1.28037e-08	1.99261e-08	2.00382e-08	1.87852e-08	1.25603e-08	1.43537e-08	1.52643e-08	8.3533e-09	5.53915e-09	5.30989e-09	1.50926e-09	1.33094e-09	5.51479e-10	1.94159e-09	1.20244e-09	2.67876e-09	5.25277e-10	1.07086e-09	5.08529e-10	6.37719e-10	4.19739e-10	4.97716e-10	3.91145e-10	4.65204e-10	2.98898e-10
1080	55	6.59446e-10	1.51033e-09	9.75473e-10	2.26223e-09	3.21541e-09	4.28869e-09	2.02948e-09	5.10006e-09	7.07985e-09	3.81101e-09	5.70782e-09	6.52357e-09	1.29295e-08	2.07995e-08	1.92913e-08	1.75548e-08	1.15381e-08	1.28637e-08	1.34421e-08	6.99881e-09	5.06107e-09	4.42132e-09	1.34491e-09	1.24325e-09	5.26136e-10	1.83035e-09	1.33547e-09	2.61886e-09	5.19227e-10	1.02921e-09	4.95052e-10	6.2988e-10	4.2134e-10	4.93889e-10	3.75171e-10	4.54545e-10	2.76613e-10
1100	56	6.47643e-10	1.54541e-09	9.72713e-10	2.34541e-09	3.35094e-09	4.35354e-09	2.1511e-09	5.15878e-09	7.20991e-09	3.9358e-09	5.67484e-09	6.61571e-09	1.34901e-08	2.02279e-08	1.76145e-08	1.61172e-08	9.98923e-09	1.15982e-08	1.16003e-08	6.16924e-09	4.83163e-09	3.85383e-09	1.19136e-09	1.21996e-09	5.00868e-10	1.69639e-09	1.2115e-09	2.52372e-09	4.90668e-10	9.73449e-10	4.69315e-10	5.84762e-10	3.81594e-10	4.66073e-10	3.53666e-10	4.41394e-10	2.60641e-10
1120	57	6.33934e-10	1.59281e-09	9.58667e-10	2.46959e-09	3.55487e-09	4.63082e-09	2.28758e-09	5.54191e-09	7.71532e-09	4.30724e-09	6.08265e-09	7.12479e-09	1.41254e-08	1.96521e-08	1.68532e-08	1.48284e-08	8.84165e-09	9.93577e-09	1.00783e-08	5.82764e-09	4.77774e-09	3.73577e-09	1.1324e-09	1.21239e-09	4.91871e-10	1.59075e-09	1.19106e-09	2.31529e-09	4.79564e-10	9.04833e-10	4.50041e-10	5.57627e-10	3.77688e-10	4.51572e-10	3.48117e-10	4.26599e-10	2.68275e-10
1140	58	6.27759e-10	1.6222e-09	9.59314e-10	2.47873e-09	3.60838e-09	4.60319e-09	2.3643e-09	5.66472e-09	7.87146e-09	4.59817e-09	6.60808e-09	7.48933e-09	1.4457e-08	1.85361e-08	1.56506e-08	1.33498e-08	7.79641e-09	8.60297e-09	9.03231e-09	5.242e-09	4.37852e-09	3.30804e-09	1.0046e-09	1.18884e-09	4.66729e-10	1.47964e-09	1.1689e-09	2.19193e-09	4.60569e-10	8.48022e-10	4.29704e-10	5.21954e-10	3.58552e-10	4.28216e-10	3.3394e-10	4.01587e-10	2.64076e-10
1160	59	6.14915e-10	1.76817e-09	9.96776e-10	2.54633e-09	3.73338e-09	4.89039e-09	2.41735e-09	6.00987e-09	8.35804e-09	5.02222e-09	7.05634e-09	7.51242e-09	1.40907e-08	1.78354e-08	1.4992e-08	1.18981e-08	6.91163e-09	7.03898e-09	8.31171e-09	4.83571e-09	3.97804e-09	2.92487e-09	9.60313e-10	1.00603e-09	4.46877e-10	1.36568e-09	1.24554e-09	1.9686e-09	4.72552e-10	8.04261e-10	4.3009e-10	4.86892e-10	3.46972e-10	4.02821e-10	3.32503e-10	3.42765e-10	2.4558e-10
1180	60	6.22647e-10	1.72491e-09	1.02965e-09	2.52338e-09	3.86681e-09	4.91915e-09	2.57776e-09	5.94888e-09	8.43848e-09	5.02319e-09	7.66289e-09	7.87984e-09	1.42056e-08	1.63845e-08	1.36156e-08	1.08153e-08	6.12465e-09	6.94889e-09	7.85904e-09	4.73583e-09	3.90345e-09	2.84132e-09	9.0393e-10	1.20537e-09	4.47158e-10	1.33355e-09	1.26413e-09	2.04159e-09	4.26632e-10	7.51504e-10	4.07509e-10	4.54955e-10	3.36057e-10	3.86069e-10	3.06918e-10	3.5929e-10	2.45091e-10
1200	61	6.30211e-10	1.82248e-09	1.06511e-09	2.54606e-09	3.97673e-09	4.97956e-09	2.63513e-09	6.45852e-09	9.25646e-09	5.6394e-09	8.97002e-09	8.43872e-09	1.43181e-08	1.62339e-08	1.33945e-08	1.0198e-08	5.4432e-09	5.94513e-09	7.03383e-09	4.15618e-09	3.41448e-09	2.44094e-09	8.12365e-10	1.15303e-09	3.9759e-10	1.23498e-09	1.38797e-09	1.91919e-09	4.2532e-10	7.2986e-10	3.91249e-10	4.35576e-10	3.44279e-10	3.72261e-10	3.0455e-10	3.37051e-10	2.36849e-10
1220	62	6.32668e-10	1.85009e-09	1.07336e-09	2.59258e-09	4.12902e-09	5.14658e-09	2.78079e-09	6.82212e-09	9.64445e-09	6.12808e-09	9.12322e-09	8.73887e-09	1.35112e-08	1.43127e-08	1.18259e-08	8.89077e-09	4.72159e-09	5.27646e-09	6.47609e-09	3.93282e-09	3.09995e-09	2.25788e-09	7.81469e-10	1.13769e-09	3.7852e-10	1.14609e-09	1.24304e-09	1.87995e-09	4.17044e-10	6.90594e-10	3.65954e-10	3.95893e-10	3.3037e-10	3.39695e-10	2.8624e-10	3.18391e-10	2.22848e-10
1240	63	6.34417e-10	1.90951e-09	1.1083e-09	2.58402e-09	4.31098e-09	5.36146e-09	2.8008e-09	6.97501e-09	1.0092e-08	6.57433e-09	9.19875e-09	8.88279e-09	1.28112e-08	1.3066e-08	1.07995e-08	8.09028e-09	4.16847e-09	4.71599e-09	5.93724e-09	3.80952e-09	2.90976e-09	2.08358e-09	7.78853e-10	1.1613e-09	3.55706e-10	1.10395e-09	1.2883e-09	1.83776e-09	4.22547e-10	6.63605e-10	3.62212e-10	3.72406e-10	3.2471e-10	3.20938e-10	2.79958e-10	3.08826e-10	2.08837e-10
1260	64	6.59872e-10	1.89792e-09	1.13461e-09	2.60823e-09	4.42388e-09	5.36469e-09	3.04889e-09	7.22614e-09	1.0508e-08	6.82382e-09	9.79974e-09	9.1618e-09	1.23547e-08	1.16513e-08	9.6058e-09	7.4384e-09	3.67038e-09	4.61781e-09	5.4397e-09	3.63639e-09	2.68105e-09	1.96553e-09	7.26469e-10	1.32158e-09	3.43107e-10	1.09749e-09	1.26209e-09	1.85005e-09	3.99866e-10	6.45892e-10	3.47458e-10	3.50708e-10	3.11973e-10	3.089e-10	2.67029e-10	3.28496e-10	1.95383e-10
1280	65	6.72472e-10	2.09543e-09	1.18693e-09	2.89522e-09	4.72115e-09	5.65788e-09	3.14109e-09	7.99844e-09	1.18846e-08	7.52563e-09	1.03513e-08	9.09393e-09	1.14401e-08	1.04174e-08	8.80771e-09	6.65375e-09	3.28885e-09	3.91505e-09	5.12243e-09	3.56147e-09	2.49916e-09	1.79229e-09	7.26285e-10	1.07842e-09	3.21251e-10	1.05066e-09	1.36251e-09	1.65566e-09	4.15403e-10	6.15434e-10	3.55179e-10	3.31034e-10	3.00845e-10	2.90264e-10	2.66681e-10	2.83953e-10	1.83764e-10
1300	66	6.75119e-10	2.11679e-09	1.20484e-09	2.96611e-09	4.93385e-09	5.88653e-09	3.2885e-09	8.39314e-09	1.23836e-08	7.92749e-09	1.00729e-08	8.86386e-09	1.03647e-08	9.09365e-09	7.60691e-09	5.75782e-09	3.02971e-09	3.57108e-09	4.66484e-09	3.55558e-09	2.41591e-09	1.74219e-09	7.1606e-10	1.05593e-09	3.17115e-10	1.00615e-09	1.37585e-09	1.53095e-09	4.01193e-10	5.57523e-10	3.37525e-10	3.11427e-10	2.78076e-10	2.66452e-10	2.49185e-10	2.78081e-10	1.71905e-10
1320	67	6.78601e-10	2.16308e-09	1.23371e-09	3.0315e-09	5.16004e-09	6.10386e-09	3.31778e-09	8.62294e-09	1.31534e-08	8.45543e-09	9.68432e-09	8.7997e-09	9.63826e-09	8.23768e-09	6.82761e-09	5.02851e-09	2.7468e-09	3.30565e-09	4.21129e-09	3.28528e-09	2.28162e-09	1.60067e-09	6.72233e-10	1.04231e-09	3.05401e-10	9.82805e-10	1.35648e-09	1.40391e-09	3.95412e-10	5.34294e-10	3.3196e-10	3.00963e-10	2.64577e-10	2.61491e-10	2.36896e-10	2.76793e-10	1.65183e-10
1340	68	6.98795e-10	2.21826e-09	1.25868e-09	3.13442e-09	5.34638e-09	6.27613e-09	3.58536e-09	9.01083e-09	1.39477e-08	8.96096e-09	1.01075e-08	8.84977e-09	9.00534e-09	7.31525e-09	6.17781e-09	4.41034e-09	2.49753e-09	3.16997e-09	3.94256e-09	3.09931e-09	2.23663e-09	1.54661e-09	6.31771e-10	1.00899e-09	3.10645e-10	9.66863e-10	1.40854e-09	1.31812e-09	3.85227e-10	5.23847e-10	3.28649e-10	3.07241e-10	2.58254e-10	2.66463e-10	2.25199e-10	2.70383e-10	1.60552e-10
1360	69	7.31846e-10	2.25535e-09	1.29759e-09	3.24606e-09	5.64021e-09	6.37126e-09	3.79213e-09	9.09953e-09	1.52913e-08	9.60498e-09	1.05656e-08	9.19642e-09	8.6047e-09	6.78495e-09	5.68694e-09	3.87002e-09	2.35624e-09	3.17657e-09	3.69344e-09	2.86691e-09	2.2106e-09	1.48358e-09	6.03953e-10	1.00016e-09	3.08234e-10	9.52311e-10	1.50765e-09	1.3038e-09	3.8624e-10	5.38228e-10	3.30745e-10	3.21321e-10	2.55025e-10	2.82232e-10	2.22308e-10	2.66599e-10	1.63096e-10
1380	70	7.33656e-10	2.22009e-09	1.31687e-09	3.21081e-09	5.8125e-09	6.5014e-09	3.80682e-09	8.70076e-09	1.5824e-08	9.75222e-09	1.0032e-08	9.57318e-09	8.48994e-09	5.90235e-09	5.31251e-09	3.67609e-09	2.18129e-09	3.34213e-09	3.37982e-09	2.65767e-09	2.11015e-09	1.45692e-09	5.5738e-10	1.17276e-09	2.95977e-10	9.62419e-10	1.50209e-09	1.34889e-09	3.72315e-10	5.77277e-10	3.32967e-10	3.31214e-10	2.48283e-10	2.99396e-10	2.09588e-10	2.89918e-10	1.62295e-10
1400	71	7.58723e-10	2.26725e-09	1.37207e-09	3.44708e-09	6.01136e-09	6.75874e-09	3.95577e-09	9.31249e-09	1.64557e-08	1.01971e-08	1.01573e-08	9.02052e-09	7.83806e-09	5.24238e-09	4.9323e-09	3.38336e-09	2.05961e-09	3.15199e-09	3.22549e-09	2.45957e-09	2.05579e-09	1.38437e-09	5.40326e-10	9.98454e-10	2.94765e-10	9.33493e-10	1.62685e-09	1.29422e-09	3.67194e-10	5.63909e-10	3.43268e-10	3.22707e-10	2.39899e-10	2.81957e-10	2.0206e-10	2.52507e-10	1.52016e-10
1420	72	7.99593e-10	2.33323e-09	1.40622e-09	3.51312e-09	6.3228e-09	6.99381e-09	4.30602e-09	9.84617e-09	1.66571e-08	1.04912e-08	1.033e-08	8.90555e-09	7.28129e-09	4.70736e-09	4.5652e-09	3.0871e-09	1.97244e-09	3.13293e-09	3.12936e-09	2.42285e-09	2.10697e-09	1.41889e-09	5.57407e-10	9.88447e-10	3.02963e-10	9.63814e-10	1.63018e-09	1.30424e-09	3.69321e-10	5.72184e-10	3.36575e-10	3.31693e-10	2.41005e-10	2.77316e-10	1.9578e-10	2.39751e-10	1.45533e-10
1440	73	8.23545e-10	2.46723e-09	1.49501e-09	3.83539e-09	6.67307e-09	7.51131e-09	4.50414e-09	1.0754e-08	1.77927e-08	1.06993e-08	1.0327e-08	8.44088e-09	6.69415e-09	4.33488e-09	4.25333e-09	2.95098e-09	1.92309e-09	3.14121e-09	3.0272e-09	2.3912e-09	2.13254e-09	1.4235e-09	5.7557e-10	9.70067e-10	3.03661e-10	9.79376e-10	1.68574e-09	1.32301e-09	3.70913e-10	5.61238e-10	3.27116e-10	3.08889e-10	2.3612e-10	2.53653e-10	1.86076e-10	2.36526e-10	1.37797e-10
1460	74	8.19729e-10	2.51552e-09	1.51387e-09	4.01764e-09	6.86306e-09	7.93215e-09	4.46286e-09	1.10791e-08	1.79591e-08	1.05991e-08	9.41249e-09	8.12854e-09	6.0293e-09	3.78648e-09	3.98804e-09	2.88491e-09	1.89976e-09	3.04979e-09	2.9091e-09	2.33296e-09	2.15328e-09	1.41367e-09	5.74426e-10	9.30329e-10	2.90694e-10	9.83016e-10	1.68782e-09	1.34622e-09	3.64005e-10	5.58088e-10	3.2901e-10	2.94565e-10	2.30569e-10	2.21255e-10	1.79729e-10	2.28964e-10	1.31435e-10
1480	75	8.60585e-10	2.61221e-09	1.55827e-09	4.19891e-09	7.09631e-09	8.2014e-09	4.78454e-09	1.20879e-08	1.875e-08	1.107e-08	9.53784e-09	7.71368e-09	5.47488e-09	3.68367e-09	3.8111e-09	2.83101e-09	1.80518e-09	3.00141e-09	2.73231e-09	2.19476e-09	2.09185e-09	1.37166e-09	5.66532e-10	8.83837e-10	2.93546e-10	9.80878e-10	1.72015e-09	1.37549e-09	3.57546e-10	5.42438e-10	3.20206e-10	2.77586e-10	2.27667e-10	2.04099e-10	1.77516e-10	2.25133e-10	1.20758e-10
1500	76	8.90771e-10	2.77726e-09	1.60302e-09	4.18204e-09	7.38789e-09	8.52969e-09	4.95828e-09	1.162e-08	1.85371e-08	1.07188e-08	9.02043e-09	7.74521e-09	5.13957e-09	3.44903e-09	3.72497e-09	2.78331e-09	1.73249e-09	3.26729e-09	2.68633e-09	2.22875e-09	2.14992e-09	1.44964e-09	5.68254e-10	1.0005e-09	2.99043e-10	1.01316e-09	1.71882e-09	1.4397e-09	3.66908e-10	5.74204e-10	3.19049e-10	2.80724e-10	2.22907e-10	2.14911e-10	1.7386e-10	2.49685e-10	1.19148e-10
1520	77	8.91681e-10	3.0762e-09	1.68883e-09	4.58057e-09	7.81287e-09	9.29424e-09	4.83001e-09	1.21798e-08	1.94688e-08	1.05853e-08	8.18571e-09	6.63265e-09	4.42857e-09	3.20942e-09	3.56001e-09	2.6866e-09	1.73644e-09	2.91619e-09	2.6333e-09	2.1686e-09	2.15871e-09	1.39422e-09	5.68735e-10	8.25253e-10	2.91993e-10	9.63061e-10	1.70398e-09	1.32608e-09	3.6907e-10	5.37134e-10	3.20095e-10	2.52193e-10	2.06031e-10	1.92625e-10	1.68749e-10	2.19902e-10	1.11387e-10
1540	78	9.23827e-10	3.30169e-09	1.73492e-09	4.76991e-09	8.25272e-09	9.63011e-09	5.06732e-09	1.26138e-08	2.00277e-08	1.05674e-08	7.41118e-09	6.23428e-09	4.00667e-09	3.06061e-09	3.49054e-09	2.65388e-09	1.7282e-09	2.95027e-09	2.60988e-09	2.15378e-09	2.16454e-09	1.43213e-09	5.71979e-10	7.91641e-10	2.95835e-10	9.56326e-10	1.72563e-09	1.29392e-09	3.61964e-10	5.36388e-10	3.1193e-10	2.60098e-10	1.98208e-10	1.97539e-10	1.64758e-10	2.13152e-10	1.11427e-10
1560	79	9.59911e-10	3.5048e-09	1.85995e-09	5.06404e-09	8.58855e-09	1.04816e-08	5.42864e-09	1.33927e-08	2.0515e-08	1.03169e-08	6.95285e-09	5.60828e-09	3.62559e-09	3.06091e-09	3.49394e-09	2.67569e-09	1.63966e-09	3.01679e-09	2.59955e-09	2.17097e-09	2.19025e-09	1.50475e-09	5.91581e-10	7.68149e-10	3.15892e-10	9.61199e-10	1.74031e-09	1.25538e-09	3.45655e-10	5.11682e-10	3.01122e-10	2.52276e-10	1.90661e-10	2.03415e-10	1.55075e-10	2.08271e-10	1.13458e-10
1580	80	9.85592e-10	3.84437e-09	1.97985e-09	5.26837e-09	9.27213e-09	1.12649e-08	5.62955e-09	1.35045e-08	1.95522e-08	9.83481e-09	6.10831e-09	5.11975e-09	3.37862e-09	2.94935e-09	3.37541e-09	2.57262e-09	1.61868e-09	2.99164e-09	2.67587e-09	2.19375e-09	2.277e-09	1.56879e-09	6.04785e-10	7.1471e-10	3.19288e-10	9.69111e-10	1.66022e-09	1.20146e-09	3.57593e-10	5.09212e-10	2.95471e-10	2.5174e-10	1.84144e-10	2.10496e-10	1.51325e-10	2.04081e-10	1.15683e-10
1600	81	9.92549e-10	4.19074e-09	2.09386e-09	5.59632e-09	1.00158e-08	1.22454e-08	5.91388e-09	1.4098e-08	2.03095e-08	9.70379e-09	5.16813e-09	4.79605e-09	3.10234e-09	2.92716e-09	3.10769e-09	2.3103e-09	1.60747e-09	3.0734e-09	2.7345e-09	2.15831e-09	2.29049e-09	1.68362e-09	6.26514e-10	6.93506e-10	3.29969e-10	1.00285e-09	1.35497e-09	1.15131e-09	3.51203e-10	4.98713e-10	2.89489e-10	2.48895e-10	1.81382e-10	2.16582e-10	1.46464e-10	2.05424e-10	1.2178e-10
1620	82	1.03122e-09	4.58037e-09	2.22651e-09	5.86465e-09	1.04127e-08	1.25148e-08	6.13998e-09	1.42507e-08	1.99344e-08	9.162e-09	5.25571e-09	4.55555e-09	2.84624e-09	2.86115e-09	3.06575e-09	2.35373e-09	1.58707e-09	3.0366e-09	2.72456e-09	2.18486e-09	2.34994e-09	1.63925e-09	6.18616e-10	6.86578e-10	3.18609e-10	9.99745e-10	1.58894e-09	1.18045e-09	3.46131e-10	4.83718e-10	2.83826e-10	2.4575e-10	1.79749e-10	2.15909e-10	1.41823e-10	2.025e-10	1.1614e-10
1640	83	1.06261e-09	4.76493e-09	2.43517e-09	6.36535e-09	1.12479e-08	1.37369e-08	6.41963e-09	1.4249e-08	1.91938e-08	8.64483e-09	4.69113e-09	4.31594e-09	2.72411e-09	2.87443e-09	2.95333e-09	2.26021e-09	1.56168e-09	3.05537e-09	2.80473e-09	2.2206e-09	2.44412e-09	1.71374e-09	6.36991e-10	6.41436e-10	3.26939e-10	1.01062e-09	1.46241e-09	1.17605e-09	3.47393e-10	4.80375e-10	2.86454e-10	2.33262e-10	1.75558e-10	2.09694e-10	1.37461e-10	2.00451e-10	1.14579e-10
1660	84	1.09905e-09	5.2975e-09	2.6045e-09	6.70791e-09	1.2212e-08	1.39954e-08	6.55007e-09	1.41028e-08	1.74302e-08	8.50462e-09	4.06237e-09	4.36371e-09	2.69206e-09	2.90314e-09	2.78674e-09	2.1731e-09	1.60346e-09	3.04977e-09	2.88986e-09	2.24924e-09	2.5384e-09	1.82387e-09	6.5696e-10	5.79788e-10	3.33926e-10	1.0195e-09	1.30524e-09	1.14556e-09	3.56006e-10	4.82205e-10	2.88089e-10	2.34327e-10	1.72758e-10	2.11545e-10	1.35541e-10	1.96599e-10	1.13033e-10
1680	85	1.1782e-09	5.71316e-09	2.9178e-09	7.12242e-09	1.27673e-08	1.42669e-08	6.97455e-09	1.38835e-08	1.76774e-08	8.36029e-09	3.72478e-09	4.2715e-09	2.63099e-09	2.96976e-09	2.66157e-09	2.09177e-09	1.62555e-09	3.14373e-09	2.91532e-09	2.27024e-09	2.58598e-09	1.92759e-09	6.67076e-10	5.51488e-10	3.53152e-10	1.00493e-09	1.20534e-09	1.18205e-09	3.43533e-10	4.80408e-10	2.92018e-10	2.29128e-10	1.69666e-10	2.04176e-10	1.27907e-10	1.96806e-10	1.10922e-10
1700	86	1.24981e-09	5.98573e-09	3.20684e-09	8.04356e-09	1.36088e-08	1.51171e-08	7.18307e-09	1.45188e-08	1.6814e-08	7.97929e-09	3.53805e-09	3.89176e-09	2.55993e-09	2.95753e-09	2.59321e-09	2.12213e-09	1.62121e-09	3.00867e-09	3.00506e-09	2.30235e-09	2.63489e-09	1.91428e-09	6.99348e-10	4.9909e-10	3.59432e-10	1.0138e-09	1.2149e-09	1.21521e-09	3.49685e-10	4.68831e-10	2.81597e-10	2.17917e-10	1.71902e-10	1.93724e-10	1.25831e-10	1.86076e-10	1.06229e-10
1720	87	1.3549e-09	6.6232e-09	3.70082e-09	9.30878e-09	1.47898e-08	1.67694e-08	7.4868e-09	1.51745e-08	1.63039e-08	7.70091e-09	3.29643e-09	3.74327e-09	2.65516e-09	2.94112e-09	2.57914e-09	2.17441e-09	1.61821e-09	3.08854e-09	3.08829e-09	2.3859e-09	2.76578e-09	1.98814e-09	7.48389e-10	5.24385e-10	3.88893e-10	1.08462e-09	1.13161e-09	1.21854e-09	3.67771e-10	4.57755e-10	2.91321e-10	2.21549e-10	1.81312e-10	2.03739e-10	1.30235e-10	1.8998e-10	1.1522e-10
1740	88	1.45117e-09	7.08205e-09	4.05072e-09	9.93199e-09	1.55478e-08	1.75643e-08	7.46298e-09	1.44684e-08	1.47025e-08	7.23342e-09	2.97857e-09	3.54544e-09	2.55852e-09	2.9387e-09	2.49937e-09	2.1551e-09	1.61227e-09	3.04332e-09	2.99519e-09	2.23912e-09	2.72126e-09	1.98925e-09	7.44924e-10	5.07725e-10	3.89652e-10	1.11442e-09	1.04432e-09	1.19929e-09	3.77019e-10	4.49792e-10	3.07417e-10	2.29159e-10	1.84281e-10	2.10458e-10	1.37938e-10	1.94473e-10	1.20126e-10
1760	89	1.58626e-09	7.47826e-09	4.37614e-09	1.07028e-08	1.62309e-08	1.79354e-08	7.48751e-09	1.42203e-08	1.48608e-08	6.79357e-09	2.89511e-09	3.1872e-09	2.39796e-09	2.99322e-09	2.46246e-09	2.13079e-09	1.61923e-09	2.94582e-09	3.04234e-09	2.15022e-09	2.73746e-09	1.91681e-09	7.47231e-10	4.80024e-10	3.82895e-10	1.08386e-09	9.60139e-10	1.2233e-09	3.81833e-10	4.34754e-10	3.02964e-10	2.34457e-10	1.92767e-10	2.09236e-10	1.43576e-10	1.88069e-10	1.1909e-10
1780	90	1.65784e-09	7.5742e-09	4.41928e-09	1.15255e-08	1.69456e-08	1.79318e-08	6.89265e-09	1.43031e-08	1.35994e-08	6.17741e-09	2.41804e-09	2.64905e-09	2.32443e-09	3.22024e-09	2.39051e-09	2.03825e-09	1.58527e-09	2.88917e-09	2.99601e-09	1.93976e-09	2.58129e-09	1.84506e-09	7.33128e-10	4.55633e-10	3.50526e-10	1.06419e-09	7.8553e-10	1.18921e-09	3.85676e-10	4.24519e-10	2.74014e-10	2.30401e-10	1.86582e-10	2.09718e-10	1.53671e-10	1.83516e-10	1.19378e-10
1800	91	1.79922e-09	8.14722e-09	4.66695e-09	1.17218e-08	1.74027e-08	1.69506e-08	6.49536e-09	1.31977e-08	1.28357e-08	5.84681e-09	2.45838e-09	2.55256e-09	2.21101e-09	3.47502e-09	2.46888e-09	2.15101e-09	1.57545e-09	2.8988e-09	2.87485e-09	1.77779e-09	2.64376e-09	1.82941e-09	6.98244e-10	4.58186e-10	3.19473e-10	9.82596e-10	8.3091e-10	1.20441e-09	3.6529e-10	4.14569e-10	2.79628e-10	2.48115e-10	1.81975e-10	2.2201e-10	1.60438e-10	1.81615e-10	1.23375e-10
1820	92	1.88903e-09	8.63964e-09	4.61244e-09	1.2798e-08	1.90663e-08	1.60205e-08	5.96368e-09	1.38683e-08	1.16358e-08	5.33228e-09	2.04928e-09	2.37963e-09	2.20871e-09	3.40083e-09	2.4086e-09	1.988e-09	1.48426e-09	2.77664e-09	2.83123e-09	1.57122e-09	2.47963e-09	1.69705e-09	6.37832e-10	4.34257e-10	2.84461e-10	9.53046e-10	6.79544e-10	1.2086e-09	3.66644e-10	4.43032e-10	2.57713e-10	2.55807e-10	1.78852e-10	2.41072e-10	1.64863e-10	1.72622e-10	1.29469e-10
1840	93	1.7527e-09	8.36399e-09	4.55508e-09	1.39118e-08	1.89648e-08	1.42009e-08	4.79417e-09	1.44366e-08	1.13969e-08	4.51847e-09	1.75695e-09	1.88766e-09	1.9869e-09	3.06586e-09	2.13934e-09	1.84247e-09	1.36357e-09	2.38149e-09	2.69708e-09	1.45085e-09	2.37894e-09	1.49402e-09	5.89146e-10	4.00438e-10	2.38317e-10	8.50756e-10	5.57303e-10	1.20013e-09	3.29873e-10	3.77491e-10	1.97343e-10	2.30641e-10	1.73461e-10	2.16521e-10	1.52619e-10	1.45759e-10	1.28359e-10
1860	94	1.6077e-09	8.33924e-09	4.82506e-09	1.62507e-08	2.00277e-08	1.40173e-08	3.827e-09	1.57322e-08	1.14665e-08	3.89794e-09	1.522e-09	1.6143e-09	1.95152e-09	2.81002e-09	2.03341e-09	1.91941e-09	1.3817e-09	2.14215e-09	2.67656e-09	1.43401e-09	2.36464e-09	1.41723e-09	5.56544e-10	3.93897e-10	2.18484e-10	7.89863e-10	4.81541e-10	1.13351e-09	3.21261e-10	3.37346e-10	1.58853e-10	2.1736e-10	1.72937e-10	2.05553e-10	1.49659e-10	1.4366e-10	1.42429e-10
1880	95	1.482e-09	8.67202e-09	5.20547e-09	1.83275e-08	2.07207e-08	1.4525e-08	3.14942e-09	1.63928e-08	1.16171e-08	3.48344e-09	1.52514e-09	1.51584e-09	1.87178e-09	2.32304e-09	2.01557e-09	2.13449e-09	1.42522e-09	1.78464e-09	2.67482e-09	1.50981e-09	2.5049e-09	1.30514e-09	5.44381e-10	3.79406e-10	2.05875e-10	7.32867e-10	4.84335e-10	1.0601e-09	3.1613e-10	2.84917e-10	1.29103e-10	2.09079e-10	1.72998e-10	1.92758e-10	1.37564e-10	1.43798e-10	1.47689e-10
Phase Data (°)		Frequency (kHz)
Position on CA (µm)	Index Point	2	2.5	3	3.5	4	4.5	5	5.5	6	6.5	7	7.5	8	8.5	9	9.5	10	10.5	11	11.5	12	12.5	13	13.5	14	14.5	15	15.5	16	16.5	17	17.5	18	18.5	19	19.5	20
0	1	-3.3	1.33333	-6.63333	-1.16667	7.06667	-2.63333	-2.1	4.43333	1.76667	-6.76667	2	-1.33333	1.43333	-0.166667	-2.3	0.733333	-1.86667	-0.633333	-1.33333	2.43333	2.53333	-0.8	-1.8	2.03333	0.1	-2.06667	-1.26667	-1.23333	-3.46667	-2.46667	-1.53333	-3.36667	-0.1	0.266667	1.86667	-1.1	2.23333
20	2	-3.325	0.85	-7.375	-1.5	6.925	-3.975	-3.025	4.25	2.425	-8.75	1.725	-1.8	1.975	-0.325	-2.55	0.05	-3.15	-1.475	-1.75	1.95	1.95	-1.325	-3.1	1.425	-0.5	-3.275	-1.975	-1.6	-3.9	-3.65	-3.325	-4.225	-1.025	0.275	0.5	-1.975	-0.225
40	3	-2.44	0.44	-7.96	-1.52	6.14	-5.16	-3.94	5.18	3.28	-10.52	1.4	-1.96	1.64	-0.48	-4.02	-0.46	-4.36	-1.12	-2.78	1.8	1.08	-2.84	-4.54	1	-1.64	-4.54	-2.92	-2.54	-5.04	-4.58	-4.82	-5.18	-2.22	-1.38	-0.32	-3.98	-2.08
60	4	-4.86	-0.16	-8.5	-3.74	6.68	-10.08	-4.22	2.72	0.94	-11.64	0.4	-2.56	0.6	-1.76	-4.66	-1.76	-7.1	-2.84	-6.54	-0.4	-0.9	-4.52	-6.6	-1.3	-3.94	-7.28	-5.14	-4.22	-8.32	-8	-7.78	-7.74	-5.04	-5.24	-3.02	-9.42	-5.4
80	5	-5.52	-0.5	-9.98	-2.96	4.88	-9.7	-5	6.02	3.8	-14.02	-0.38	-2.54	-0.04	-2.02	-6.12	-2.7	-9.46	-4.06	-7.06	-1.54	-2.8	-7.94	-9.48	-2.72	-6.44	-9.14	-6.82	-6.56	-9.82	-11.3	-10.98	-10.1	-8.36	-7.12	-6.42	-10.72	-10.32
100	6	-5.56	-0.38	-10.98	-3.16	2.82	-9.88	-4.26	7.76	4.36	-16.34	-1.02	-3.2	-1.02	-2.94	-7.86	-4.42	-11.9	-5.68	-9.6	-3.44	-5.1	-10.18	-12.3	-4.56	-9.4	-11.66	-9.3	-8.7	-12.6	-14.24	-14.06	-13.16	-12.12	-10.7	-9.86	-14.44	-14.8
120	7	-3.82	-0.52	-12.4	-3.2	1.64	-8.76	-2.54	10.24	3.98	-18.04	-1.68	-3.84	-2.74	-4.16	-10.56	-5.8	-14.24	-7.48	-12.66	-5.62	-8.24	-13.06	-15.24	-6.48	-12.32	-15.42	-12.56	-11.92	-16.5	-17.88	-17.16	-16.5	-16.8	-15.88	-13.56	-17.8	-18.92
140	8	-4.12	0.54	-14.42	-4.16	-0.94	-6.52	-0.32	12.58	3.62	-19.78	-2	-5.02	-3.66	-5.92	-12.38	-8.02	-16.76	-10.9	-16.04	-8.16	-11.34	-15.9	-18.72	-8.9	-15.64	-18.56	-16.22	-15.54	-20.4	-22.24	-20.94	-21.44	-22.04	-19.86	-19.1	-21.18	-23.84
160	9	-3.46	1.52	-17.52	-3.88	-2.5	-1	-0.04	15.84	5.2	-22.8	-2.58	-6.74	-4.96	-7.2	-14.7	-10.62	-18.52	-13.3	-19.02	-10.66	-13.88	-18.76	-21.74	-11	-19.26	-22.2	-19.76	-19.44	-23.72	-25.8	-23.58	-26.28	-27.4	-22.82	-23.18	-23.74	-29.02
180	10	-2.18	1.78	-18.26	-6.46	-4.2	-2.64	1.08	13.72	1.08	-22.5	-2.78	-8.4	-6.4	-9.66	-17.74	-13.88	-21.5	-16.54	-24.72	-14.6	-17.1	-21.58	-25.42	-14.54	-23.58	-26.82	-24.78	-23.4	-29.96	-30.04	-27.5	-32.36	-33.84	-31	-29.3	-32.06	-33.42
200	11	1.08	1.76	-21.44	-7.92	-4.78	-1.34	-2.9	15.58	0.14	-26.24	-3.98	-10.1	-7.42	-11.34	-20.16	-15.44	-26.26	-19.74	-28.86	-18.38	-21.72	-25.22	-28.88	-18.58	-27.08	-31.76	-29.46	-27.2	-34.14	-33.8	-31.28	-37.72	-40.68	-34.66	-35.6	-38.1	-38.74
220	12	-0.38	2.64	-24.04	-10.02	-7.5	1.04	-4.04	16.32	0.2	-28.96	-4.72	-11.96	-8.86	-13.42	-22.28	-18.1	-29.92	-21.56	-32.8	-21.46	-24.9	-28.72	-31.7	-21.94	-31.44	-35.24	-33.2	-31.02	-38.14	-36.68	-34.14	-42.92	-47.26	-39.82	-41	-44.3	-43.72
240	13	-1.02	2.96	-25.28	-10.34	-8.06	1.42	-6.88	15.92	-1.42	-30.52	-5.8	-13.46	-10.84	-14.96	-24.06	-20.38	-33.5	-24	-36.4	-25.44	-28.38	-31.94	-34.04	-26.72	-35.6	-39.48	-36.9	-34.74	-42.9	-40.24	-37.28	-47.88	-53.82	-46.36	-46.28	-52	-49.06
260	14	-0.36	3.64	-25.04	-10.86	-10.68	1.12	-10.08	15.52	-3.34	-31.02	-7.2	-13.76	-12	-16.48	-25.86	-22.5	-38.1	-27.78	-38.6	-27.6	-29.82	-35.78	-37.78	-31.02	-40.08	-43.8	-41.58	-39.96	-49.64	-44.82	-44.74	-56.1	-62.4	-56.34	-56.26	-61.3	-58.18
280	15	0.22	4.04	-27.28	-10.42	-15.16	3.16	-16.4	14.12	-3.92	-36.18	-8.42	-16.08	-13.64	-17.92	-27.52	-24.04	-42.26	-29.9	-41.64	-31.14	-34.22	-38.46	-40.64	-35.86	-43.06	-48.36	-46.96	-44.3	-53.98	-48.78	-49.2	-61.72	-70.14	-61.96	-63.08	-66.82	-66.4
300	16	-3.12	5.2	-25.26	-11.44	-18.9	0.6	-16.72	12.8	-7.42	-33.76	-8.84	-15.96	-15.08	-19.12	-29.32	-26.82	-43.98	-32.12	-43.9	-33.18	-35.08	-42.22	-44.48	-40.42	-48.46	-52.4	-52.04	-49.72	-61.04	-54.62	-56.02	-69.6	-78.9	-74.32	-73.8	-78.9	-76.54
320	17	-3.92	4.26	-24	-11.2	-17.94	-2.44	-20.2	14.36	-9.4	-34.3	-10.52	-15.92	-16	-20.18	-30.18	-28.7	-46.86	-35.32	-46.18	-34.88	-36.68	-45.94	-49.6	-45.3	-52.72	-56.66	-57.1	-55.04	-67.54	-61.68	-65.24	-78.6	-88.1	-84.56	-86.44	-91.96	-89.02
340	18	-5.18	3.12	-23.46	-11.98	-21.52	-1.66	-22.12	14.02	-12.12	-35.46	-12.16	-16.02	-17.46	-21.24	-31.32	-30.44	-49	-37.52	-47.9	-36.62	-38.4	-49.64	-54.36	-49.46	-57.18	-61.8	-62.4	-61.22	-74.04	-68.48	-74.3	-87.62	-97.72	-95.26	-98.74	-103.06	-102.66
360	19	-8.28	0.82	-22.68	-11.58	-25.68	3.42	-19.66	15.94	-13.54	-36.12	-13.44	-15.56	-20.14	-22.08	-32.62	-31.88	-48.66	-38.78	-48.3	-38.3	-40.96	-53.2	-57.7	-54.14	-61.42	-65.5	-65.2	-67.76	-79.34	-76.44	-81.72	-96.68	-105.68	-106.74	-109.72	-114.42	-115.52
380	20	-10.28	0.2	-22.64	-13.18	-29.86	6.02	-14.34	17.76	-16.16	-37.8	-15.3	-16.46	-21.9	-24.04	-34.16	-33.1	-50.16	-40.86	-50.28	-40.76	-44.14	-56.94	-62.16	-58.34	-66.88	-71.66	-71.02	-75.68	-86.96	-85.9	-92.84	-107.3	-117.08	-117.88	-122.36	-127.16	-127.66
400	21	-11.54	-1.7	-22.78	-13.58	-33.96	9.56	-12.72	19.78	-18.66	-41.24	-16.74	-17.02	-23.12	-25.84	-35.72	-35.46	-52.64	-43.62	-53.2	-43.86	-47.52	-61.26	-67.54	-63.54	-72.24	-78.98	-77.74	-85.2	-95.32	-95.54	-106.36	-120.52	-128.7	-129.88	-135.88	-141.12	-140.82
420	22	-13.02	-1.56	-22.3	-14.24	-42.84	6.98	-11.32	18.66	-23.06	-43.08	-17.78	-16.46	-25.44	-27.52	-37.54	-37.52	-54.22	-46.18	-55.92	-47.34	-50.84	-65.4	-71.88	-69.9	-79.04	-87.26	-85.94	-96.34	-106	-106.74	-118.56	-133.88	-141.38	-142.96	-149.3	-154.64	-153.82
440	23	-13.68	-2.52	-23.54	-15.86	-47.92	4.98	-5.22	17.64	-25.86	-45.66	-19.64	-15.72	-27.5	-30.2	-39.28	-39.78	-56.98	-48.58	-59.34	-50.06	-53.3	-69.9	-77.94	-76.58	-86.62	-96.24	-95.28	-108.1	-118.06	-120.02	-132.44	-147.06	-155.62	-157.22	-164.38	-171.36	-166.74
460	24	-13.68	-0.54	-25.32	-18.46	-48.76	-9.24	-10.14	15.68	-29.22	-46.64	-21.16	-14.1	-28.52	-33	-41.92	-42	-62.12	-51.44	-64.22	-53.72	-57.8	-75.46	-86.24	-83.64	-95.24	-108.48	-108.82	-120.28	-132.82	-134.38	-149.16	-161.36	-171.96	-172.08	-180.02	-186.68	-179.4
480	25	-14.98	-1.7	-23.18	-18.68	-51.94	-13.02	-13.52	16.54	-31.32	-48.66	-22.56	-8.88	-29.94	-33.44	-43.34	-43.74	-62.6	-56	-65.8	-56.62	-60.44	-81.78	-93.72	-93.86	-105.94	-118.5	-119.8	-134.54	-144.54	-147.96	-163.88	-176.46	-186.16	-186.64	-196.1	-201.52	-193.28
500	26	-15.2	-0.92	-25.58	-19.82	-55.52	-16.96	-12.68	14.92	-36	-51.74	-24.8	-12.66	-33.38	-36.3	-45.3	-45.26	-65.24	-58.26	-69.2	-60.64	-65.98	-86.62	-101.02	-102.62	-115.46	-128.26	-130.52	-147.36	-156.44	-162.02	-176.04	-189.14	-200.56	-199.38	-207.64	-211.54	-202.14
520	27	-14.84	-1.02	-26.96	-21.8	-57.8	-16.86	-12.82	12.36	-42.16	-52.3	-26.86	-12.64	-34.84	-39.14	-48.18	-47.16	-70.28	-61.44	-72.78	-65.14	-71.82	-94.74	-111.18	-112.74	-126.12	-140.24	-141.26	-161.3	-170.1	-176.3	-190.7	-203.08	-215.2	-213.12	-220.32	-221.8	-207.36
540	28	-15.82	-0.28	-27.02	-21.54	-60.48	-21.44	-17.48	11.16	-46.3	-55.4	-28.54	-12.68	-35.22	-40.34	-50.46	-48.94	-72.88	-65.18	-76.32	-69.18	-78.04	-103.22	-121.96	-123.42	-136.86	-153.48	-151.74	-173.12	-182.9	-188.9	-203.18	-216.12	-227.12	-221.62	-229.64	-227.1	-211.14
560	29	-14.88	-0.38	-28.48	-22.38	-65.56	-18.7	-14.76	9.1	-49.46	-59.54	-30.6	-15.42	-36.82	-42.2	-53.64	-51.22	-77.1	-69.22	-80.64	-76.3	-86.58	-112.36	-132.04	-135.24	-148.32	-165.8	-164.4	-184.72	-194.02	-198.2	-212.84	-226.06	-235.56	-226.36	-232.9	-227.92	-209.88
580	30	-15.02	1.44	-32.18	-23.56	-64.02	-28.6	-21.7	3.9	-54.22	-59.3	-34.18	-21.34	-40.5	-46.7	-56.68	-56.22	-85.1	-72.68	-88.04	-82	-92.86	-122.8	-144.88	-145.08	-159.08	-178.82	-174.28	-195.52	-208.46	-208.18	-222.88	-234.74	-246.68	-231.36	-233.2	-228.86	-208.18
600	31	-16.4	-0.34	-29.28	-23.56	-65.94	-28.08	-21.6	1.86	-57.94	-60.96	-36.42	-17.44	-41.98	-47.6	-59.04	-58.56	-87.42	-77.68	-90.68	-88.84	-100.08	-133.98	-156.18	-158.64	-170.84	-190.42	-182.54	-207.48	-219.96	-215.78	-225.6	-237.2	-250.56	-227.38	-232.82	-226.1	-208
620	32	-16.62	-0.78	-28.46	-23.4	-66.54	-28.96	-21.52	0.7	-62.72	-65.4	-38.12	-23.5	-43.86	-49.76	-61.28	-61.84	-89.68	-81.68	-96.04	-98.26	-111.68	-145.08	-167.24	-170.76	-182.14	-202.3	-192.08	-217.12	-227.12	-222.64	-224.78	-236.94	-252.94	-219.4	-228.32	-224.56	-205.92
640	33	-15.2	-1.34	-26.8	-24.88	-65.74	-29.2	-22.92	2.68	-70.16	-66	-40.1	-26.06	-46.8	-52.8	-65.54	-65.74	-94.14	-86.34	-101.54	-108.12	-122.48	-154.64	-177.76	-183.4	-194.46	-213.74	-201.46	-228.94	-233.1	-228.28	-225.44	-235.54	-256.66	-216.32	-225.46	-226.32	-203
660	34	-15.12	-1.7	-26.44	-23	-64.26	-29.46	-21.02	-2.54	-79.66	-69.36	-40.54	-26.42	-46.94	-55.04	-68.42	-69.74	-96.98	-90.86	-109.86	-114.2	-131.98	-163.64	-193.64	-193.1	-205.82	-224.4	-205.98	-238.14	-236.58	-231.9	-224.18	-232.54	-257.12	-211.82	-225.6	-228.9	-200.4
680	35	-14.62	-2.86	-25.34	-24.32	-69.14	-20.82	-12.7	-5.48	-83.28	-73.5	-40.78	-27.6	-47.22	-57.42	-73.1	-72.7	-99.34	-94.6	-117.14	-125.04	-145.94	-171.34	-203.88	-203.08	-215.66	-234.6	-214.84	-243.44	-235.28	-233.02	-223.34	-229.98	-253.46	-209.98	-226.26	-231.26	-198.66
700	36	-12.78	-1.84	-29.16	-25.04	-69.84	-20.24	-14.32	-7.12	-87.76	-75.68	-40.54	-35.96	-51.66	-63.24	-77.2	-78.04	-107.26	-102.86	-130.08	-133.72	-158.28	-180.56	-219.64	-210.86	-224.68	-246.8	-221.06	-244.26	-233.88	-233.32	-226.26	-231.4	-251.36	-212.84	-225.22	-234.08	-193.12
720	37	-12.48	-1.5	-29.66	-24.18	-69.44	-17.12	-16.8	-1.16	-87.14	-74.68	-42.98	-35.5	-57.4	-68.42	-80.96	-83.42	-113.52	-114.68	-142.16	-140.6	-168.3	-188.94	-234.54	-220.64	-232.18	-254.14	-218.74	-242.5	-230.6	-230.28	-226.06	-230.6	-247	-213.48	-222.66	-232.1	-189.9
740	38	-12.04	-0.82	-31.04	-24.32	-70.1	-13.74	-17	-5.48	-87.8	-77.02	-43.86	-40.04	-61.18	-74.46	-85.36	-88.86	-121.96	-124.98	-155.34	-150.6	-179.64	-201.38	-247.48	-228.42	-236.92	-257.96	-217.88	-239.02	-228.58	-228.44	-226.64	-231.72	-241.72	-212.42	-220.06	-228.94	-186.72
760	39	-11.12	-1.32	-29.94	-25.88	-73.22	-11.78	-25.52	-5.32	-86.84	-81.52	-47.02	-43.72	-66.14	-81.06	-91.12	-95.8	-130.6	-135.32	-165.12	-161.78	-188.74	-215.26	-256.38	-237.22	-238.88	-259.62	-216.88	-235.42	-227.32	-228.22	-227.44	-232.58	-240.44	-212.54	-216.24	-225.46	-184.44
780	40	-10.84	-0.86	-30.1	-24.66	-66.44	-17.26	-27.38	-9.04	-96.08	-82.98	-47.84	-42.12	-67.88	-87.02	-95.94	-102.64	-141.04	-151.1	-175.46	-168.18	-193.46	-228.2	-268.68	-244.72	-237.62	-259.96	-213.2	-235.46	-230.44	-226.78	-226.94	-230.92	-237.04	-210.7	-214.8	-224.64	-182.48
800	41	-12.24	-0.44	-26.56	-26.94	-67.24	-20.22	-32.74	-8.06	-98.34	-85.88	-54.24	-40.12	-67.78	-93.66	-105.12	-112.08	-150.32	-163.08	-184.02	-180.78	-202.68	-239.72	-270.88	-249.64	-237.8	-258.52	-215.96	-236.6	-232	-227.66	-225.08	-230.74	-233.86	-210.78	-214.82	-221.54	-183.94
820	42	-12.14	1.02	-26.46	-29.26	-66.22	-27.12	-39.12	-14.82	-103.48	-89.12	-61.28	-42.78	-71.16	-101.38	-115.08	-121.98	-161.8	-173.88	-193.9	-191.5	-207.78	-249.62	-274.52	-251.24	-235.22	-257.54	-221	-241.06	-234.48	-229.46	-225.02	-231.86	-231.08	-212.82	-216.2	-220.42	-185.52
840	43	-12.16	0.22	-25.02	-31.64	-68.08	-24.9	-39.58	-17.78	-109.24	-91.08	-64.74	-47.24	-79.88	-110	-125.38	-133.58	-172.16	-187.64	-202.18	-199	-211.24	-255.16	-279.18	-250.64	-234.96	-256.48	-224.14	-245.22	-232.82	-230.64	-224.34	-231.54	-230.94	-213.54	-218.74	-218.04	-186.82
860	44	-12.76	0.88	-25.16	-32.9	-66.56	-25.42	-36.88	-17.26	-114.46	-86.36	-68.04	-50.9	-85.46	-118.94	-135.02	-142.9	-183.52	-201.98	-212.5	-209.28	-217.52	-261	-280.08	-249.06	-234.4	-255.88	-224.92	-245.92	-231.28	-229.06	-221.28	-230.02	-226.68	-214.72	-220.16	-217.34	-188.26
880	45	-14.88	2.76	-24.32	-32.9	-70.88	-18.7	-39.88	-17.06	-114.02	-85.98	-71.9	-59.84	-95.04	-128.14	-147.12	-154.7	-193.56	-214.24	-225.62	-222.96	-226.46	-270.92	-277.48	-245.18	-232.56	-253.28	-219.18	-241.72	-224.04	-229.18	-213.18	-228.76	-221.96	-216.94	-215.96	-209.98	-187.4
900	46	-11.8	7.6	-26.24	-31.36	-66	-27.46	-47.8	-17.7	-119.56	-84.18	-75.2	-63.38	-103.56	-138.48	-156.84	-162.46	-205.26	-224.48	-236.9	-227.62	-226.18	-275.34	-281.72	-246.54	-234.48	-255.14	-217.26	-239.8	-220.96	-229.38	-211.6	-229.46	-224.08	-216.2	-216.12	-211.14	-188.42
920	47	-12.36	8.16	-30.2	-31.52	-71.78	-25.22	-42.42	-19.14	-121.94	-84.48	-72.78	-67.8	-108.88	-148.12	-166.78	-172.22	-216	-234.38	-246.3	-235.98	-225.18	-277.88	-283.78	-246.96	-236.36	-254.92	-214.44	-235.9	-217.16	-229.08	-209.32	-227.86	-224.04	-216.5	-216.36	-213.36	-188.6
940	48	-15.16	9.76	-31.92	-32.58	-74.62	-29.9	-48.08	-11.7	-122.46	-82.38	-80.16	-71.22	-110.2	-157.8	-177.12	-183.38	-228.24	-245.5	-257.56	-248.3	-230.34	-280.7	-279.8	-251.84	-234.68	-254.34	-214.3	-230.16	-216.84	-227.62	-206.66	-227.24	-222.98	-216.98	-216.06	-216.9	-190.04
960	49	-15.44	10.3	-34.22	-33.06	-78.94	-32.06	-49.12	-11.04	-124.68	-81.82	-81.98	-75.86	-117	-166.7	-187.16	-193.16	-236.56	-253.36	-266.08	-253.36	-229.06	-278.38	-279.88	-253.78	-233.94	-252.82	-212.7	-227.86	-213.86	-229.32	-204.46	-228.32	-221.72	-218.18	-215.02	-220.06	-191.94
980	50	-12.58	10.68	-36.76	-35.56	-86.08	-36.28	-51.94	-11.84	-124.42	-84.56	-83.96	-82.26	-126.88	-175.72	-195.52	-200.84	-243.42	-257.42	-270.6	-255.26	-225.54	-271.68	-286.1	-259.38	-236.62	-254.02	-217.22	-228.32	-214.62	-231.8	-208.9	-231.86	-225.24	-217.88	-219.06	-227.38	-192.46
1000	51	-14.26	6.56	-38.88	-37.48	-92.5	-34.06	-49.2	-10.2	-123.18	-82.26	-87.74	-88.8	-134.04	-184.42	-205.32	-210.88	-250.04	-263.38	-275.48	-259.1	-226.4	-270.88	-287.66	-258.46	-232.86	-249.1	-212.94	-226.58	-213.04	-232.5	-207.64	-231.06	-223.66	-218.76	-217.32	-229.46	-191.66
1020	52	-12.42	5.8	-39.2	-35.46	-93.2	-37.04	-51.84	-11.5	-129.5	-87.38	-87.5	-90.84	-140.66	-191.52	-213.08	-215.84	-252.14	-265.28	-275.08	-258.18	-229.86	-268.72	-284.26	-257.62	-231.38	-242.94	-211.9	-224.84	-209.56	-231.32	-206.18	-229.72	-223.6	-216.48	-213.86	-230.54	-192.66
1040	53	-11.58	3.24	-39.42	-35.3	-94.2	-39.14	-51.1	-18.96	-133.74	-84.72	-85.14	-96.68	-150.06	-200.24	-222.24	-221.46	-257.5	-269.84	-276.2	-254.84	-229.46	-266.96	-288.2	-255.24	-230.28	-239.84	-209.54	-223.72	-209.06	-232.34	-206.66	-229.6	-221.8	-217.84	-213.1	-232.32	-192.9
1060	54	-11.36	5.16	-39.82	-38.58	-95.6	-40.7	-51.44	-15.02	-134.74	-84.66	-89.46	-116.28	-165	-209.14	-232.24	-232.32	-261.42	-271.44	-275.16	-258.44	-236.42	-268.68	-284.7	-255.38	-227.18	-240.22	-212	-223.24	-208.22	-231.7	-206.36	-228.72	-222.54	-216.02	-210.96	-230.42	-190.24
1080	55	-12.78	3.72	-39.2	-40.36	-92.84	-46.72	-53.98	-8.1	-136.42	-79.98	-97.02	-120.22	-169.16	-221.06	-243.72	-242.08	-267.5	-276.52	-274.56	-258.34	-237.94	-272.7	-284.46	-253.66	-225.4	-239.62	-209.14	-222.58	-207.34	-232.68	-204.82	-227.02	-221.02	-215.94	-211.1	-231.9	-190.8
1100	56	-11.02	3.08	-37.9	-41.36	-95.56	-44.54	-51.8	-9	-140.8	-86.12	-101.24	-128.74	-176.74	-231	-253.88	-250.9	-269.38	-278.56	-274.28	-258.82	-240.28	-274.52	-283.56	-253.56	-223.12	-239.42	-209.76	-222.38	-205.48	-230.22	-205.22	-225.38	-220.2	-216.04	-212	-234.52	-190.5
1120	57	-11.34	-1.32	-37.8	-46.04	-95.8	-41.8	-53.24	-12.04	-144.74	-84.44	-105.78	-142.16	-184.78	-244.14	-267	-261.4	-276.7	-286.7	-276.94	-262	-239.88	-277.7	-287.08	-253.98	-221.86	-241.7	-212.4	-221.84	-207.98	-229.72	-211.14	-227.2	-221.56	-217.48	-218.1	-239.2	-191.44
1140	58	-9.36	2.34	-41.22	-45.98	-96.82	-48.28	-52.82	-9.22	-148.12	-90.16	-111.86	-159.06	-198.06	-252.16	-276.54	-267.92	-276.38	-284.18	-275.52	-263.08	-241.9	-279.46	-288.32	-255.24	-223.64	-244.5	-211.92	-221.98	-204.96	-229.06	-208.24	-225.36	-224.42	-218.28	-216.94	-239.5	-190.72
1160	59	-8.62	0.82	-42.1	-42.42	-99.6	-53.2	-64.14	-15.04	-147.82	-99.94	-121.02	-153.24	-199.52	-262.68	-285.9	-272.5	-275.68	-283.5	-274.32	-258.78	-235.12	-278.52	-292.2	-254.46	-223.52	-241.64	-205.12	-224.34	-201.12	-227.32	-205.92	-222.38	-223.12	-219.24	-217.34	-240.5	-191.8
1180	60	-10.36	4.08	-44.7	-45.02	-100.4	-52.58	-63.08	-18.76	-150.66	-102.86	-124.76	-165.18	-208.28	-271.38	-292.8	-282.42	-277.36	-281.32	-276.52	-263.92	-238.5	-277.7	-284.74	-255.42	-223.02	-243.52	-208.38	-223.06	-200.5	-226.3	-208.34	-221.78	-224.5	-221.48	-217.58	-240.34	-194.92
1200	61	-12.68	6.3	-47.38	-45.98	-98.98	-54.62	-67.16	-28.44	-157.08	-103.24	-126.12	-171.26	-215.2	-278.38	-298.64	-287.98	-282.08	-282.48	-279.04	-266.24	-237.66	-279.44	-283.08	-256.22	-224.34	-245.66	-207.36	-221.24	-201.04	-228.34	-211.3	-222.36	-225.32	-224.36	-219.32	-241.88	-198.48
1220	62	-14.78	9.84	-51.26	-47.04	-103.7	-57.12	-66.9	-25.8	-155.56	-103.34	-135.98	-183.56	-229.56	-282.98	-303.22	-293.26	-281.02	-280.2	-280.92	-266.16	-238.3	-278.74	-282.94	-257.58	-223.56	-246.94	-204.66	-220.2	-201.54	-231.7	-209.96	-221.1	-224.5	-227.8	-218.26	-241.04	-199.46
1240	63	-15.78	7.14	-49.24	-49.92	-103.6	-56.74	-75.32	-19.76	-155.28	-102.22	-150	-189	-230.38	-289.32	-308.08	-297.26	-281.54	-285.82	-281.6	-266.76	-234.04	-276.78	-283.28	-258.26	-219.88	-245.84	-203.04	-223.72	-203.86	-230.62	-212.4	-223.78	-223.66	-228.18	-220.7	-244.7	-200.82
1260	64	-17.08	8.38	-49.78	-50.26	-104.24	-55.96	-70.54	-21.62	-162.26	-104.9	-152.12	-198.98	-239.6	-293.38	-311.74	-301.44	-285.64	-291.84	-284.14	-269.28	-238.46	-278.78	-281.34	-261.92	-222.3	-247.68	-205.7	-219.96	-205.76	-233.62	-214.12	-224.78	-225.28	-229.18	-220.7	-248.44	-204.44
1280	65	-17.96	10.64	-49.68	-51.08	-104.6	-58.02	-76.78	-27.74	-170.56	-113.44	-156.66	-206.86	-244.92	-296.16	-314.76	-306.94	-287	-295.3	-282.16	-270.76	-237.7	-277.48	-277.54	-265.1	-223.66	-247.3	-205.94	-220.42	-206.02	-236.04	-214.8	-227.46	-225.8	-228.04	-219.94	-250.52	-205.54
1300	66	-20.16	9.94	-49.84	-52.98	-107.52	-58.86	-77.06	-27.34	-171.16	-115.72	-168.24	-216.72	-252.86	-299.92	-317.88	-307.28	-287.34	-302.38	-279.54	-270.72	-239.12	-273.46	-278.54	-268.2	-224.46	-245.52	-209.02	-221.92	-208.12	-237.56	-214.06	-229.5	-225.84	-230.12	-220.28	-252.94	-205.2
1320	67	-19.1	10.22	-51.44	-53.96	-108.58	-65.84	-89.2	-31.6	-170.74	-119.06	-178.06	-223.32	-257.48	-303.22	-319.8	-304.32	-284.92	-303.12	-275.24	-267.36	-239.06	-269.72	-276.58	-266.54	-223.4	-248.74	-211.94	-227	-209.28	-236.18	-214.04	-232.34	-228.88	-231.58	-223.06	-254.9	-202.88
1340	68	-19.12	13.56	-52.76	-53.52	-111.36	-64.56	-91.7	-41.48	-181.4	-133.12	-177.44	-228.74	-261	-305.68	-319.34	-304.54	-287.74	-306.62	-274.56	-268.5	-240.18	-268.78	-272.58	-265.16	-225.02	-250.56	-214.12	-223.82	-206.64	-241.06	-215.24	-232.44	-230.78	-233.7	-221.88	-256.14	-202.24
1360	69	-19.3	9.96	-51.94	-58.46	-114.08	-62.42	-93.76	-42.02	-185.74	-135.04	-181.6	-239.8	-264.76	-308.18	-322.02	-304.9	-291.4	-317.72	-275.2	-271.72	-240.1	-266.72	-277.2	-263.3	-227.36	-253.44	-217.32	-226.22	-211.72	-243.72	-221.6	-236	-234.76	-236.96	-228.98	-259.18	-201.18
1380	70	-20.58	11.5	-52.74	-61.28	-113.22	-71.42	-93.54	-41.02	-190.14	-133.32	-188.2	-247.06	-271.04	-310.32	-325.14	-301.82	-293.4	-322.2	-274.8	-271.04	-241.96	-265.3	-278.14	-260.72	-230.36	-253.26	-220.98	-226.5	-218.08	-241.72	-221.66	-234.42	-235.42	-241.22	-230.86	-259	-202.04
1400	71	-17.56	9.54	-56.74	-58.58	-115.1	-73.12	-96.98	-39.7	-189.76	-139.7	-189.24	-251.52	-270.88	-309.2	-323	-300.5	-288.46	-319.32	-270.7	-268.78	-240.16	-264.2	-276.46	-256.62	-228.12	-255.08	-218.88	-230.58	-216.14	-239.84	-219.48	-232.12	-234.96	-238.16	-228.56	-256	-203.28
1420	72	-18.88	11.22	-52.94	-57.96	-115.14	-72.48	-102.92	-47.86	-203.28	-154.94	-189.72	-255.04	-266.02	-308.72	-322.72	-303.96	-291.78	-329.34	-272.62	-273.66	-238.34	-265.6	-276.7	-257.94	-231.4	-255.44	-218.88	-228.1	-216.88	-239.94	-220.24	-232	-232.72	-236.68	-226.42	-254.88	-205.12
1440	73	-21.2	10.56	-54.34	-59.44	-117.88	-72.36	-102.46	-51.72	-203.16	-156.96	-194.78	-263.54	-267.92	-310.52	-327.26	-307.22	-291.1	-335.82	-276.78	-276.94	-236.58	-269.46	-278.88	-259.78	-233.62	-259.56	-219.34	-232.18	-221.38	-235.24	-221.84	-232.78	-232.26	-236.62	-228.42	-255.62	-204.54
1460	74	-20.52	10.74	-55.12	-57.76	-118.62	-75.18	-103.2	-51.34	-208.4	-154.66	-201.8	-268.5	-271.12	-312.32	-324.48	-303.68	-290.04	-336.88	-278.28	-275.42	-234.62	-268.3	-280.08	-261.62	-233.66	-258.16	-220.16	-231.9	-224.98	-229.76	-219.34	-233.32	-231.24	-235.06	-225.52	-254.5	-204.68
1480	75	-18.86	0.58	-51.34	-57.06	-125.7	-68.08	-110.36	-50.16	-216.04	-166.22	-205.28	-271.52	-264.82	-310.54	-313.44	-296.48	-287.72	-341.96	-279.54	-275.04	-232.22	-265.1	-280.16	-263.72	-234.06	-257.74	-221.36	-230.6	-226.46	-227.12	-221.74	-235.12	-231.92	-227.52	-225.88	-253.38	-204.66
1500	76	-20.16	1.82	-46.24	-57.38	-125.26	-76.56	-116.44	-44.08	-221.72	-165.5	-213.5	-273.62	-263.36	-310.48	-308.42	-293.92	-290.72	-343.5	-281.14	-276.8	-233.7	-266.86	-282.8	-265.38	-238.78	-257.7	-226.98	-228.48	-232.36	-229.9	-225.24	-240.28	-237.66	-226.68	-230.12	-256.42	-209.84
1520	77	-19.86	-6.34	-49.1	-59.04	-130.9	-72.1	-106.54	-41.5	-218.86	-158.3	-216.82	-273.38	-261.34	-313.04	-303.5	-294.98	-291.98	-346.66	-282.62	-278.38	-236.54	-270.72	-283.84	-268.2	-241.44	-257.26	-230.7	-227.52	-236.04	-229.92	-226.72	-240.24	-242.62	-230.2	-232.68	-259.12	-211.12
1540	78	-17.66	-9.8	-48.68	-55.94	-133.28	-73.8	-109.96	-43.1	-223.4	-161.72	-222.82	-263.86	-260.28	-312.9	-295.98	-293.74	-290.76	-348.6	-280.64	-277.8	-240.04	-267.94	-282.08	-269.86	-243.4	-251	-232.22	-223.2	-238.64	-231.9	-226.14	-240.78	-240.56	-231.54	-233.42	-255.66	-212.98
1560	79	-16.26	-6.4	-48.8	-62.32	-137.36	-78.56	-118.7	-42.36	-233.36	-174.8	-225.3	-276.3	-255.66	-308.98	-294.54	-295.98	-286.06	-339.52	-277.36	-280.06	-239.7	-269.36	-271.72	-269.54	-243.6	-250.38	-233.86	-221.08	-236.18	-237	-231.06	-240.6	-242.12	-230.8	-236.18	-251.2	-219.5
1580	80	-12.8	-10.44	-51.92	-59.24	-142.82	-80	-124.1	-45.9	-232.42	-178.2	-232.36	-275.86	-256.88	-308.44	-298.4	-298.16	-286.38	-344.46	-277.18	-279.38	-239.84	-271.72	-278.2	-270.6	-246.06	-250.88	-235.42	-225	-234.78	-243.36	-233.84	-243.46	-248.22	-236.16	-241.42	-255.2	-221.18
1600	81	-12.84	-12.1	-55.02	-62.64	-147.42	-79.06	-129.6	-49.6	-237.48	-182.08	-234.88	-280.06	-258.18	-308.74	-303.38	-300.52	-282.2	-341.66	-277.16	-279.64	-240.54	-269.38	-278.88	-271.92	-246.4	-252.24	-236.08	-228.84	-234.76	-245.72	-236	-245.68	-250.16	-239.36	-246.9	-256.6	-220.72
1620	82	-11.68	-7.42	-52.92	-60.1	-146.5	-88.3	-141.98	-55.4	-253.42	-195.38	-239.5	-274.72	-260.76	-307.04	-311.36	-299.88	-281.56	-343.62	-274.62	-281.06	-242.08	-266.02	-276.22	-275.82	-249.36	-250.12	-238.46	-227.82	-235.16	-249.02	-236.56	-247.28	-247.26	-237.1	-246.4	-253.92	-223.84
1640	83	-9.54	-6.32	-54.04	-70.44	-153.92	-90.56	-143.6	-53.44	-260.3	-200.1	-245.56	-291.28	-268.84	-305.92	-324.34	-300.82	-279.02	-343.22	-274.78	-281.7	-240.52	-267.66	-277.86	-277.34	-251.06	-256.68	-245.24	-232.28	-238.68	-253.14	-240.02	-251.76	-256.52	-245.6	-250.22	-261.66	-228.44
1660	84	-10.54	-10.3	-56.9	-70.18	-158.56	-92.98	-147.76	-62.62	-259.04	-209.68	-250.6	-277.3	-267.92	-307.3	-330.08	-303.02	-275.5	-343.06	-273.58	-283.02	-244.22	-266.74	-273.32	-279.68	-251.94	-260.94	-249.26	-237.34	-240.46	-253.18	-237.42	-252.4	-261.04	-250.72	-251.06	-268.82	-228.68
1680	85	-13.38	-16.26	-60.06	-77.22	-161.24	-99.18	-148.48	-62.26	-262.26	-201.48	-249.9	-272.66	-266.12	-308.38	-332.1	-306.1	-270.62	-335.04	-270.78	-279.94	-243.66	-267.16	-276.22	-277.68	-248.6	-265	-248.44	-242.76	-241.08	-253.7	-233.32	-251	-263.22	-253.84	-257.02	-282.74	-231.14
1700	86	-7.72	-18.28	-60.82	-80.86	-170.32	-97.5	-151.9	-82.5	-280.16	-222.1	-251.98	-275.88	-275.46	-309.98	-345	-312.86	-268.82	-348.04	-270	-283.88	-244.44	-269	-273.02	-281.32	-248.3	-265.9	-250.5	-241.26	-243.54	-249.7	-236.16	-242.9	-258.2	-259.76	-256.12	-289.42	-231.68
1720	87	-5.48	-20.18	-63.22	-88.66	-181.02	-100.8	-157.56	-84.18	-276.3	-225.24	-254.2	-289.72	-274.3	-309.62	-344.28	-311.02	-264.88	-344.94	-273.22	-286.42	-243.58	-269.26	-271.88	-278.42	-246.1	-269.8	-255.86	-246.88	-245.88	-250.08	-237.08	-244.88	-265.92	-268.78	-263.2	-300.12	-229.98
1740	88	-1.58	-18.46	-65.3	-87.52	-185.28	-114.96	-176.16	-104.08	-282.86	-257.88	-256.68	-266.36	-262.94	-308.32	-343.82	-310.62	-263.06	-343.6	-266.72	-290.66	-248.98	-267.78	-252.12	-282.84	-242.28	-270.08	-257.3	-244.26	-244.36	-249.48	-236.22	-242	-260.54	-258.66	-255.28	-290.76	-227.2
1760	89	7.84	-20.44	-66.52	-83.64	-196.1	-117.28	-184.92	-116.52	-292.02	-273.6	-253	-268.34	-262.44	-308	-348.58	-307.96	-267.98	-359.58	-268.24	-293.56	-245.54	-266.56	-256.52	-284.74	-241.28	-268.26	-259.76	-242.38	-243.18	-246.42	-234.94	-238.52	-258.4	-252.92	-250.7	-288.8	-223.94
1780	90	5.44	-21.42	-65.96	-85.76	-195.16	-136.2	-208.16	-144.98	-298.72	-299.14	-261.12	-206.78	-233.56	-311.4	-332.66	-309.42	-272.48	-358.58	-262.58	-297.88	-254.04	-275.08	-240.1	-296.26	-238.34	-275.22	-259.18	-233.98	-244.48	-255	-231.9	-248.78	-249.54	-244.88	-241.92	-305.24	-229.14
1800	91	15.16	-30.7	-67.82	-89.98	-208.84	-132.54	-206.12	-159.72	-295.22	-330.74	-253.8	-184.96	-202.66	-308.82	-324.18	-305.1	-276.32	-373.6	-274.68	-302.42	-245.26	-263.62	-205.64	-300.58	-227.82	-275.54	-261.02	-229.34	-239.72	-253.88	-228.3	-248.6	-258.36	-235.46	-227.42	-290.24	-220.14
1820	92	4.72	-41.7	-64.12	-86.1	-209.46	-136.68	-217.3	-150.74	-282.98	-347.66	-238.86	-153.54	-164.16	-301.18	-298.14	-304.04	-272.82	-359.26	-272.74	-297.88	-238.46	-252.92	-197.28	-296.34	-220.88	-271.08	-252.38	-229.4	-225.32	-245.86	-217.02	-247.56	-281.2	-212.88	-213.88	-274.2	-232.24
1840	93	-12.42	-54.72	-61.62	-81.92	-211.8	-135.24	-225.34	-130.78	-268.46	-337.46	-216.48	-140.48	-127.08	-292.86	-264.84	-298.92	-269.24	-343.06	-276.62	-291.36	-228.1	-242.32	-208.3	-285.88	-218.02	-264.92	-246.24	-233.86	-212.6	-236.9	-204.12	-245.94	-304.16	-197.68	-208.7	-270.54	-249.84
1860	94	-23.65	-64.65	-60.225	-86.65	-208.6	-140.575	-232.125	-126.5	-258.775	-341.525	-212.15	-105.65	-93.325	-289.65	-240.1	-298.75	-266.425	-329.975	-277.025	-287.15	-226.1	-238.075	-197.6	-285.175	-212.025	-266.15	-241.85	-234.25	-207.4	-238	-198.725	-251.55	-316.225	-189.625	-205.075	-273.225	-256.575
1880	95	-20.3667	-64.3	-59.1	-80.9	-222.267	-118.833	-218.3	-100.567	-249.8	-359.6	-189.833	-160.733	-90.1	-277.4	-243.633	-290.867	-258.267	-332.7	-289.9	-286.5	-206.767	-214.133	-191.633	-271.5	-208.167	-252.267	-241.333	-239.533	-194.8	-217.067	-194.633	-235.667	-343.633	-181.433	-193.4	-227.067	-255.6
